# Supplementary material for: Facile Oxidative Rearrangements Using Hypervalent Iodine Reagents
Source: PubMed Central journal article supplement (PMC3922481; doi:10.1002/open.201200037), 2012-11-06

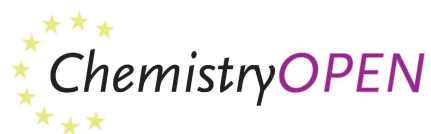

## Supporting Information

© 2012 The Authors. Published by Wiley-VCH Verlag GmbH & Co. KGaA, Weinheim

### **Facile Oxidative Rearrangements Using Hypervalent Iodine Reagents**

Fateh V. Singh, Julia Rehbein, and Thomas Wirth<sup>\*[a]</sup>

open\_201200037\_sm\_miscellaneous\_information.pdf

**General:**

Melting points were obtained in open capillary tubes using Gallenkamp apparatus. NMR spectra were recorded on Bruker DPX 250, Bruker DPX 400, Bruker DPX 500, or Oxford 300.  $^1\text{H}$  NMR spectra were measured at 250, 300, 400 and 500 MHz.  $^{13}\text{C}$  NMR spectra were measured at 63, 100 and 126 MHz, using  $\text{CDCl}_3$ ,  $\text{CD}_3\text{CN}$  or  $\text{DMSO-d}_6$  as a solvent and internal reference. Coupling constants  $J$  are given in Hz. Multiplicity as follows: s = singlet, d = doublet, t = triplet, q = quartet, m = multiplet, b = broad signal. All starting materials were purchased from commercial suppliers and used without further purification. Mass spectra ( $m/z$ ) and HRMS were recorded under the conditions of electron impact (EI) and electrospray (ES) and chemical ionization (CI). Infrared spectra were recorded on a JASCO FT/IR-660 Plus spectrometer. GC-MS measurements were done on a Perkin Elmer Turbomass. Melting points were taken from Gallenkamp heater and are uncorrected. Flash chromatography was carried out using Fisher silica gel (35-70 mesh) or using a Biotage Isolera system. Dry solvents such as THF, acetonitrile and diethyl ether were used from a solvent purification system while anhydrous DMSO was purchased from Sigma Aldrich. All other purchased chemicals were used without further purification. The hypervalent iodine reagents (diacetoxyiodo)benzene,<sup>[1]</sup> (bis[trifluoroacetoxy]iodo)benzene,<sup>[2]</sup> Koser reagent,<sup>[1]</sup> 2-iodoxybenzoic acid (IBX),<sup>[3]</sup> iodosylbenzene<sup>[4]</sup> and  $\mu$ -oxo-bridged phenyliodine trifluoroacetate<sup>[5]</sup> were synthesized in the laboratory. Lactate-based chiral hypervalent iodine reagents have been synthesized according to a procedure by Fujita *et al.*,<sup>[6]</sup> Reactions requiring the exclusion of air were carried out under an atmosphere of argon or nitrogen in oven-dried glassware using usual Schlenk technique.

**Table S1.** Different hypervalent iodine reagents for the oxidative rearrangement of compound **1a**.

| Entry | Reagent                               | Reaction Time [h] | <b>2a</b> Yield [%] <sup>[a]</sup> |
|-------|---------------------------------------|-------------------|------------------------------------|
| 1     | PhI(OCOCF <sub>3</sub> ) <sub>2</sub> | 0.5               | 93                                 |
| 2     | PhI(OAc) <sub>2</sub>                 | 1                 | 85                                 |
| 3     | PhI(OH)OTs                            | 0.5               | 91                                 |
| 4     | PhIO                                  | 15                | 32                                 |
| 5     |                                       | 1                 | 84 <sup>[b]</sup>                  |
| 6     | IBX                                   | 15                | 21                                 |

[a] Reactions performed in MeCN at r.t. with 2 eq. TMSOTf. [b] Reaction performed at 0 °C; reaction at r.t. for 0.25 h: 73% yield; reaction at –78 °C for 24 h: 21% yield.

### Syntheses and Reactions:

#### General procedure for the synthesis of 4-arylbut-4-enoic acids (**1a**, **1e** and **1f**):<sup>[7]</sup>

The mixture of  $\alpha$ -substituted phenyl acetaldehydes (1 mmol), malonic acid (104 mg, 1.0 mmol) and pyridine (0.082 mL, 1.0 mmol) was stirred with heating at 95 °C for 12-72 h. The reaction was monitored by TLC. The reaction with  $\alpha$ -methyl phenyl acetaldehyde was quite slow and was complete after 72 h while the reaction with phenyl acetaldehyde and 1,1-diphenyl acetaldehyde were complete after 12 h. After completion of the reaction, the reaction mixture was cooled to room temperature and dissolved in Et<sub>2</sub>O (8 mL) followed by extraction with 2 M aq. NaOH solution (3 x 5 mL). The organic layer was discarded and the aqueous extract was acidified by dropwise addition of concentrated sulfuric acid up to pH 1-2. The acidified aqueous layer was extracted with Et<sub>2</sub>O (3 x 5 mL). The combined organic extracts were washed with saturated brine, dried (MgSO<sub>4</sub>), filtered and concentrated in vacuum. The crude product mixtures were purified by column chromatography by using methanol / dichloromethane (1:100) as eluent.

#### 4,4-Diphenylbut-3-enoic acid (**1a**):<sup>[8]</sup>

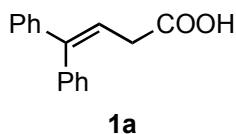

Light yellow solid; m.p.: 110–112 °C; yield: 77% (183 mg, 0.77 mmol); <sup>1</sup>H NMR (400 MHz, CDCl<sub>3</sub>): δ = 3.25 (d, *J* = 7.2 Hz, 2H, CH<sub>2</sub>), 6.27 (t, *J* = 7.4 Hz, 1H, CH), 7.21–7.23 (m, 2H, ArH), 7.28–7.30 (m, 5H, ArH), 7.37–7.45 (m, 3H, ArH) ppm; <sup>13</sup>C NMR (100 MHz, CDCl<sub>3</sub>): δ = 35.1, 119.5, 127.4 (2C), 127.6 (2C), 128.2 (2C), 128.5 (2C), 129.7 (2C), 139.1, 141.8, 145.4, 178.0 ppm.

#### Synthesis of **1b** and **1c**:

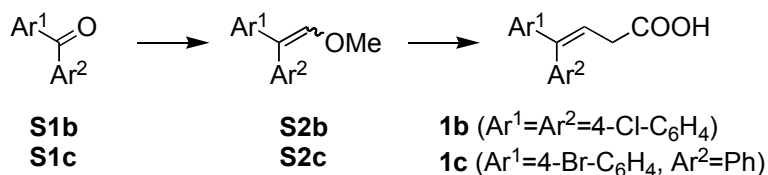

#### General procedure for the synthesis of 1-methoxy-2,2-diarylethenes (**S2b**, **S2c**):

(Methoxymethyl)triphenylphosphonium chloride (684 mg, 2.0 mmol) was suspended in THF (10 mL). The colorless suspension was cooled to 0 °C and *n*-BuLi (2.5 M in hexane, 0.8 mL, 2.0 mmol) was added dropwise and the resulting bright orange solution was stirred at 0 °C for 30 min. A solution of benzophenones **S1a** or **S2b** (2.2 mmol) in THF (5 mL) was added dropwise and the reaction mixture was stirred overnight at room temperature. The reaction was monitored by thin layer chromatography. After completion of the reaction, the solvent was removed under vacuum and reaction mixture was poured into ice-cold water (10 mL). After the acidification with 1 M HCl, the reaction mixture was extracted with dichloromethane (3 x 10 mL). The organic layer was dried over MgSO<sub>4</sub>, filtered and concentrated under reduced pressure. The crude product was purified by column chromatography on silica gel by using dichloromethane / hexane (1:9) as eluent.

**4,4'-(2-Methoxyethene-1,1-diyl)bis(chlorobenzene) (S2b):**

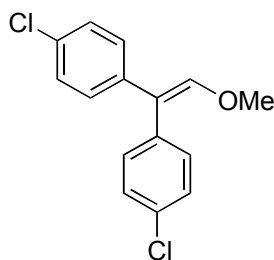

**S2b**

Colorless solid; m.p.: 128–130 °C; yield: 79% (441 mg, 1.58 mmol);  $^1\text{H}$  NMR (400 MHz,  $\text{CDCl}_3$ ):  $\delta$  = 3.83 (s, 3H, OMe), 6.50 (s, 1H, CH), 7.17 (td,  $J_1$  = 2.4 &  $J_2$  = 8.4 Hz, 2H, ArH), 7.30 (td,  $J_1$  = 2.0,  $J_2$  = 8.4 Hz, 2H, ArH), 7.35 (d,  $J$  = 2.4 Hz, 4H, ArH) ppm;  $^{13}\text{C}$  NMR (125 MHz,  $\text{CDCl}_3$ ):  $\delta$  = 61.3, 118.8, 128.7 (2C), 129.0 (2C), 129.9 (2C), 131.6 (2C), 132.8, 132.9, 136.1, 139.0, 147.4 ppm; IR (film):  $\nu$  = 2931, 2833, 1729, 1660, 1631, 1590, 1399, 1232, 1091, 1013, 830  $\text{cm}^{-1}$ ; HRMS (APCI):  $m/z$   $[\text{M}+1]^+$  calcd for  $\text{C}_{15}\text{H}_{13}\text{Cl}_2\text{O}$ : 279.0338; found 279.0341.

**(E/Z)-1-Bromo-4-(2-methoxy-1-phenylvinyl)benzene (S2c):**

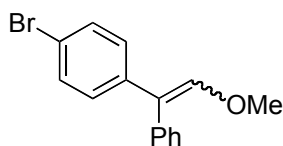

**S2c**

Colorless oil; yield: 74% (428 mg, 1.48 mmol); 1:1 mixture of isomers:  $^1\text{H}$  NMR (400 MHz,  $\text{CDCl}_3$ ):  $\delta$  = 3.84 (s, 3H, OMe), 3.85 (s, 3H, OMe), 6.54 (s, 1H, CH), 6.55 (s, 1H, CH), 7.18 (td,  $J_1$  = 2.0,  $J_2$  = 7.2 Hz, 2H, ArH), 7.28-7.31 (m, 2H, ArH), 7.33-7.50 (m, 12H, ArH), 7.53 (td,  $J_1$  = 2.0,  $J_2$  = 7.2 Hz, 2H, ArH) ppm;  $^{13}\text{C}$  NMR (125 MHz,  $\text{CDCl}_3$ ):  $\delta$  = 60.7, 119.5, 119.7, 120.3, 120.4, 126.8 (2C), 126.9, 128.2 (2C), 128.4 (2C), 128.5 (2C), 129.87 (2C), 129.91 (2C), 131.2 (2C), 131.5, 131.6 (2C), 136.7, 137.2, 139.6, 140.0, 146.6, 146.9 ppm; IR (film):  $\nu$  = 2922, 1725, 1654, 1586, 1487, 1447, 1072, 1010, 830, 754  $\text{cm}^{-1}$ ; HRMS (APCI):  $m/z$   $[\text{M}+1]^+$  calcd for  $\text{C}_{15}\text{H}_{14}\text{BrO}$ : 289.0223; found 289.0227.

### General procedure for the synthesis of 4,4-diarylbut-4-enoic acids (**1b**, **1c**):

To a solution of 1-methoxy-2,2-diarylethene **S2b** or **S2c** (0.5 mmol) in 1,4-dioxane (5 mL), NaI (570 mg, 3.8 mmol) and aq. H<sub>2</sub>SO<sub>4</sub> (2 M, 0.5 mL) were added. The mixture was stirred overnight at room temperature. The reaction was monitored by TLC. After the completion of reaction, 1,4-dioxane was removed under vacuum and water (5 mL) was added. A saturated aqueous solution of Na<sub>2</sub>S<sub>2</sub>O<sub>3</sub> was added dropwise until the violet color disappeared completely. The mixture was extracted with dichloromethane (3 x 5 mL). The combined organic layers were washed with aqueous NaHCO<sub>3</sub>, brine and dried over MgSO<sub>4</sub>, filtered and concentrated under reduced pressure. The crude product was used in the next step without any further purification. In the next step the crude product was mixed with malonic acid (52 mg, 0.5 mmol) and pyridine (0.041 mL, 0.5 mmol) and heated at 95 °C. The rapid formation of a yellow/orange homogeneous solution was accompanied by the evolution of gas and the mixture was heated overnight before the resultant orange solution was cooled to room temperature. The cooled mixture was dissolved in Et<sub>2</sub>O (5 mL) and extracted with 2 M aqueous NaOH solution (3 x 5 mL). The organic layer was discarded and the aqueous extract was acidified by dropwise addition of concentrated sulfuric acid up to pH 1-2. The acidified aqueous layer was extracted with Et<sub>2</sub>O (3 x 5 mL). The combined organic extracts were washed with saturated brine, dried (MgSO<sub>4</sub>), filtered and concentrated under vacuum. Finally the crude products were purified by column chromatography by using methanol / dichloromethane (1:100) as eluent.

### 4,4-Bis(4-chlorophenyl)but-3-enoic acid (**1b**):

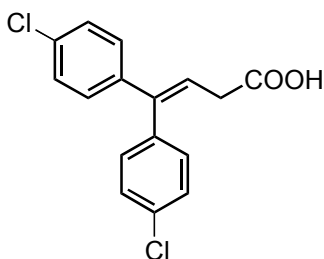

**1b**

Yellow solid; m.p.: 106–108 °C; yield: 58% (89 mg, 0.29 mmol); <sup>1</sup>H NMR (400 MHz, CDCl<sub>3</sub>): δ = 3.22 (d, *J* = 7.6 Hz, 2H, CH<sub>2</sub>), 6.24 (t, *J* = 7.4 Hz, 1H, CH), 7.13 (td, *J*<sub>1</sub> = 2.2 & *J*<sub>2</sub> = 8.4 Hz, 2H, ArH), 7.18 (td, *J*<sub>1</sub> = 2.2 & *J*<sub>2</sub> = 8.4 Hz, 2H, ArH), 7.26-7.29 (m,

2H, ArH), 7.40 (td,  $J_1 = 2.2$  &  $J_2 = 8.4$  Hz, 2H, ArH) ppm;  $^{13}\text{C}$  NMR (100 MHz,  $\text{CDCl}_3$ ):  $\delta = 35.6, 120.8, 128.9$  (2C), 129.1 (2C), 129.3 (2C), 131.5 (2C), 134.2, 134.3, 137.4, 140.2, 143.7, 178.3 ppm; IR (film):  $\nu = 3428, 1702, 1498, 1406, 1043, 1015, 918, 743$   $\text{cm}^{-1}$ ; HRMS (NSI):  $m/z$   $[\text{M-COOH}]^+$  calcd for  $\text{C}_{16}\text{H}_{11}\text{Cl}_2$ : 261.0237; found 261.0235.

**(*E/Z*)-4-(4-bromophenyl)-4-phenylbut-3-enoic acid (1c):**

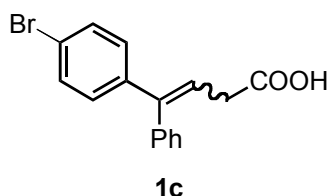

Yellow oil; yield: 75% (118 mg, 0.335 mmol);  $^1\text{H}$  NMR (400 MHz,  $\text{CDCl}_3$ ):  $\delta = 3.22$  (d,  $J = 7.2$  Hz, 2H,  $\text{CH}_2$ ), 3.23 (d,  $J = 7.2$  Hz, 2H,  $\text{CH}_2$ ), 6.25 (t,  $J = 7.2$  Hz, 1H, CH), 6.27 (t,  $J = 7.2$  Hz, 1H, CH), 7.10 (d,  $J = 7.6$  Hz, 2H, ArH), 7.15 (d,  $J = 8.4$  Hz, 2H, ArH), 7.17-7.20 (m, 2H, ArH), 7.24-7.32 (m, 4H, ArH), 7.37-7.43 (m, 6H, ArH), 7.56 (d,  $J = 8.4$  Hz, 2H, ArH) ppm;  $^{13}\text{C}$  NMR (100 MHz,  $\text{CDCl}_3$ ):  $\delta = 35.2, 120.02, 120.04, 121.7, 121.8, 127.4$  (2C), 127.8 (2C), 128.3 (2C), 128.6 (2C), 129.1 (2C), 129.7 (2C), 131.3 (2C), 131.5 (2C), 131.7 (2C), 137.9, 138.5, 140.7, 141.3, 144.29, 144.31, 178.0, 178.1 ppm (both isomers in 1:1 ratio); IR (film):  $\nu = 3428, 2993, 2943, 1706, 1483, 1448, 1035$   $\text{cm}^{-1}$ ; HRMS (NSI):  $m/z$   $[\text{M-COOH}]^+$  calcd for  $\text{C}_{15}\text{H}_{12}\text{Br}$ : 271.0128; found 271.0123.

**Synthesis of 1d and 1g:**

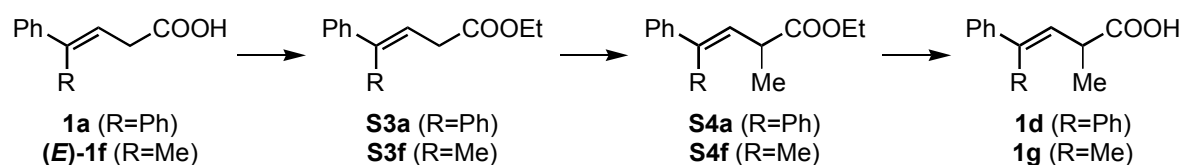

**General procedure for the synthesis of ethyl 4,4-diphenylbut-3-enoate (S3a) and (*E*)-ethyl 4-phenylpent-3-enoate (S3f):**

A mixture of acids **1a** or (*E*)-**1f** (1.0 mmol), thionyl chloride (0.2 mL, 3.0 mmol) and ethanol (3.50 mL, 60 mmol) was stirred at room temperature for 2-4 h. The reaction was monitored by TLC. After the completion of reaction, ethanol was removed under

vacuum, water (5 mL) was added and the mixture extracted with dichloromethane (3 x 5 mL). The combined organic extracts were washed with brine, dried over MgSO<sub>4</sub>, filtered and concentrated under vacuum. The crude products were purified by column chromatography by using dichloromethane / hexane (1:1) as eluent.

**Ethyl 4,4-diphenylbut-3-enoate (S3a):**<sup>[9]</sup>

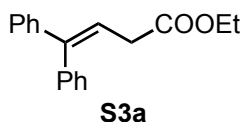

Colorless oil; yield: 97% (516 mg, 1.94 mmol); <sup>1</sup>H NMR (400 MHz, CDCl<sub>3</sub>): δ = 1.26 (t, *J* = 7.2 Hz, 3H, Me), 3.15 (d, *J* = 7.6 Hz, 2H, CH<sub>2</sub>), 4.15 (q, *J* = 7.2 Hz, 1H, CH<sub>2</sub>), 6.26 (t, *J* = 7.2 Hz, 1H, CH), 7.17-7.20 (m, 2H, ArH), 7.25-7.27 (m, 5H, ArH), 7.32-7.40 (m, 3H, ArH) ppm; <sup>13</sup>C NMR (100 MHz, CDCl<sub>3</sub>): δ = 14.7, 36.0, 61.2, 121.0, 127.8 (2C), 127.9 (2C), 128.6 (2C), 128.8 (2C), 130.2 (2C), 139.7, 142.4, 145.0, 172.4 ppm.

**(*E*)-Ethyl 4-phenylpent-3-enoate (S3f):**<sup>[10]</sup>

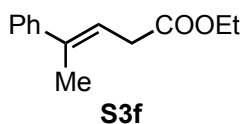

Colorless oil; yield: 99% (404 mg, 1.98 mmol); <sup>1</sup>H NMR (400 MHz, CDCl<sub>3</sub>): δ = 1.18 (t, *J* = 7.2 Hz, 3H, Me), 1.96 (d, *J* = 1.2 Hz, 3H, Me), 3.15 (dd, *J*<sub>1</sub> = 0.8, *J*<sub>2</sub> = 7.2 Hz, 2H, CH<sub>2</sub>), 4.08 (q, *J* = 7.2 Hz, 1H, CH<sub>2</sub>), 5.87 (qt, *J*<sub>1</sub> = 1.2, *J*<sub>2</sub> = 7.2 Hz, 1H, CH), 7.14 (tt, *J*<sub>1</sub> = 1.2, *J*<sub>2</sub> = 7.2 Hz, 1H, ArH), 7.20-7.24 (m, 2H, ArH), 7.30-7.33 (m, 2H, ArH) ppm; <sup>13</sup>C NMR (100 MHz, CDCl<sub>3</sub>): δ = 14.7, 16.7, 35.0, 61.2, 119.8, 126.3 (2C), 127.5, 128.7 (2C), 138.4, 143.6, 172.3 ppm.

**General procedure for the synthesis of ethyl 2-methyl-4,4-diphenylbut-3-enoate (S4a) and (*E*)-ethyl 2-methyl-4-phenylpent-3-enoate (S4f):**

The solution of β,γ-unsaturated esters **S3a** or **S3f** (1.0 mmol) in THF was added to the solution of *t*-BuOK (134 mg, 1.2 mmol) in dry THF (5 mL) at -78°C under argon atmosphere and methyl iodide (0.09 mL, 1.5 mmol) was added after 5 min. The reaction was allowed to warm up to room temperature and stirring was continued for 6 h. The



reaction was monitored by TLC. After completion of the reaction, THF was removed under vacuum and water (5.0 mL) was added. The reaction mixture was extracted with dichloromethane (3 x 5 mL). The combined organic layers were washed with brine, dried over MgSO<sub>4</sub> and evaporated to give a crude product. Finally, the crude product was purified by column chromatography using dichloromethane / hexane (1:1) as eluent.

**Ethyl 2-methyl-4,4-diphenylbut-3-enoate (S4a):**

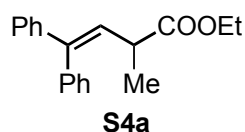

Colorless oil; yield: 93% (260 mg, 0.93 mmol); <sup>1</sup>H NMR (400 MHz, CDCl<sub>3</sub>): δ = 1.26 (t, *J* = 7.2 Hz, 3H, Me), 1.27 (t, *J* = 6.8 Hz, 3H, Me), 3.27 (dq, *J*<sub>1</sub> = 6.8 & *J*<sub>2</sub> = 10.4 Hz, 1H, CH), 4.14 (q, *J* = 7.2 Hz, 1H, CH<sub>2</sub>), 6.13 (d, *J* = 10.4 Hz, 1H, CH), 7.20-7.27 (m, 7H, ArH), 7.34-7.34 (m, 3H, ArH) ppm; <sup>13</sup>C NMR (100 MHz, CDCl<sub>3</sub>): δ = 14.7, 19.0, 40.9, 61.1, 127.76, 127.81 (3C), 128.4, 128.6 (2C), 128.8 (2C), 130.2 (2C), 139.8, 142.3, 143.4, 175.4 ppm; IR (film): ν = 2967, 2933, 2875, 1736, 1731, 1258, 1083, 1057, 913, 748 cm<sup>-1</sup>; HRMS (NSI): *m/z* [M+1]<sup>+</sup> calcd for C<sub>19</sub>H<sub>21</sub>O<sub>2</sub>: 281.1536; found 281.1542.

**(E)-Ethyl 2-methyl-4-phenylpent-3-enoate (S4f):**

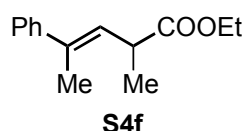

Colorless oil; yield: 84% (183 mg, 0.84 mmol); <sup>1</sup>H NMR (400 MHz, CDCl<sub>3</sub>): δ = 1.16 (t, *J* = 7.2 Hz, 3H, Me), 1.23 (d, *J* = 7.2 Hz, 3H, Me), 1.99 (d, *J* = 1.2 Hz, 3H, Me), 3.42 (dq, *J*<sub>1</sub> = 6.8, *J*<sub>2</sub> = 9.2 Hz, 1H, CH), 4.05 (q, *J* = 7.2 Hz, 1H, CH<sub>2</sub>), 5.70 (qd, *J*<sub>1</sub> = 1.2, *J*<sub>2</sub> = 9.2 Hz, 1H, CH), 7.14 (tt, *J*<sub>1</sub> = 1.2, *J*<sub>2</sub> = 7.2 Hz, 1H, ArH), 7.19-7.23 (m, 2H, ArH), 7.28-7.31 (m, 2H, ArH) ppm; <sup>13</sup>C NMR (100 MHz, CDCl<sub>3</sub>): δ = 13.2, 15.1, 17.0, 38.7, 59.6, 124.8 (2C), 126.0, 126.1, 127.2 (2C), 135.6, 142.1, 173.9 ppm; IR (film): ν = 2977, 2933, 2874, 1737, 1484, 1452, 1406, 1371, 1320, 1257, 1189, 1143, 1126, 1083, 1057, 761 cm<sup>-1</sup>; HRMS (APCI): *m/z* [M+1]<sup>+</sup> calcd for C<sub>14</sub>H<sub>19</sub>O<sub>2</sub>: 219.1382; found 219.1385.

**General procedure for the synthesis of 2-methyl-4,4-diphenylbut-3-enoic acid (1d) and (E)-2-methyl-4-phenylpent-3-enoic acid (1g):**

The mixture of compound **S4a** or **S4f** (0.5 mmol) and LiOH•H<sub>2</sub>O (63 mg, 1.5 mmol) in 6 mL of THF/MeOH/H<sub>2</sub>O (4:1:1, v:v:v) was stirred at room temperature for 2 h. The reaction was monitored by TLC. After the completion of reaction, the mixture was acidified by dropwise addition of 1 M HCl solution up to pH 2-3. The reaction mixture was extracted with dichloromethane (3 x 5 mL). The combined organic layers were washed with brine, dried over anhydrous MgSO<sub>4</sub> and evaporated under reduced pressure. The crude product was used in cyclization reactions without any further purification.

**2-Methyl-4,4-diphenylbut-3-enoic acid (1d):**<sup>[11]</sup>

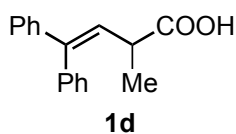

Colorless solid; m.p.: 146 °C; yield: 99% (249 mg, 0.99 mmol); <sup>1</sup>H NMR (400 MHz, CDCl<sub>3</sub>): δ = 1.23 (d, *J* = 6.8, Hz, 3H, Me), 3.25 (dq, *J*<sub>1</sub> = 6.8 & *J*<sub>2</sub> = 10.4 Hz, 1H, CH), 6.03 (d, *J* = 10.4 Hz, 1H, CH), 7.13-7.21 (m, 7H, ArH), 7.27-7.34 (m, 3H, ArH), 11.64 (brs, 1H, COOH) ppm; <sup>13</sup>C NMR (100 MHz, CDCl<sub>3</sub>): δ = 18.8, 40.7, 127.4, 127.8 (2C), 127.9, 128.0, 128.6 (2C), 128.9 (2C), 130.2 (2C), 139.6, 142.1, 144.1, 181.9 ppm.

**(E)-4-Phenylbut-3-enoic acid (1e):**<sup>[12]</sup>

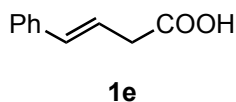

Yellow solid; m.p.: 80–82 °C; yield: 71% (115 mg, 0.71 mmol); <sup>1</sup>H NMR (400 MHz, CDCl<sub>3</sub>): δ = 3.34 (dd, *J*<sub>1</sub> = 1.4 & *J*<sub>2</sub> = 6.8 Hz, 2H, CH<sub>2</sub>), 6.32 (td, *J*<sub>1</sub> = 6.8, *J*<sub>2</sub> = 16.0 Hz, 1H, CH), 6.56 (d, *J* = 16.0 Hz, 1H, CH), 7.25-7.30 (m, 1H, ArH), 7.33-7.37 (m, 2H, ArH), 7.40-7.43 (m, 2H, ArH) ppm; <sup>13</sup>C NMR (100 MHz, CDCl<sub>3</sub>): δ = 38.1, 120.8, 126.4 (2C), 127.8, 128.6 (2C), 134.0, 136.6, 178.3 ppm.

**(E)-4-Phenylpent-3-enoic acid [(E)-1f]:**<sup>[13]</sup>

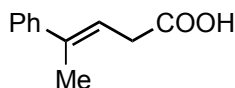

**(E)-1f**

Colorless solid; m.p.: 86–88 °C; yield: 73% (128 mg, 0.73 mmol); <sup>1</sup>H NMR (500 MHz, CDCl<sub>3</sub>): δ = 2.10 (d, *J* = 1.0 Hz, 3H, Me), 3.34 (dd, *J*<sub>1</sub> = 1.0, *J*<sub>2</sub> = 7.0 Hz, 2H, CH<sub>2</sub>), 5.97 (qt, *J*<sub>1</sub> = 1.2, *J*<sub>2</sub> = 7.0 Hz, 1H, CH), 7.28 (tt, *J*<sub>1</sub> = 1.2, *J*<sub>2</sub> = 7.2 Hz, 1H, ArH), 7.33–7.37 (m, 2H, ArH), 7.42–7.45 (m, 2H, ArH) ppm; <sup>13</sup>C NMR (125 MHz, CDCl<sub>3</sub>): δ = 16.3, 34.1, 118.4, 125.8 (2C), 127.2, 128.3 (2C), 138.8, 143.0, 178.0 ppm.

**(Z)-4-Phenylpent-3-enoic acid [(Z)-1f]:**<sup>[14]</sup>

The solution of (*E*)-4-phenylpent-3-enoic acid [(*E*)-1f] (352 mg, 2.0 mmol) in heptane (60 mL) was placed in a pyrex photochemical reactor and irradiated for 8 h using a mercury medium pressure lamp (400 W). After 5 h, 75% of (*E*)-isomer was converted into the (*Z*)-isomer, but further 3 h irradiation did not change the ratio. The reaction was monitored by <sup>1</sup>H NMR. The solvent was removed under vacuum and the crude mixture was purified by a Biotage Isolera system (25 g silica cartridge) using ethyl acetate / hexane (1:9) with a 25 mL/min flow rate.

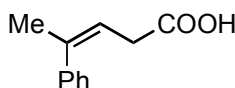

**(Z)-1f**

Colorless oil; yield: 71% (250 mg, 1.42 mmol); <sup>1</sup>H NMR (400 MHz, CDCl<sub>3</sub>): δ = 2.13 (d, *J* = 1.2 Hz, 3H, Me), 3.10 (dd, *J*<sub>1</sub> = 1.2, *J*<sub>2</sub> = 7.2 Hz, 2H, CH<sub>2</sub>), 5.68 (qt, *J*<sub>1</sub> = 1.2, *J*<sub>2</sub> = 7.2 Hz, 1H, CH), 7.21–7.23 (m, 2H, ArH), 7.28–7.33 (m, 1H, ArH), 7.37–7.41 (m, 2H, ArH) ppm; <sup>13</sup>C NMR (100 MHz, CDCl<sub>3</sub>): δ = 26.1, 35.0, 118.0, 127.6, 128.2 (2C), 128.8 (2C), 141.3, 141.5, 179.5 ppm.

**(E)-2-Methyl-4-phenylpent-3-enoic acid (1g):**<sup>[15]</sup>

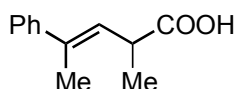

**1g**

Colorless oil; yield: 99% (94 mg, 0.595 mmol);  $^1\text{H}$  NMR (400 MHz,  $\text{CDCl}_3$ ):  $\delta = 1.26$  (d,  $J = 6.8$  Hz, 3H, Me), 2.01 (d,  $J = 1.6$  Hz, 3H, Me), 3.45 (dq,  $J_1 = 6.8$  &  $J_2 = 9.2$  Hz, 1H, CH), 5.68 (dd,  $J_1 = 1.2$  &  $J_2 = 9.2$  Hz, 1H, CH), 7.12-7.16 (m, 1H, ArH), 7.21 (t,  $J = 7.6$  Hz, 2H, ArH), 7.28-7.31 (m, 2H, ArH) ppm;  $^{13}\text{C}$  NMR (100 MHz,  $\text{CDCl}_3$ ):  $\delta = 15.2, 16.8, 38.5, 124.8$  (2C), 125.1, 126.2, 127.2 (2C), 136.4, 141.9, 180.7 ppm.

### Synthesis of 1i:

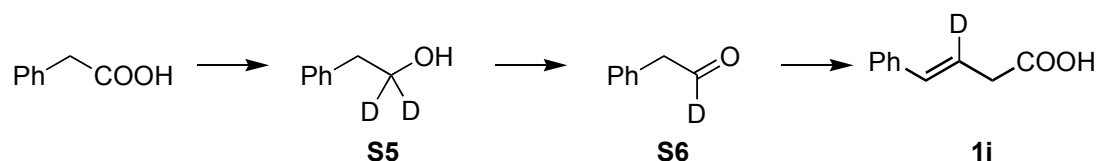

### [1,1- $^2\text{H}_2$ ]-2-Phenylethanol (S5):<sup>[16]</sup>

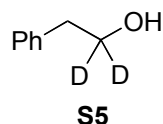

$\text{LiAlD}_4$  (126 mg, 3.0 mmol) was suspended in dry diethyl ether (5 mL) and the solution of phenyl acetic acid (272 mg, 2.0 mmol) in diethyl ether (1 mL) was added dropwise at 0 °C under argon atmosphere and then stirred for 15 min. The reaction was warmed up to room temperature and stirring was continued for 2 h at the same temperature. The reaction was monitored by TLC. After completion of the reaction, the reaction was quenched by dropwise addition water at 0 °C and extracted with diethyl ether (3 x 5 mL). The combined organic layers were dried over  $\text{MgSO}_4$ , filtered and concentrated under reduced pressure. The crude product was purified by column chromatography by using dichloromethane / hexane (1:1) as eluent.

Colorless oil; yield: 52% (129 mg, 1.04 mmol);  $^1\text{H}$  NMR (400 MHz,  $\text{CDCl}_3$ ):  $\delta = 2.55$  (brs, 1H, OH), 2.75 (s, 2H,  $\text{CH}_2$ ), 7.16 (t,  $J = 7.8$  Hz, 3H, ArH), 7.22-7.26 (m, 2H, ArH) ppm;  $^{13}\text{C}$  NMR (100 MHz,  $\text{CDCl}_3$ ):  $\delta = 37.9, 61.1$  ( $J_{\text{C-D}} = 21.8$  Hz), 125.3, 127.5, 128.0, 137.6 ppm.

### (E)-[3- $^2\text{H}$ ]- 4-Phenylbut-3-enoic acid (1i):

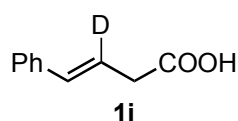

To a solution of IBX (420 mg, 1.5 mmol) in DMSO (5 mL) [1,1-<sup>2</sup>H<sub>2</sub>]-2-phenylethanol **S5** (120 mg, 1.0 mmol) was added and stirred at room temperature for 20 h. The reaction was monitored by TLC. After the completion of reaction, water (5 mL) was added at 0 °C and a white precipitate was obtained. The precipitate was filtered off and discarded while the filtrate was extracted with dichloromethane (3 x 5 mL). The combined organic layers were washed with water, brine, dried over MgSO<sub>4</sub>, filtered and concentrated under reduced pressure. The crude aldehyde **S6** was used in next step without any further purification. In the next step, the crude product was mixed with malonic acid (104 mg, 1.0 mmol) and pyridine (0.082 mL, 1.0 mmol) and heated at 95 °C for overnight. After the completion of reaction, the reaction mixture was cooled to room temperature, the cooled mixture was dissolved in Et<sub>2</sub>O (5 mL) and extracted with 2 M aqueous NaOH solution (3 x 5 mL). The organic layer was discarded and the aqueous extract was acidified by dropwise addition of concentrated sulfuric acid up to pH 1-2. The acidified aqueous layer was extracted with Et<sub>2</sub>O (3 x 5 mL). The combined organic extracts were washed with saturated brine, dried (MgSO<sub>4</sub>), filtered and concentrated under vacuum. Finally the crude products were purified by column chromatography by using methanol / dichloromethane (1:100) as eluent.

Colorless solid; m.p.: 158–160 °C; yield: 30% (49 mg, 0.30 mmol); <sup>1</sup>H NMR (400 MHz, CDCl<sub>3</sub>): δ = 3.23 (s, 2H, CH<sub>2</sub>), 6.44 (s, 1H, CH), 7.25-7.30 (m, 1H, ArH), 7.14-7.18 (m, 1H, ArH), 7.22-7.26 (m, 2H, ArH), 7.29-7.32 (m, 2H, ArH) ppm; <sup>13</sup>C NMR (100 MHz, CDCl<sub>3</sub>): δ = 38.4, 120.9 (*J*<sub>C-D</sub> = 23.9 Hz), 126.8 (2C), 128.1, 129.0 (2C), 134.3, 137.0, 178.5 ppm (*E* : *Z* = 84:16); IR (film): ν = 1924, 1733, 1615, 1589, 1484, 1438, 1256, 1060, 1002, 874, 785, 718 cm<sup>-1</sup>; HRMS (NSI) *m/z* [*M*]<sup>+</sup> calcd for C<sub>10</sub>H<sub>9</sub>DO<sub>2</sub>: 163.0744; found 163.0742.

**General procedure for cyclization / rearrangements of unsaturated acids 1a-1i, 5a,b:** A solution of the γ,δ-unsaturated acid **1** (0.2 mmol) in acetonitrile (2 mL) was added to a solution of [bis(trifluoroacetoxy)iodo]benzene (86 mg, 0.2 mmol) and TMSOTf (0.072 mL, 0.4 mmol) in acetonitrile (2 mL) at room temperature. The reaction was monitored by TLC and is usually complete within 30 min. Acetonitrile was removed in vacuo, water (5 mL) was added and the mixture extracted with dichloromethane (3 x 5 mL). The combined organic layers were dried over MgSO<sub>4</sub>,

filtered and concentrated in vacuo. The product mixture was purified by column chromatography using dichloromethane as eluent.

**General procedure for asymmetric cyclization / rearrangements of unsaturated acids **1a** and **1f**:** A solution of the  $\gamma,\delta$ -unsaturated acid **1a** or **1f** (0.2 mmol) in dry dichloromethane (2 mL) was added to a solution of (2*R*,2'*R*)-2,2'-{[2-(diacetoxy)iodo-1,3-phenylene]bis(oxy)}bis(*N*-mesitylpropanamide) (100 mg, 0.2 mmol) and TMSOTf (0.072 mL, 0.4 mmol) in dichloromethane (2 mL) at  $-78$  °C and stirred for 48 h. The reaction was monitored by TLC. Dichloromethane was removed in vacuo, water (5 mL) was added and the mixture extracted with  $\text{CH}_2\text{Cl}_2$  (3 x 5 mL). The combined organic layers were dried over  $\text{MgSO}_4$ , filtered and concentrated in vacuo. The product mixture was purified by column chromatography using dichloromethane as eluent and product **2a** was isolated in 28% yield with 0% *ee* (HPLC conditions: Chiracel OD-H, hexane:2-propanol 9:1, 0.5 mL/min,  $R_f$  = 37.6 min, 41.2 min). Furthermore, the same reaction was performed with (*E*)-4-phenylpent-3-enoic acid (**E**)-**1f** using the same combination of (2*R*,2'*R*)-2,2'-{[2-(diacetoxy)iodo-1,3-phenylene]bis(oxy)}bis(*N*-mesitylpropanamide) (100 mg, 0.2 mmol) and TMSOTf (0.072 mL, 0.4 mmol) in acetonitrile for 2 h at room temperature and the rearranged product **2f** was isolated in 73% yield but as an almost racemic mixture (1% *ee*) (HPLC conditions: Chiracel OD-H, hexane:2-propanol 9:1, 0.5 mL/min,  $R_f$  = 36.0 min, 38.3 min).

**4,5-Diphenylfuran-2(5*H*)-one (**2a**):**<sup>[17]</sup>

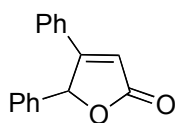

**2a**

Yellow solid; mp 152-154 °C; yield: 93% (44 mg, 0.186 mmol);  $^1\text{H}$  NMR (400 MHz,  $\text{CDCl}_3$ ):  $\delta$  = 6.33 (d,  $J$  = 1.6 Hz, 1H, CH), 6.55 (d,  $J$  = 1.6 Hz, 1H, CH), 7.30–7.49 (m, 10H, ArH) ppm;  $^{13}\text{C}$  NMR (100 MHz,  $\text{CDCl}_3$ ):  $\delta$  = 84.8, 115.1, 128.0 (2C), 128.4 (2C), 129.5 (2C), 129.6 (2C), 130.1, 131.7, 135.3, 166.2, 173.1 ppm.

**4,5-Bis(4-chlorophenyl)furan-2(5H)-one (2b):**<sup>[18]</sup>

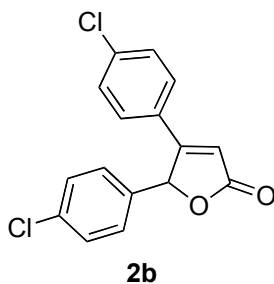

Yellow solid; mp 124-126 °C; yield: 95% (58 mg, 0.19 mmol); <sup>1</sup>H NMR (400 MHz, CDCl<sub>3</sub>): δ = 6.27 (d, *J* = 1.6 Hz, 1H, CH), 6.54 (d, *J* = 1.6 Hz, 1H, CH), 7.23 (d, *J*<sub>1</sub> = 2.0 & *J*<sub>2</sub> = 8.8 Hz, 2H, ArH), 7.33–7.35 (m, 6H, ArH) ppm; <sup>13</sup>C NMR (100 MHz, CDCl<sub>3</sub>): δ = 83.3, 115.2, 127.9, 128.8 (2C), 129.2 (2C), 129.5 (2C), 129.6 (2C), 133.1, 135.9, 137.7, 164.1, 172.0 ppm.

**5-(4-Bromophenyl)-4-phenylfuran-2(5H)-one and 4-(4-Bromophenyl)-5-phenylfuran-2(5H)-one (2c):**

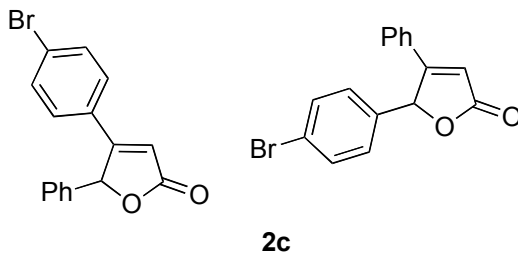

Yellow oil; yield: 88% (55 mg, 0.176 mmol); mixture of two isomers was observed in a 1:1 ratio <sup>1</sup>H NMR (400 MHz, CDCl<sub>3</sub>): δ = 6.07 (d, *J* = 1.6 Hz, 1H, CH), 6.08 (d, *J* = 1.2 Hz, 1H, CH), 6.32 (d, *J* = 1.2 Hz, 1H, CH), 6.33 (d, *J* = 1.6 Hz, 1H, CH), 6.97 (d, *J* = 8.4 Hz, 2H, 2ArH), 7.03–7.08 (m, 4H, ArH), 7.12–7.18 (m, 8H, ArH), 7.23–7.26 (m, 4H, ArH) ppm; <sup>13</sup>C NMR (100 MHz, CDCl<sub>3</sub>): δ = 84.4, 84.2, 114.8, 115.2, 123.9, 125.9, 127.6 (2C), 127.9 (2C), 128.6, 129.0 (2C), 129.2 (2C), 129.3 (2C), 129.4, 129.6 (2C), 129.9, 131.5, 132.37 (2C), 132.42 (2C), 134.0, 134.6, 164.6, 165.6, 172.3, 172.4 ppm; IR (film): ν = 3480, 1747, 1617, 1496, 1449, 1307, 1167, 1036, 984 cm<sup>-1</sup>; HRMS (API): *m/z* [M]<sup>+</sup> calcd for C<sub>15</sub>H<sub>11</sub>BrO<sub>2</sub>: 313.9942; found 313.9947.

**4,5-Diphenylfuran-2(5H)-one (2d):**<sup>[19]</sup>

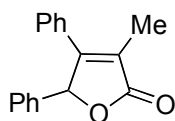

**2d**

Colorless oil; yield: 81% (40 mg, 0.162 mmol); <sup>1</sup>H NMR (400 MHz, CDCl<sub>3</sub>): δ = 2.16 (d, *J* = 1.6 Hz, 3H, Me), 6.19 (q, *J* = 1.6 Hz, 1H, CH), 7.20–7.23 (m, 2H, ArH), 7.25–7.30 (m, 5H, ArH), 7.33–7.36 (m, 3H, ArH) ppm; <sup>13</sup>C NMR (100 MHz, CDCl<sub>3</sub>): δ = 10.8, 84.2, 124.6, 128.0 (2C), 128.5 (2C), 129.2 (2C), 129.3 (2C), 129.7, 130.1, 131.8, 135.5, 158.8, 175.0 ppm.

**4-Phenylfuran-2(5H)-one (2e):**<sup>[20]</sup>

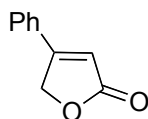

**2e**

Colorless solid; mp 92-94 °C; yield: 78% (25 mg, 0.156 mmol); <sup>1</sup>H NMR (400 MHz, CDCl<sub>3</sub>): δ = 5.23 (d, *J* = 1.8 Hz, 2H, CH<sub>2</sub>), 6.38 (t, *J* = 1.8 Hz, 1H, CH), 7.46–7.52 (m, 5H, ArH) ppm; <sup>13</sup>C NMR (125 MHz, CDCl<sub>3</sub>): δ = 71.0, 113.2, 126.4 (2C), 129.3 (2C), 129.8, 131.8, 163.8, 173.7 ppm.

**5-Methyl-4-phenylfuran-2(5H)-one (2f):**<sup>[21]</sup>

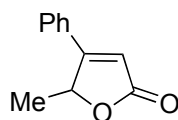

**2f**

Colorless solid; mp 50-52 °C; yield: 89% (31 mg, 0.178 mmol); <sup>1</sup>H NMR (400 MHz, CDCl<sub>3</sub>): δ = 1.54 (d, *J* = 5.2 Hz, 3H, Me), 5.57 (dq, *J*<sub>1</sub> = 1.2 Hz, *J*<sub>2</sub> = 5.6 Hz, 1H, CH), 6.28 (d, *J* = 1.2 Hz, 1H, CH), 7.45–7.50 (m, 5H, ArH) ppm; <sup>13</sup>C NMR (125 MHz, CDCl<sub>3</sub>): δ = 19.8, 78.6, 113.8, 127.2 (2C), 129.2 (2C), 130.0, 131.3, 168.9, 172.5 ppm.



**3,5-Dimethyl-4-phenylfuran-2(5H)-one (2g):**<sup>[22]</sup>

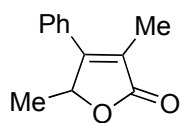

**2g**

Yellow solid; mp 72–74 °C; yield: 87% (33 mg, 0.174 mmol); <sup>1</sup>H NMR (400 MHz, CDCl<sub>3</sub>): δ = 1.37 (d, *J* = 6.8, 3H, Me), 2.05 (d, *J* = 1.6, 3H, Me), 5.41 (qq, *J*<sub>1</sub> = 1.6 & *J*<sub>2</sub> = 6.8 Hz, 1H, CH), 7.33–7.36 (m, 2H, ArH), 7.44–7.51 (m, 3H, ArH) ppm; <sup>13</sup>C NMR (100 MHz, CDCl<sub>3</sub>): δ = 10.5, 19.7, 78.6, 123.6, 128.2 (2C), 129.5 (2C), 130.2, 131.9, 161.0, 174.9 ppm.

**5-Methylfuran-2(5H)-one (2h):**<sup>[23]</sup>

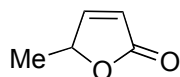

**2h**

Colorless oil; yield: 81% (28 mg, 0.162 mmol); <sup>1</sup>H NMR (500 MHz, CDCl<sub>3</sub>): δ = 1.37 (d, *J* = 6.8 Hz, 3H, Me), 5.05 (tq, *J*<sub>1</sub> = 1.6 Hz, *J*<sub>2</sub> = 6.8 Hz, 1H, CH), 6.01 (dd, *J*<sub>1</sub> = 2.0 Hz, *J*<sub>2</sub> = 5.6 Hz, 1H, CH), 7.37 (dd, *J*<sub>1</sub> = 1.2 Hz, *J*<sub>2</sub> = 5.6 Hz, 1H, CH) ppm.

**5-[<sup>2</sup>H]-4-Phenylfuran-2(5H)-one (2i):**

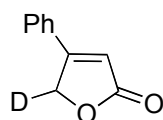

**2i**

Colorless oil; yield: 58% (9 mg, 0.058 mmol); <sup>1</sup>H NMR (500 MHz, CDCl<sub>3</sub>): δ = 6.02 (d, *J* = 2.0 Hz, 1H, CH), 6.23 (d, *J* = 2.0 Hz, 1H, CH), 7.26–7.28 (m, 2H, ArH), 7.37–7.41 (m, 3H, ArH) ppm; <sup>13</sup>C NMR (125 MHz, CDCl<sub>3</sub>): δ = 29.7, 120.9, 126.5 (2C), 129.1 (2C), 129.3, 144.0, 153.2, 172.4 ppm; HRMS (NSI) *m/z* [M]<sup>+</sup> calcd for C<sub>10</sub>H<sub>7</sub>DO<sub>2</sub>: 161.0587; found 161.0587.

**4-Oxo-3,4-diphenylbutanoic acid (3a):**<sup>[24]</sup>

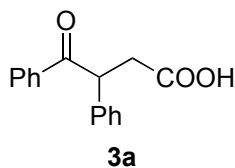

Colorless solid; mp 152–154 °C; yield: 92% (47 mg, 0.184 mmol); <sup>1</sup>H NMR (500 MHz, CDCl<sub>3</sub>): δ = 2.72 (dd,  $J_1 = 9.5$  Hz,  $J_2 = 34.5$  Hz 1H, CH), 3.39 (dd,  $J_1 = 19.5$  Hz,  $J_2 = 34.5$  Hz 1H, CH), 5.03 (dd,  $J_1 = 9.5$  Hz,  $J_2 = 19.5$  Hz 1H, CH), 7.19-7.28 (m, 4H, ArH), 7.32-7.46 (m, 4H, ArH), 7.91-7.96 (m, 2H, ArH) ppm; <sup>13</sup>C NMR (125 MHz, CDCl<sub>3</sub>): δ = 38.3, 49.5, 127.6, 128.1 (2C), 128.5 (2C), 128.9 (2C), 129.3 (2C), 133.0, 136.1, 137.9, 177.3, 198.3 ppm.

**4-Oxo-3-phenylpentanoic acid (3f):**<sup>[13]</sup>

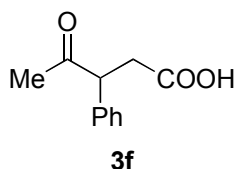

Colorless solid; m.p.: 98–100 °C; yield: 89% (34 mg, 0.178 mmol); <sup>1</sup>H NMR (400 MHz, CDCl<sub>3</sub>): δ = 2.02 (s, 3H, Me), 2.47 (dd,  $J_1 = 4.8$  Hz,  $J_2 = 17.2$  Hz 1H, CH), 3.18 (dd,  $J_1 = 10.0$  Hz,  $J_2 = 17.2$  Hz 1H, CH), 4.07 (dd,  $J_1 = 4.8$  Hz,  $J_2 = 9.6$  Hz 1H, CH), 7.12 (d,  $J = 7.2$  Hz, 2H, ArH), 7.20-7.29 (m, 3H, ArH), 9.97 (brs, 1H, COOH) ppm; <sup>13</sup>C NMR (125 MHz, CDCl<sub>3</sub>): δ = 28.8, 36.7, 54.7, 127.9, 128.2 (2C), 129.3 (2C), 137.2, 177.6, 206.7 ppm.

**3-Methyl-5,5-diphenylfuran-2(5H)-one (4d):**

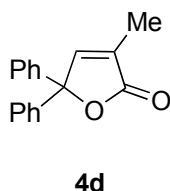

Colorless oil; yield: 16% (8 mg, 0.32 mmol); <sup>1</sup>H NMR (400 MHz, CDCl<sub>3</sub>): δ = 1.90 (s, 3H, Me), 6.64-6.67 (m, 2H, ArH), 7.28–7.38 (m, 6H, 1CH & 5ArH), 7.49 (d,  $J = 8.0$  Hz, 4H, ArH) ppm; <sup>13</sup>C NMR (100 MHz, CDCl<sub>3</sub>): δ = 8.9, 89.7, 125.6, 126.7, 127.2, 127.3, 127.4, 127.6, 128.6, 130.6, 134.2, 160.6, 171.0 ppm; IR (film): ν = 3343, 2966,

2933, 2874, 1736, 1612, 1551, 1488, 1445, 1371, 1258, 1188, 1125, 1083, 1057, 913  $\text{cm}^{-1}$ ; HRMS (API):  $m/z$   $[M]^+$  calcd for  $\text{C}_{17}\text{H}_{14}\text{O}_2$ : 250.0994; found 250.0994.

**5-Methyl-5-phenylfuran-2(5H)-one (4f):**<sup>[13,25]</sup>

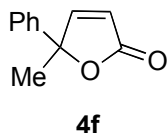

Colorless oil; yield: 81% (28 mg, 0.162 mmol);  $^1\text{H}$  NMR (500 MHz,  $\text{CDCl}_3$ ):  $\delta$  = 1.83 (s, 3H, Me), 6.05 (d,  $J$  = 5.5 Hz, 1H, CH), 7.31–7.38 (m, 5H, ArH), 7.63 (d,  $J$  = 5.5 Hz, 1H, CH) ppm;  $^{13}\text{C}$  NMR (125 MHz,  $\text{CDCl}_3$ ):  $\delta$  = 26.4, 88.9, 119.4, 124.8 (2C), 128.4, 128.9 (2C), 139.3, 160.3, 172.3 ppm.

**5,5-Diphenylpent-4-enoic acid (5a):**<sup>[26]</sup>

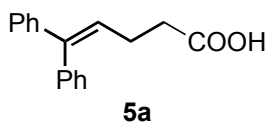

(3-Carboxypropyl)triphenylphosphonium bromide (429 mg, 1.0 mmol) was suspended in THF (15 mL). The colorless suspension was cooled to 0 °C and *n*-BuLi (2.5 M in hexane) (0.8 mL, 2.0 mmol) was added dropwise and the resulting bright orange solution was stirred at 0 °C for 1 h. A solution of benzophenone (218 mg, 1.2 mmol) in THF (5 mL) was added dropwise and the reaction mixture was stirred overnight at room temperature. The reaction was monitored by thin layer chromatography. After completion of the reaction, the solvent was removed under vacuum and reaction mixture was poured into ice-cold water (5 mL). The reaction mixture was acidified by dropwise addition of 1 M HCl up to pH 2-3, after that the reaction mixture was extracted with ethyl acetate (3 x 5 mL). The combined organic layers were dried over  $\text{MgSO}_4$ , filtered and concentrated under reduced pressure. The crude product was purified by column chromatography by using methanol / chloroform (1:99) as eluent.

Colorless solid; m.p.: 74–76 °C; yield: 82% (207 mg, 0.82 mmol);  $^1\text{H}$  NMR (400 MHz,  $\text{CDCl}_3$ ):  $\delta$  = 2.42-2.49 (m, 4H, 2 x  $\text{CH}_2$ ), 6.06 (t,  $J$  = 7.2 Hz, 1H, CH), 7.16-7.37 (m, 10H, ArH) ppm;  $^{13}\text{C}$  NMR (125 MHz,  $\text{CDCl}_3$ ):  $\delta$  = 24.9, 34.2, 126.8, 127.26, 127.19, 127.3 (2C), 128.1 (2C), 128.3 (2C), 129.7 (2C), 139.7, 142.3, 143.4, 179.2 ppm; IR (film):  $\nu$  = 3445, 2918, 1635, 913, 743  $\text{cm}^{-1}$ .

### Synthesis of 5b:

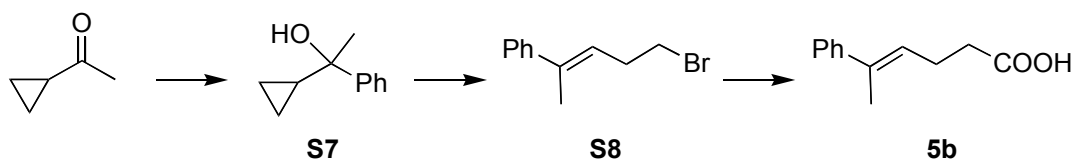

### 1-Cyclopropyl-1-phenylethanol (S7):<sup>[27]</sup>

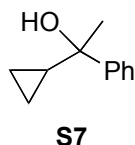

To a magnetically stirred mixture of Mg turnings (6 mmol, 144 mg) and iodine (catalytic amount), a solution of bromobenzene (785 mg, 5 mmol) in dry THF (10 mL) was added dropwise during 10 min and allowed to stir at room temperature for 2 h. Then temperature was decreased to 0 °C and cyclopropyl methyl ketone (5 mmol, 0.465 mL) was added and allowed to stir at room temperature for 1 h. After completion of the reaction, water (5 mL) was added and the reaction mixture was extracted with ethyl acetate (3 x 5 mL). The combined organic layers were dried over MgSO<sub>4</sub>, filtered and concentrated under reduced pressure. The crude product was purified by column chromatography using hexane and chloroform (1:1) as eluent.

Colorless oil; yield: 83% (0.67 g, 4.14 mmol); <sup>1</sup>H NMR (400 MHz, CDCl<sub>3</sub>): δ = 0.31-0.47 (m, 4H, 2 x CH<sub>2</sub>), 1.15-1.22 (m, 1H, CH), 1.42 (s, 3H, Me), 1.54 (brs, 1H, OH), 7.15-7.19 (m, 1H, ArH), 7.24-7.29 (m, 2H, ArH), 7.45-7.47 (m, 2H, ArH) ppm.

### (E)-(5-Bromopent-2-en-2-yl)benzene (S8):<sup>[28]</sup>

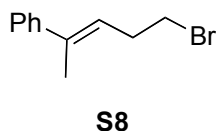

The mixture of 1-cyclopropyl-1-phenylethanol S7 (324 mg, 2 mmol), aq. HBr solution (48%) (0.34 mL, 2 mmol) and lithium bromide (174 mg, 2 mmol) was stirred at 0 °C for 2 h. The reaction was monitored by TLC. After completion of the reaction, the reaction mixture was diluted with water (2 mL) and extracted with ethyl acetate (3 x 5 mL). The combined organic layers were dried over MgSO<sub>4</sub>, filtered and concentrated under

reduced pressure. The crude product was purified by column chromatography by using hexane as eluent.

Colorless oil; yield: 96% (430 mg, 1.92 mmol);  $^1\text{H}$  NMR (400 MHz,  $\text{CDCl}_3$ ):  $\delta$  = 2.09 (s, 3H, Me), 2.82 (q,  $J$  = 7.2 Hz, 2H,  $\text{CH}_2$ ), 3.49 (t,  $J$  = 7.2 Hz, 2H,  $\text{CH}_2$ ), 5.78 (t,  $J$  = 7.2 Hz, 1H, CH), 7.27-7.29 (m, 1H, ArH), 7.35 (t,  $J$  = 7.6 Hz, 2H, ArH), 7.42 (d,  $J$  = 7.6 Hz, 2H, ArH) ppm;  $^{13}\text{C}$  NMR (100 MHz,  $\text{CDCl}_3$ ):  $\delta$  = 16.6, 32.7, 32.8, 124.8, 126.2 (2C), 127.5, 128.7 (2C), 138.2, 143.7 ppm; IR (film):  $\nu$  = 3080, 3056, 3030, 2961, 2921, 2860, 1597, 1494, 1444, 1380, 1304, 1261, 1207, 1061, 1027, 856, 757, 696, 646, 560, 548  $\text{cm}^{-1}$ .

**(*E*)-5-Phenylhex-4-enoic acid (5b):**<sup>[26]</sup>

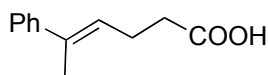

**5b**

To a magnetically stirred mixture of Mg turnings (36 mg, 1.2 mmol) and iodine (catalytic amount) a solution of (*E*)-(5-bromopent-2-en-2-yl)benzene **S6** (224 mg, 1.0 mmol) in dry THF (5 mL) was added dropwise and allowed to heat at reflux temperature for 2 h under nitrogen atmosphere. After 2 h, the reaction was cooled to room temperature and one pellet of dry ice was added. After 30 min stirring at room temperature, water (2 mL) was added and reaction mixture was acidified by 1 M HCl solution. The reaction mixture was extracted with ethyl acetate (3 x 5 mL). The combined organic layers were dried over  $\text{MgSO}_4$ , filtered and concentrated under reduced pressure. The crude product was purified by column chromatography using chloroform as eluent.

Colorless solid; m.p.: 74 °C; yield: 74% (128 mg, 0.74 mmol);  $^1\text{H}$  NMR (400 MHz,  $\text{CDCl}_3$ ):  $\delta$  = 1.98 (s, 3H, Me), 2.41-2.49 (m, 4H, 2 x  $\text{CH}_2$ ), 5.66 (t,  $J$  = 6.4 Hz, 1H, CH), 7.15 (t,  $J$  = 7.4 Hz, 1H, ArH), 7.23 (t,  $J$  = 7.4 Hz, 2H, ArH), 7.29 (d,  $J$  = 7.2 Hz, 2H, ArH), 11.19 (brs, 1H, COOH) ppm;  $^{13}\text{C}$  NMR (100 MHz,  $\text{CDCl}_3$ ):  $\delta$  = 15.9, 24.0, 34.0, 125.6, 125.7 (2C), 126.9, 128.2 (2C), 136.6, 143.5, 179.6 ppm; IR (film):  $\nu$  = 3465, 3031, 1708, 1449, 1444, 1410, 1381, 1027, 913, 758, 696  $\text{cm}^{-1}$ ; HRMS calcd for  $\text{C}_{12}\text{H}_{13}\text{O}_2$ : 189.0921; found 189.0919.

**5,6-Diphenyl-3,4-dihydro-2H-pyran-2-one (6a):**<sup>[29]</sup>

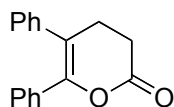

**6a**

Colorless oil; yield: 76% (38 mg, 0.152 mmol); <sup>1</sup>H NMR (500 MHz, CDCl<sub>3</sub>): δ = 2.83-2.85 (m, 4H, 2 x CH<sub>2</sub>), 7.10-7.13 (m, 2H, ArH), 7.16-7.25 (m, 8H, ArH) ppm; <sup>13</sup>C NMR (125 MHz, CDCl<sub>3</sub>): δ = 27.0, 28.9, 116.5, 127.4, 127.9 (2C), 128.57 (2C), 128.59 (4C), 129.0, 130.0, 133.1, 138.5, 147.3, 168.7 ppm; HRMS (API) m/z [M]<sup>+</sup> calcd for C<sub>17</sub>H<sub>15</sub>O<sub>2</sub>: 251.1070; found 251.1067.

**5-Oxo-4-phenylhexanoic acid (6b):**<sup>[29]</sup>

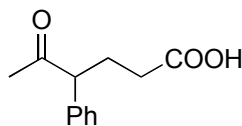

**6b**

Colorless solid; m.p.: 44–46 °C; yield: 79% (33 mg, 0.158 mmol); <sup>1</sup>H NMR (400 MHz, CDCl<sub>3</sub>): δ = 1.87-1.93 (m, 1H, CH<sub>2</sub>), 1.96 (s, 3H, Me), 2.13-2.28 (m, 3H, CH<sub>2</sub>), 3.62 (dd, *J*<sub>1</sub> = 6.8 Hz & *J*<sub>2</sub> = 8.0 Hz 1H, CH), 7.08-7.12 (m, 2H, ArH), 7.16-7.20 (m, 1H, ArH), 7.22-7.26 (m, 2H, ArH), 8.89 (brs, 1H, COOH) ppm; <sup>13</sup>C NMR (100 MHz, CDCl<sub>3</sub>): δ = 26.6, 29.0, 31.4, 58.3, 127.6, 128.3 (2C), 129.2 (2C), 138.0, 178.9, 207.6 ppm; MS (EI): 205.0869.

**General procedure for the synthesis of 6,6-diarylhex-5-enoic acids 8:**

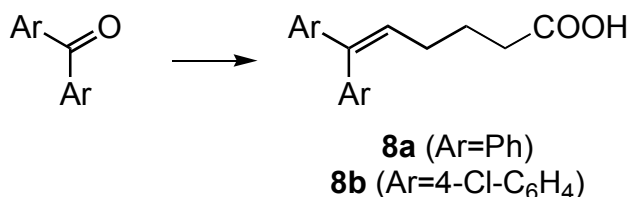

(3-Carboxybutyl)triphenylphosphonium bromide (443 mg, 1.0 mmol) was suspended in THF (15 mL). The colorless suspension was cooled to 0 °C and *n*-BuLi (2.5 M in hexane, 0.8 mL, 2.0 mmol) was added dropwise and the resulting bright orange solution was stirred at 0 °C for 1 h. A solution of the benzophenone (1.2 mmol) in THF (5 mL) was added dropwise and the reaction mixture was stirred overnight at room temperature. The reaction was monitored by thin layer chromatography. After

completion of the reaction, the solvent was removed under vacuum and reaction mixture was poured into ice-cold water. After the acidification with 1 M HCl, the reaction mixture was extracted with ethyl acetate (3 x 5 mL). The combined organic layers were dried over MgSO<sub>4</sub>, filtered and concentrated under reduced pressure. The crude product was purified by column chromatography by using chloroform as eluent.

**6,6-Diphenylhex-5-enoic acid (8a):**<sup>[26a]</sup>

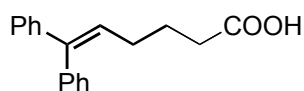

**8a**

White solid; mp 94 °C; yield: 69% (183 mg, 0.69 mmol); <sup>1</sup>H NMR (400 MHz, CDCl<sub>3</sub>): δ = 1.71 (q, *J* = 7.4 Hz, 2H, CH<sub>2</sub>), 2.10 (q, *J* = 7.4 Hz, 2H, CH<sub>2</sub>), 2.26 (t, *J* = 7.4 Hz, 2H, CH<sub>2</sub>), 5.98 (t, *J* = 7.4 Hz, 1H, CH), 7.09 (d, *J* = 7.2 Hz, 2H, ArH), 7.12-7.25 (m, 6H, ArH), 7.29 (t, *J* = 7.4 Hz, 2H, ArH) ppm; <sup>13</sup>C NMR (100 MHz, CDCl<sub>3</sub>): δ = 24.8, 29.1, 33.5, 127.0, 127.2 (2C), 128.1 (2C), 128.2 (2C), 128.4, 129.9 (2C), 140.0, 142.5, 142.7, 179.4 ppm; IR (film): ν = 3497, 1707, 1494, 1443, 759, 700 cm<sup>-1</sup>; HRMS calcd for C<sub>18</sub>H<sub>17</sub>O<sub>2</sub>: 265.1234; found 265.1232.

**6,6-Bis(4-chlorophenyl)hex-5-enoic acid (8b):**

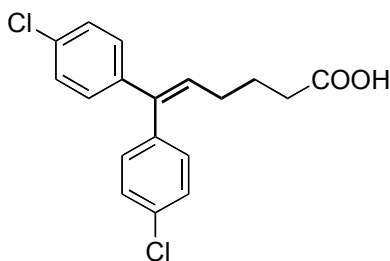

**8b**

Yellow solid; mp 78 °C; yield: (261 mg, 0.78 mmol) 78%; <sup>1</sup>H NMR (400 MHz, CDCl<sub>3</sub>): δ = 1.65 (q, *J* = 7.4 Hz, 2H, CH<sub>2</sub>), 2.03 (q, *J* = 7.4 Hz, 2H, CH<sub>2</sub>), 2.21 (t, *J* = 7.4 Hz, 2H, CH<sub>2</sub>), 5.91 (t, *J* = 7.4 Hz, 1H, CH), 6.96 (dd, *J*<sub>1</sub> = 3.2 Hz & *J*<sub>2</sub> = 8.4 Hz, 4H, ArH), 7.09 (d, *J* = 8.4 Hz, 2H, ArH), 7.21 (d, *J* = 7.6 Hz, 2H, ArH) ppm; <sup>13</sup>C NMR (100 MHz, CDCl<sub>3</sub>): δ = 24.6, 29.1, 33.5, 128.4 (2C), 128.5 (2C), 128.6 (2C), 129.5, 131.2 (2C), 133.1, 133.2, 137.9, 140.5, 140.6, 179.9 ppm; IR (film): ν = 3478, 2952, 1707, 1492,

1403, 1091, 1014, 913, 830, 743  $\text{cm}^{-1}$ ; HRMS calcd for  $\text{C}_{18}\text{H}_{15}\text{O}_2\text{Cl}_2$ : 3330455.1234; found 333.0454.

**2-(Diphenylmethylene)cyclopentanone (9a):**<sup>[30]</sup>

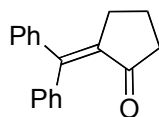

**9a**

Yellow solid; mp 110–112 °C; yield: 90% (45 mg, 0.180 mmol);  $^1\text{H}$  NMR (400 MHz,  $\text{CDCl}_3$ ):  $\delta$  = 1.93 (p,  $J$  = 7.4 Hz, 2H,  $\text{CH}_2$ ), 2.38 (t,  $J$  = 7.8 Hz, 2H,  $\text{CH}_2$ ), 2.82 (t,  $J$  = 7.0 Hz, 2H,  $\text{CH}_2$ ), 7.10-7.13 (m, 2H, ArH), 7.17-7.20 (m, 2H, ArH), 7.28-7.36 (m, 6H, ArH) ppm;  $^{13}\text{C}$  NMR (100 MHz,  $\text{CDCl}_3$ ):  $\delta$  = 20.6, 33.0, 39.8, 127.9 (3C), 128.0 (2C), 128.4, 129.5 (2C), 129.7 (2C), 134.4, 140.2, 141.8, 148.3, 206.6 ppm.

X-Ray structure of **9a**:

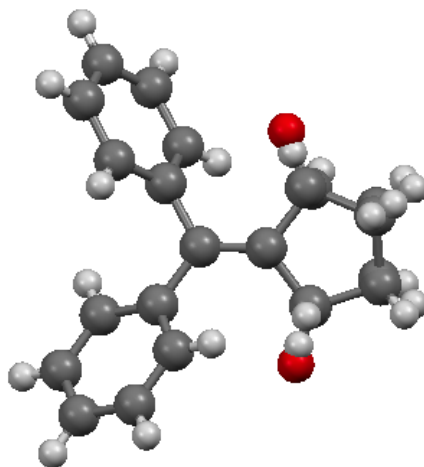

CCDC-883284 [**9a**] contains the supplementary crystallographic data for this paper. These data can be obtained free of charge from The Cambridge Crystallographic Data Centre via [www.ccdc.cam.ac.uk/data\\_request/cif](http://www.ccdc.cam.ac.uk/data_request/cif).



**2-(Bis(4-chlorophenyl)methylene)cyclopentanone (9b):**

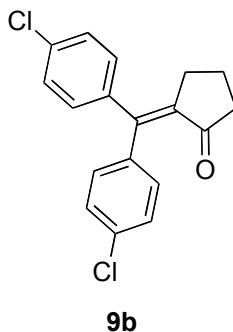

Yellow solid; mp 132–134 °C; yield: 80% (51 mg, 0.160 mmol); <sup>1</sup>H NMR (400 MHz, CDCl<sub>3</sub>): δ = 1.94 (p, *J* = 7.4 Hz, 2H, CH<sub>2</sub>), 2.38 (t, *J* = 7.6 Hz, 2H, CH<sub>2</sub>), 2.79 (t, *J* = 7.0 Hz, 2H, CH<sub>2</sub>), 7.03 (d, *J* = 8.4 Hz, 2H, ArH), 7.10 (d, *J* = 8.4 Hz, 2H, ArH), 7.29 (d, *J* = 8.4 Hz, 2H, ArH), 7.31 (d, *J* = 8.4 Hz, 2H, ArH) ppm; <sup>13</sup>C NMR (100 MHz, CDCl<sub>3</sub>): δ = 20.5, 33.0, 39.8, 128.3 (2C), 128.4 (2C), 130.9 (2C), 131.0 (2C), 134.1, 134.7, 135.1, 138.0, 139.8, 145.6, 206.5 ppm; IR (KBr): 3434, 2953, 2928, 1712, 1582, 1495, 1210, 1091, 804 cm<sup>-1</sup>.

**4-Iodo-5-methyl-5-phenyldihydrofuran-2(3H)-one (22):**<sup>[14]</sup>

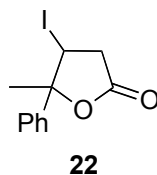

A solution of iodine monochloride (324 mg, 2.0 mmol) in THF (5 mL) was added to a solution of (*E*)-4-phenylpent-3-enoic acid **1f** (176 mg, 1.0 mmol) in THF (5 mL) and stirred at room temperature for 1 h. The reaction was monitored by thin layer chromatography. After completion of the reaction, the solvent was removed under vacuum and reaction mixture was poured into ice-cold water (5 mL). After that the saturated solution of Na<sub>2</sub>S<sub>2</sub>O<sub>3</sub> was added dropwise until the violet color was completely disappeared and the reaction mixture was extracted with dichloromethane (3 x 5 mL). The combined organic layers were dried over MgSO<sub>4</sub>, filtered and concentrated under reduced pressure. The crude product was purified by column chromatography using hexane as eluent.

Light yellow solid; mp 88–90 °C; yield: 76% (229 mg, 0.76 mmol); <sup>1</sup>H NMR (400 MHz, CDCl<sub>3</sub>): δ = 1.94 (s, 3H, Me), 3.02 (dd, *J*<sub>1</sub> = 6.2 Hz, *J*<sub>2</sub> = 18.2 Hz 1H, CH), 3.22

(dd,  $J_1 = 7.4$  Hz,  $J_2 = 18.2$  Hz 1H, CH), 4.65 (dd,  $J_1 = 6.4$  Hz,  $J_2 = 7.2$  Hz 1H, CH), 7.34-7.43 (m, 3H, ArH), 7.43-7.46 (m, 2H, ArH) ppm;  $^{13}\text{C}$  NMR (100 MHz,  $\text{CDCl}_3$ ):  $\delta = 18.2, 31.0, 42.6, 88.5, 124.7$  (2C), 128.9, 129.4 (2C), 141.2, 174.0 ppm;

#### 4-Oxo-3-phenylpentanoic acid (**3f**):<sup>[13]</sup>

Oxone (potassium peroxomonosulfate, 184 mg, 0.3 mmol) was added to solution of 4-iodo-5-methyl-5-phenyldihydrofuran-2(3*H*)-one **22** (60 mg, 0.2 mmol) in chloroform (0.2 mL) and trifluoroacetic acid (0.6 mL) and the reaction mixture was stirred at room temperature for 2 h. The reaction was monitored by thin layer chromatography. After the completion of the reaction, the inorganic material was removed by filtration and the filtrate was concentrated under vacuum. After that the saturated solution of  $\text{Na}_2\text{S}_2\text{O}_3$  was added dropwise until the violet color was completely disappeared and the reaction mixture was extracted with dichloromethane (3 x 5 mL). The combined organic layers were dried over  $\text{MgSO}_4$ , filtered and concentrated under reduced pressure. The crude product was purified by column chromatography using dichloromethane / hexane (4:1) as eluent. The isolated product was characterized as 4-oxo-3-phenylpentanoic acid **3f** which was obtained in 86% yield.

#### (*Z*)-5-(Iodomethylene)-4-phenylfuran-2(5*H*)-one (**23**):<sup>[31]</sup>

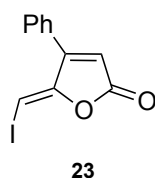

A solution of 4-iodo-5-methyl-5-phenyldihydrofuran-2(3*H*)-one **22** (60 mg, 0.2 mmol) in acetonitrile (2 mL) was added to a solution of [bis(trifluoroacetoxy)iodo]benzene (86 mg, 0.2 mmol) and TMSOTf (0.072 mL, 0.4 mmol) in acetonitrile (2 mL) at room temperature and stirred overnight. The reaction was monitored by TLC. Acetonitrile was removed in vacuo, water (2 mL) was added and the mixture extracted with  $\text{CH}_2\text{Cl}_2$  (3 x 5 mL). The combined organic layers were dried over  $\text{MgSO}_4$ , filtered and concentrated in vacuo. The product mixture was purified by column chromatography using chloroform as eluent.

Colorless solid; mp 78–80 °C; yield: 83% (49 mg, 0.166 mmol);  $^1\text{H}$  NMR (400 MHz,  $\text{CDCl}_3$ ):  $\delta = 6.35$  (s, 1H, CH), 6.44 (s, 1H, CH), 7.43–7.46 (m, 2H, ArH), 7.47-7.53 (m,

3H, ArH) ppm;  $^{13}\text{C}$  NMR (125 MHz,  $\text{CDCl}_3$ ):  $\delta = 65.0, 117.1, 128.8$  (2C),  $129.7$  (2C),  $130.0, 131.4, 155.4, 156.5, 167.6$  ppm.

**1-(Methylsulfonyl)-4-vinylbenzene.**<sup>[32]</sup>

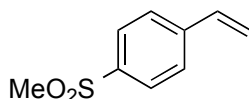

A solution of (methyl)triphenylphosphonium bromide (357 mg, 1.0 mmol) in dimethyl sulfoxide (10 mL) was added dropwise to a stirred suspension of potassium *tert*-butoxide (134 mg, 1.2 mmol) in dimethyl sulfoxide (5 mL) and the resulting bright orange solution was stirred at room temperature for 30 min. A solution of 4-(methylsulfonyl)benzaldehyde (184 mg, 1.0 mmol) in dimethyl sulfoxide (5 mL) was added dropwise and the reaction mixture was stirred overnight at room temperature. The reaction was monitored by thin layer chromatography. After completion of the reaction, the reaction mixture was poured into ice-cold water (10 mL). After the acidification with 1 M HCl, the reaction mixture was extracted with dichloromethane (3 x 10 mL). The organic layer was dried over  $\text{MgSO}_4$ , filtered and concentrated under reduced pressure. The crude product was purified by column chromatography on silica gel by using ethyl acetate / hexane (3:7) as eluent.

Colorless solid; m.p.: 40-42 °C; yield: 67% (122 mg, 0.67 mmol);  $^1\text{H}$  NMR (500 MHz,  $\text{CDCl}_3$ ):  $\delta = 3.05$  (s, 3H,  $\text{SO}_2\text{Me}$ ),  $5.47$  (d,  $J = 11.0$  Hz, 1H, CH),  $5.91$  (d,  $J = 17.5$  Hz, 1H, CH),  $6.77$  (dd,  $J_1 = 11.0, J_2 = 17.5$  Hz, 1H, CH),  $7.57$  (d,  $J = 8.0$  Hz, 2H, ArH),  $7.90$  (d,  $J = 8.5$  Hz, 2H, ArH) ppm;  $^{13}\text{C}$  NMR (125 MHz,  $\text{CDCl}_3$ ):  $\delta = 44.6, 118.0, 127.0$  (2C),  $127.8$  (2C),  $135.2, 139.5, 143.0$  ppm.

**General procedure for the synthesis of (*E*)-2,4-diarylbut-3-enoic acids 24a and 24b:**

A mixture of 2-bromo-2-phenylacetic acid (107 mg, 0.5 mmol), styrene (0.07 mL, 0.6 mmol) [or 1-(methylsulfonyl)-4-vinylbenzene (109 mg, 0.6 mmol)], tributylamine (0.237 mL, 1.0 mmol), palladium acetate (5.6 mg, 0.025 mmol) and triphenylphosphine (13.1 mg, 0.05 mmol) was heated at 100 °C for 24 h. Full conversion was not observed. The reaction mixture was poured into ice-cold water (5 mL), acidified with 1 M HCl and extracted with dichloromethane (3 x 5 mL). The organic layer was dried over  $\text{MgSO}_4$ ,

filtered and concentrated under reduced pressure. The crude product (**24a**) was purified by column chromatography on silica gel by using ethyl acetate / hexane (3:7) while the crude product **24b** was purified by same method using ethyl acetate / hexane (2:3) as eluent.

**(E)-2,4-Diphenylbut-3-enoic acid (24a):**

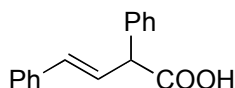

**24a**

Colorless solid; m.p.: 138-140 °C; yield: 49% (58 mg, 0.245 mmol); <sup>1</sup>H NMR (400 MHz, DMSO-d<sub>6</sub>): δ = 5.26 (d, *J* = 6.0 Hz, 1H, CH), 6.40 (dd, *J*<sub>1</sub> = 6.4, *J*<sub>2</sub> = 16.0 Hz, 1H, CH), 6.65 (d, *J* = 16.0 Hz, 1H, CH), 7.19-7.26 (m, 2H, ArH), 7.28-7.36 (m, 4H, ArH), 7.40-7.42 (m, 4H, ArH) ppm; <sup>13</sup>C NMR (100 MHz, CDCl<sub>3</sub>): δ = 76.7, 129.7 (2C), 129.8 (2C), 130.4, 130.9, 131.6, 131.7 (2C), 132.1 (2C), 137.2, 140.1, 147.9, 164.5 ppm; IR (KBr): ν = 2966, 2933, 2875, 1735, 1258, 1083, 1057, 1000, 913, 748 cm<sup>-1</sup>; HRMS (APCI): *m/z* [M+1]<sup>+</sup> calcd for C<sub>16</sub>H<sub>15</sub>O<sub>2</sub>: 239.1072; found 239.1079.

**(E)-4-(4-(Methylsulfonyl)phenyl)-2-phenylbut-3-enoic acid (24b):**

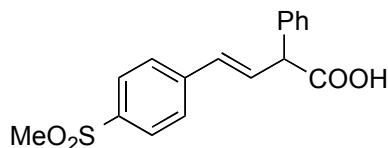

**24b**

Colorless solid; m.p.: 160-162 °C; yield: 38% (59 mg, 0.190 mmol); <sup>1</sup>H NMR (400 MHz, DMSO-d<sub>6</sub>): δ = 3.18 (s, 3H, SO<sub>2</sub>Me), 5.31 (d, *J* = 5.6 Hz, 1H, CH), 6.64 (dd, *J*<sub>1</sub> = 5.6, *J*<sub>2</sub> = 16.0 Hz, 1H, CH), 6.78 (d, *J* = 16.0 Hz, 1H, CH), 7.25 (t, *J* = 8.0 Hz, 1H, ArH), 7.32-7.37 (m, 2H, ArH), 7.42 (d, *J* = 7.6 Hz, 2H, ArH), 7.69 (d, *J* = 7.6 Hz, 2H, ArH), 7.85 (d, *J* = 8.4 Hz, 2H, ArH) ppm; <sup>13</sup>C NMR (100 MHz, CDCl<sub>3</sub>): δ = 47.9, 77.3, 130.7 (2C), 130.8, 131.4 (2C), 131.5, 131.8 (2C), 132.6 (2C), 142.0, 143.5, 146.2, 148.2, 165.3 ppm; IR (KBr): ν = 2961, 2923, 2870, 1739, 1639, 1443, 1133, 968, 770, 701 cm<sup>-1</sup>; HRMS (APCI): *m/z* [M+1]<sup>+</sup> calcd for C<sub>17</sub>H<sub>17</sub>O<sub>4</sub>S: 317.0847; found 317.0844.

**3,4-Diphenylfuran-2(5H)-one (25a):**<sup>[33]</sup>

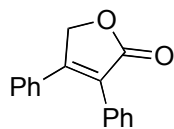

**25a**

Colorless solid; m.p.: 96-98 °C; yield: 87% (41 mg, 0.174 mmol); <sup>1</sup>H NMR (400 MHz, CDCl<sub>3</sub>): δ = 5.18 (s, 2H, CH<sub>2</sub>), 7.31-7.44 (m, 10H, ArH) ppm; <sup>13</sup>C NMR (100 MHz, CDCl<sub>3</sub>): δ = 70.6, 126.2, 127.5 (2C), 128.7 (2C), 128.8, 129.0 (2C), 129.3 (2C), 130.2, 130.6, 130.9, 156.1, 173.5 ppm; HRMS (APCI): m/z [M+1]<sup>+</sup> calcd for C<sub>16</sub>H<sub>13</sub>O<sub>2</sub>: 237.0916; found 237.0921.

**4-(4-(Methylsulfonyl)phenyl)-3-phenylfuran-2(5H)-one (25b):**<sup>[34]</sup>

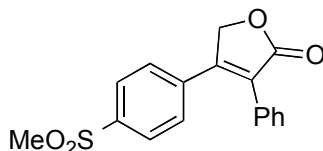

**25b**

Colorless solid; m.p.: 202-204 °C; yield: 83% (26 mg, 0.083 mmol); <sup>1</sup>H NMR (400 MHz, CDCl<sub>3</sub>): δ = 3.18 (s, 3H, SO<sub>2</sub>Me), 5.19 (s, 2H, CH<sub>2</sub>), 7.37-7.41 (m, 5H, ArH), 7.51 (d, *J* = 8.4 Hz, 2H, ArH), 7.91 (d, *J* = 8.4 Hz, 2H, ArH) ppm; <sup>13</sup>C NMR (100 MHz, CDCl<sub>3</sub>): δ = 44.7, 70.8, 128.5 (2C), 128.9 (2C), 129.4 (3C), 129.5, 129.6 (2C), 129.9, 136.7, 142.4, 153.9, 173.0 ppm; HRMS (APCI): m/z [M+1]<sup>+</sup> calcd for C<sub>17</sub>H<sub>15</sub>O<sub>4</sub>S: 315.0682; found 315.0691.

## Calculations:

DFT calculations were performed using the GAUSSIAN03 suit of programs.<sup>[35]</sup> Reactants, transition states (TSs), intermediates, and products were fully optimized with the hybrid density functional B3LYP<sup>[36]</sup> using the Pople-type 6-31+G(d,p) basis set<sup>[37]</sup> for all compounds without iodine and a composite basis set consisting of 6-31+G(d,p) for C, H, Se, O, F and LANL2DZ for I incorporating a relativistic pseudopotential (effective core potential, ECP) that largely accounts for scalar relativistic effects in iodine.<sup>[38]</sup> Solvent effects of acetonitrile were approximated using the SCRF approach employing PCM as implemented in Gaussian03.<sup>[39]</sup> Energies in solution were either obtained as single point calculations on gas phase geometries (SCRF=PCM//B3LYP/6-31+G\*\*). All transition states have been characterized by one imaginary frequency (first-order saddle points) on the Potential Energy Surface (PES).<sup>[40]</sup> To determine Minimum Energy Pathways (MEPs) Intrinsic Reaction Coordinate analyses (IRC) were performed, in order to confirm that a specific TS connects the different local minima.<sup>[41]</sup> In addition, the imaginary frequencies were visually analysed and proven to be the correct eigen vibration by animating it in Gabedit.<sup>[42]</sup> Vibrational frequencies and Zero-Point vibrational Energies (ZPE) were determined within the harmonic oscillator approximation, at the same level of theory as that for geometries. All energies reported in this paper are free energies or enthalpies in kcal mol<sup>-1</sup> at 298 K and 1 atm if not stated otherwise. Frequencies remained unscaled. Gabedit was used to generate XYZ-matrices of Gaussian log-files and to obtain geometric data. Rendered graphics were generated with CYLview v1.0.301 BETA by C. Y. Legault.

The following data are compiled on the following pages:

| <b>Figure / Data</b>                                                                                   |                                                       | <b>Page</b> |
|--------------------------------------------------------------------------------------------------------|-------------------------------------------------------|-------------|
| Figure S1. IRC forward                                                                                 |                                                       | S31         |
| Figure S2. IRC reverse                                                                                 |                                                       | S31         |
| Figure S3. Reaction coordinates ( <i>E</i> )- and ( <i>Z</i> )-isomers<br>triflate counterion          |                                                       | S32         |
| Figure S4. Reaction coordinates ( <i>E</i> )- and ( <i>Z</i> )-isomers<br>trifluoro acetate counterion |                                                       | S33         |
| Figure S5. Reaction coordinate of rearrangement                                                        |                                                       | S34         |
| Figure S6. Comparison of iodine and selenium<br>cyclization intermediates                              |                                                       | S35         |
| Matrices & thermodynamic data of optimized<br>structures with triflates                                | B3LYP/6-31+G**/<br>LANLV2DZ                           | S36         |
| Matrices & thermodynamic data of optimized<br>structures with trifluoro acetic acid                    | B3LYP/6-31+G**                                        |             |
| Matrices & thermodynamic data of optimized<br>structures with trifluoro acetic acid                    | B3LYP/6-31+G**/<br>LANLV2DZ                           |             |
| Thermodynamic data of optimized structures with<br>trifluoro acetic acid                               | SCRF=(PCM,<br>CH <sub>3</sub> CN)//<br>B3LYP/6-31+G** |             |

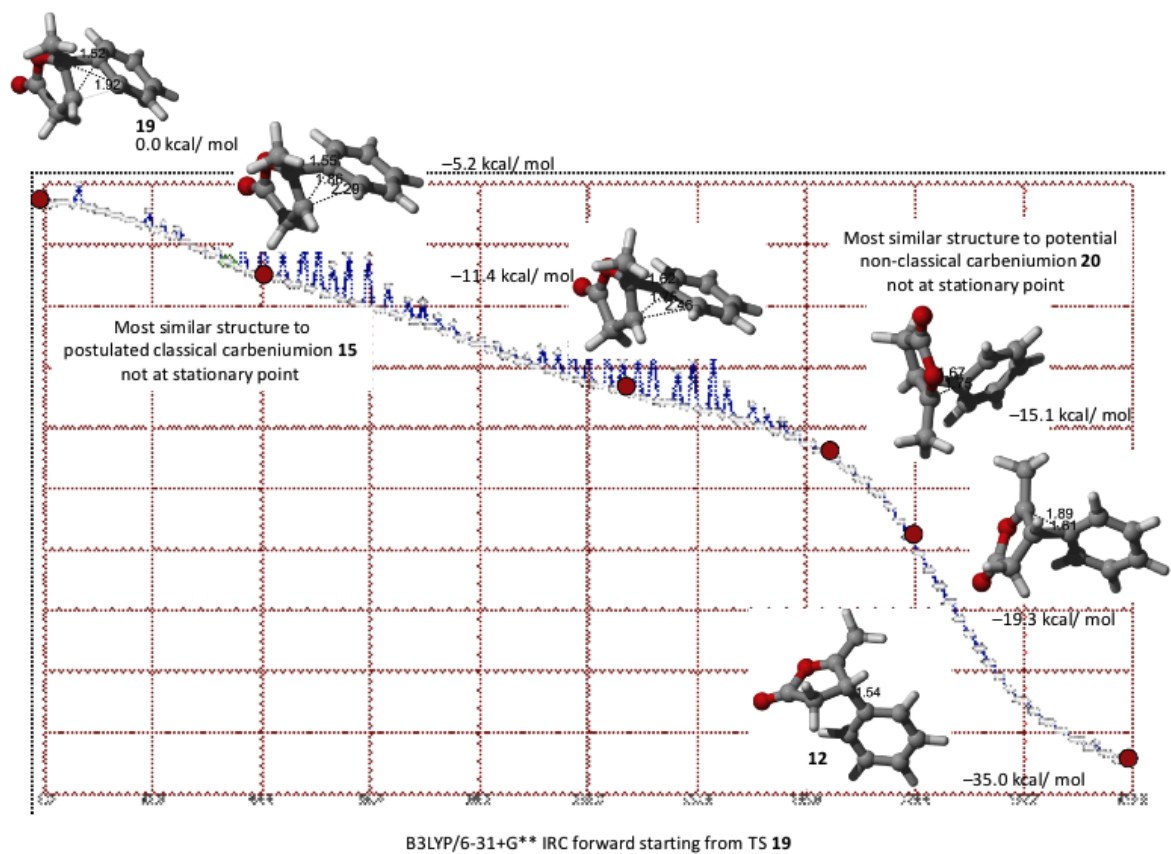

Figure S1: IRC calculation, forward

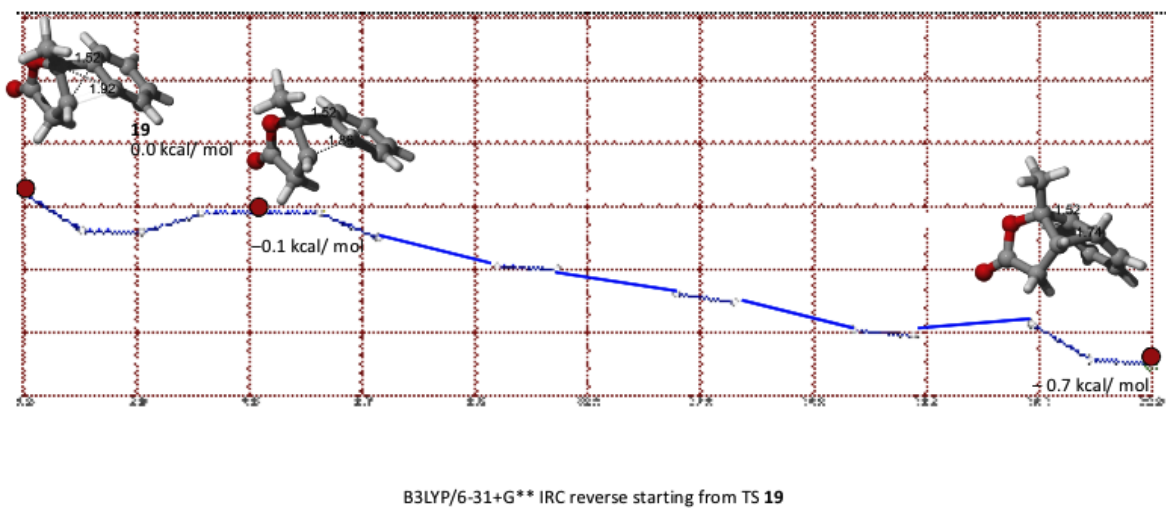

Figure S2: IRC calculation, reverse



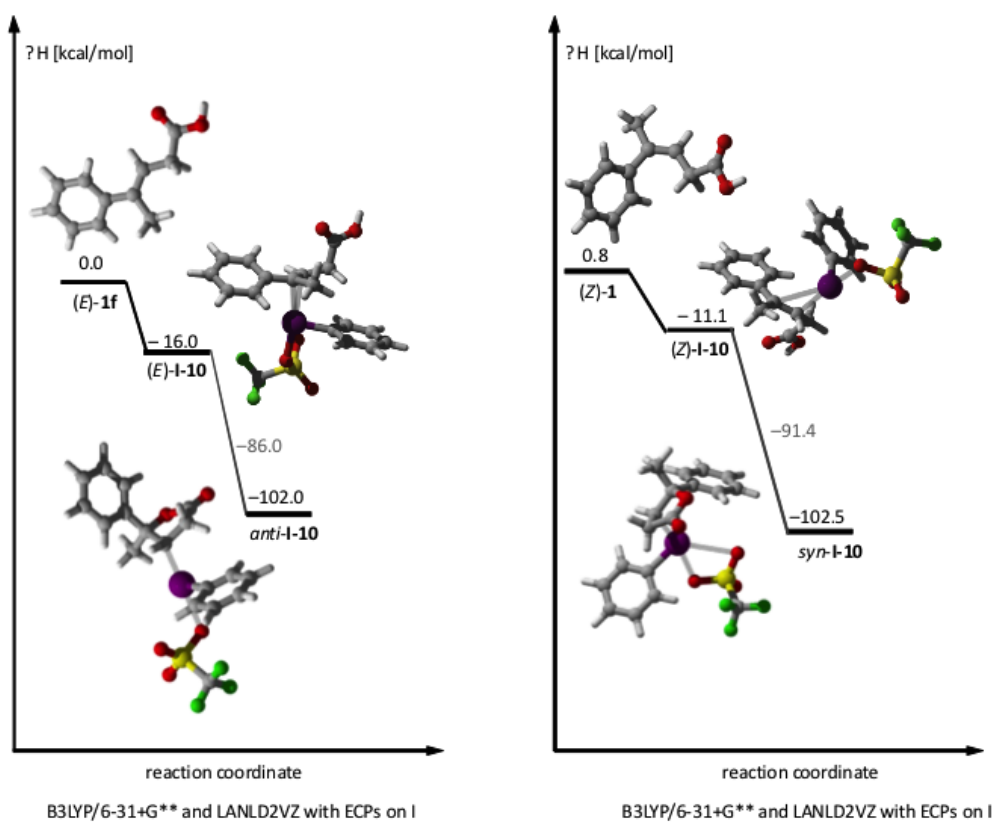

**Figure S3:** Reaction coordinates (*E*)- and (*Z*)-isomers triflate counterion

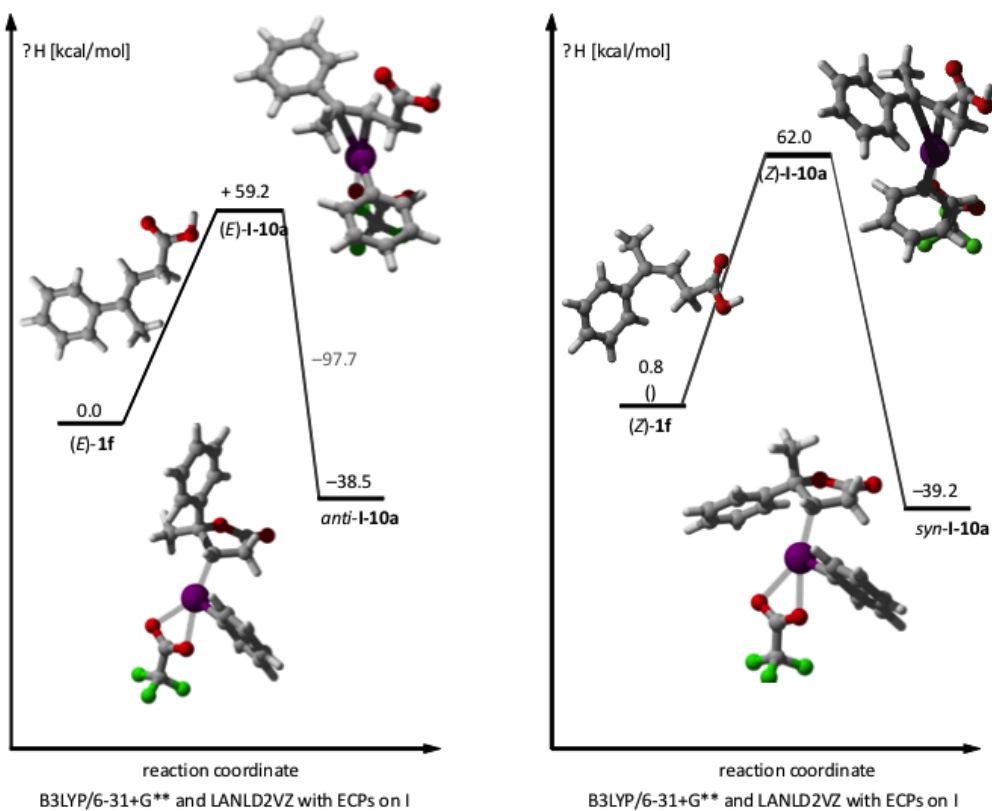

**Figure S4:** Reaction coordinates (*E*)- and (*Z*)-isomers trifluoro acetate counterion

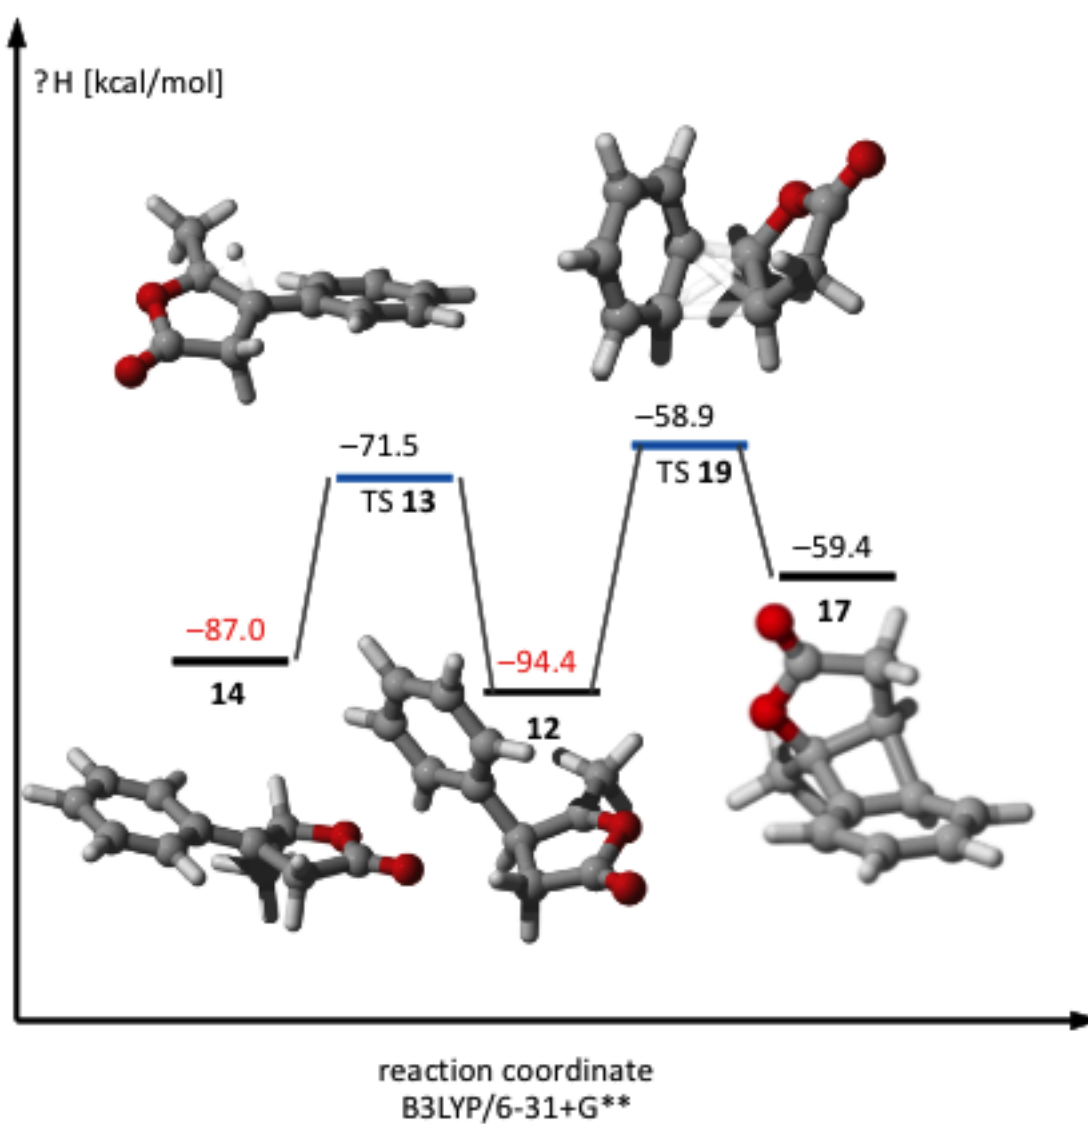

**Figure S5:** Reaction coordinate of rearrangement

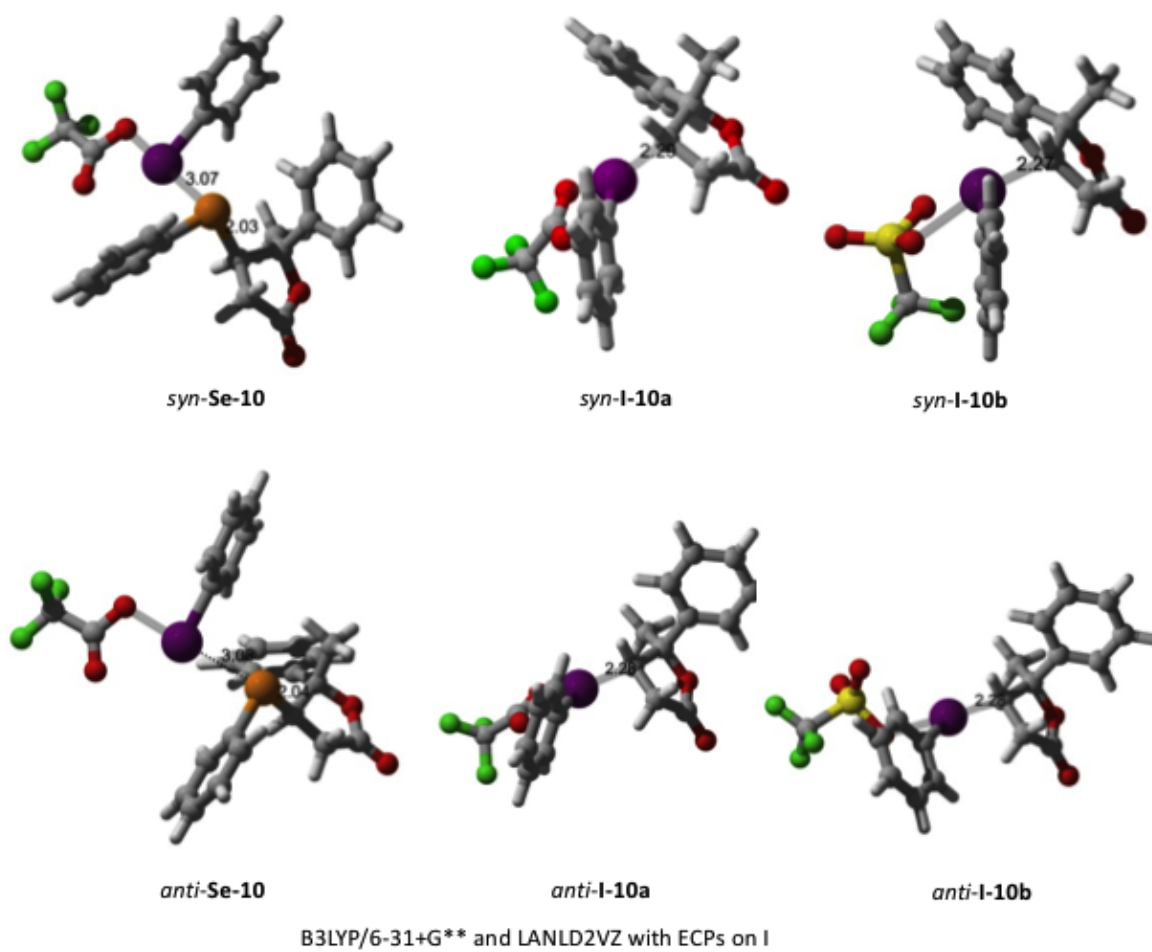

**Figure S6:** Comparison of iodine and selenium cyclization intermediates

B3LYP/6-31+G\*\*/LANL2DVZ (for I)

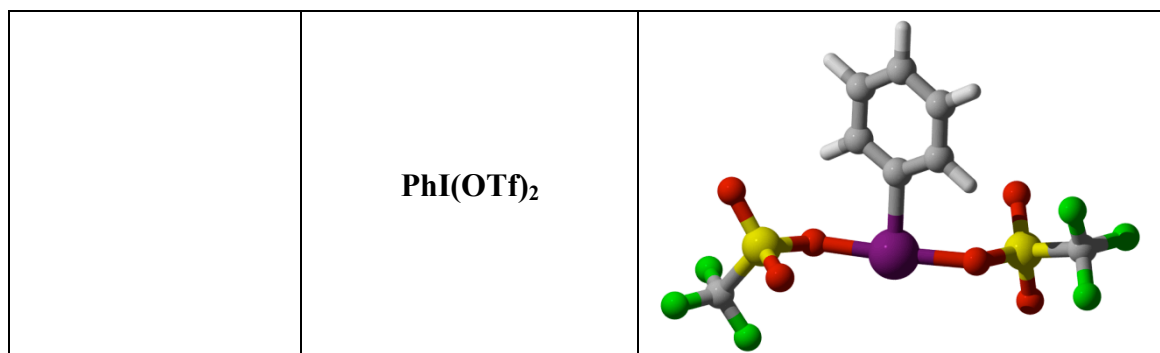

|                                              |              |
|----------------------------------------------|--------------|
| Zero-point correction=                       | 0.139466     |
| (Hartree/Particle)                           |              |
| Thermal correction to Energy=                | 0.165237     |
| Thermal correction to Enthalpy=              | 0.166182     |
| Thermal correction to Gibbs Free Energy=     | 0.075775     |
| Sum of electronic and zero-point Energies=   | -2164.909361 |
| Sum of electronic and thermal Energies=      | -2164.883589 |
| Sum of electronic and thermal Enthalpies=    | -2164.882645 |
| Sum of electronic and thermal Free Energies= | -2164.973051 |

|         | E (Thermal) | CV             | S        |
|---------|-------------|----------------|----------|
|         | KCal/Mol    | Cal/Mol-Kelvin | Cal/Mol- |
| Kelvin  |             |                |          |
| Total   | 103.688     | 87.012         |          |
| 190.276 |             |                |          |

28

XYZ file generated by gabedit : coordinates in Angstrom

|   |               |               |               |
|---|---------------|---------------|---------------|
| F | -5.9617020000 | -2.0090510000 | 0.6647910000  |
| O | -4.2177580000 | 0.7684630000  | 0.1169870000  |
| F | -5.1216670000 | -1.8809060000 | -1.4093050000 |
| C | -4.8309990000 | -2.0878540000 | -0.0960000000 |
| S | -3.5810110000 | -0.6699730000 | 0.5088800000  |
| O | -3.1295860000 | -0.9980820000 | 2.0353240000  |
| F | -4.2179250000 | -3.2929600000 | 0.0836310000  |
| O | -2.2873390000 | -1.0982420000 | -0.6206070000 |
| H | -1.7118030000 | 1.0944460000  | -1.2939770000 |
| I | -0.2215980000 | -1.3908880000 | -0.0160360000 |
| O | 3.0998010000  | -0.7128430000 | -1.8171850000 |
| C | -0.8680560000 | 1.5484690000  | -0.7920980000 |
| C | 0.0611810000  | 0.8002010000  | -0.0839760000 |
| H | -1.3907440000 | 3.5547870000  | -1.3532160000 |
| S | 3.1300330000  | -1.8735000000 | -0.6815880000 |
| O | 1.8746260000  | -1.5946700000 | 0.5336880000  |
| C | -0.6802890000 | 2.9393870000  | -0.8128260000 |
| F | 4.4210860000  | -0.2372860000 | 1.1016840000  |
| C | 1.1524660000  | 1.3264380000  | 0.5929760000  |
| C | 4.6113500000  | -1.4877890000 | 0.5828300000  |
| H | 1.8582960000  | 0.6973780000  | 1.1180570000  |

|   |              |               |               |
|---|--------------|---------------|---------------|
| O | 3.2055270000 | -3.4359400000 | -1.1065480000 |
| F | 4.6044550000 | -2.4265960000 | 1.5667680000  |
| C | 0.4047550000 | 3.5197790000  | -0.1482180000 |
| C | 1.3160440000 | 2.7189030000  | 0.5490630000  |
| F | 5.7826900000 | -1.5323540000 | -0.1169670000 |
| H | 0.5399950000 | 4.5954940000  | -0.1725200000 |
| H | 2.1581610000 | 3.1651870000  | 1.0663970000  |

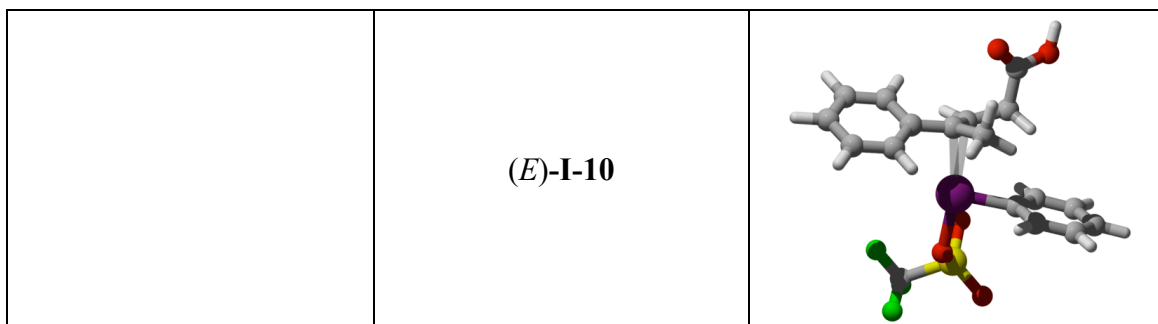

|                                              |              |
|----------------------------------------------|--------------|
| Zero-point correction=                       | 0.323447     |
| (Hartree/Particle)                           |              |
| Thermal correction to Energy=                | 0.353360     |
| Thermal correction to Enthalpy=              | 0.354305     |
| Thermal correction to Gibbs Free Energy=     | 0.254164     |
| Sum of electronic and zero-point Energies=   | -1780.094483 |
| Sum of electronic and thermal Energies=      | -1780.064570 |
| Sum of electronic and thermal Enthalpies=    | -1780.063625 |
| Sum of electronic and thermal Free Energies= | -1780.163766 |

|         | E (Thermal) | CV             | S        |
|---------|-------------|----------------|----------|
|         | KCal/Mol    | Cal/Mol-Kelvin | Cal/Mol- |
| Kelvin  |             |                |          |
| Total   | 221.737     | 105.178        |          |
| 210.763 |             |                |          |

45

XYZ file generated by gabedit : coordinates in Angstrom

|   |               |               |               |
|---|---------------|---------------|---------------|
| F | 4.4044450000  | -2.9809680000 | -1.1774350000 |
| O | 3.9044140000  | 0.0884850000  | -1.8688070000 |
| O | 5.5292900000  | 0.6068940000  | 0.3831520000  |
| F | 5.7594820000  | -2.5963300000 | 0.5712070000  |
| C | 5.3581350000  | -2.1611760000 | -0.6502830000 |
| S | 4.5236200000  | -0.3653460000 | -0.4287180000 |
| H | -2.8588440000 | -4.5995590000 | -1.8969810000 |
| H | -2.4836380000 | -2.1705770000 | -1.9178500000 |
| H | -1.1745370000 | -0.5902610000 | -1.7372100000 |
| H | -0.7695810000 | 1.7978420000  | -2.0117060000 |
| H | 2.2879770000  | 2.0971690000  | -1.5015110000 |
| O | 3.1701250000  | -0.8853370000 | 0.6105620000  |
| C | -2.6789810000 | -4.0764860000 | -0.9647760000 |
| F | 6.4107530000  | -2.0322940000 | -1.5006400000 |
| O | -2.9067640000 | 3.0430650000  | -2.3270470000 |

|   |               |               |               |
|---|---------------|---------------|---------------|
| C | -2.4406010000 | -2.7051450000 | -0.9761720000 |
| H | -3.8149900000 | 3.2872480000  | -2.6128300000 |
| I | 1.1130980000  | -0.4037900000 | -0.0221120000 |
| C | -1.4626360000 | 1.5182370000  | -1.2135450000 |
| C | -1.3431360000 | 0.0502510000  | -0.8736530000 |
| C | -2.8776490000 | 1.8476990000  | -1.6725650000 |
| C | 2.0155060000  | 2.4832420000  | -0.5267520000 |
| H | 2.7414930000  | 4.4661480000  | -0.9231620000 |
| O | -3.8727050000 | 1.1491260000  | -1.4633080000 |
| H | -2.8893630000 | -5.8451070000 | 0.2564220000  |
| C | -2.7072560000 | -4.7760770000 | 0.2506890000  |
| H | -1.2336810000 | 2.1778150000  | -0.3673690000 |
| C | 2.2862390000  | 3.8153220000  | -0.1854860000 |
| C | 1.4451580000  | 1.6698700000  | 0.4559770000  |
| C | -2.2404000000 | -1.9919510000 | 0.2381010000  |
| C | -2.0070610000 | -0.5498180000 | 0.2216940000  |
| C | -2.5124120000 | -4.0921360000 | 1.4596810000  |
| C | -2.2955140000 | -2.7167990000 | 1.4580540000  |
| C | 1.9908530000  | 4.2939370000  | 1.0969460000  |
| C | 1.1532580000  | 2.1086310000  | 1.7508310000  |
| C | -2.4977890000 | 0.2953710000  | 1.3613120000  |
| H | -2.5313120000 | -4.6333790000 | 2.3986380000  |
| H | -1.9166520000 | 1.2112480000  | 1.4925000000  |
| H | -3.5298230000 | 0.5929370000  | 1.1248600000  |
| H | 0.7511320000  | 1.4431180000  | 2.5047530000  |
| H | 2.2111400000  | 5.3246850000  | 1.3504950000  |
| H | -2.1299110000 | -2.2130280000 | 2.4026720000  |
| C | 1.4303530000  | 3.4459780000  | 2.0612970000  |
| H | -2.5337430000 | -0.2415960000 | 2.3099460000  |
| H | 1.2225200000  | 3.8128590000  | 3.0601220000  |

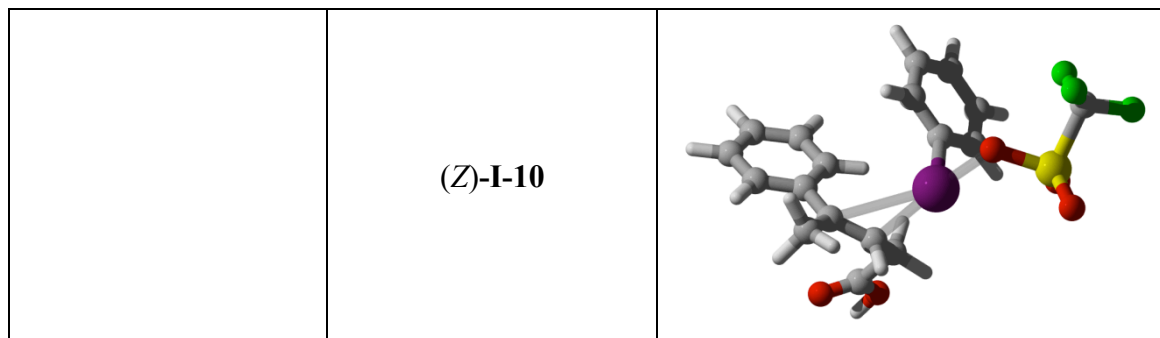

|                                              |              |
|----------------------------------------------|--------------|
| Zero-point correction=                       | 0.323683     |
| (Hartree/Particle)                           |              |
| Thermal correction to Energy=                | 0.353534     |
| Thermal correction to Enthalpy=              | 0.354478     |
| Thermal correction to Gibbs Free Energy=     | 0.254468     |
| Sum of electronic and zero-point Energies=   | -1780.086448 |
| Sum of electronic and thermal Energies=      | -1780.056596 |
| Sum of electronic and thermal Enthalpies=    | -1780.055652 |
| Sum of electronic and thermal Free Energies= | -1780.155662 |

|        | E (Thermal) | CV             | S        |
|--------|-------------|----------------|----------|
|        | KCal/Mol    | Cal/Mol-Kelvin | Cal/Mol- |
| Kelvin |             |                |          |

Total  
210.489

221.846

105.115

45

XYZ file generated by gabedit : coordinates in Angstrom

|   |               |               |               |
|---|---------------|---------------|---------------|
| H | 5.1428450000  | 1.0893320000  | -2.5999950000 |
| H | 4.7955690000  | 2.8511650000  | -0.8759370000 |
| C | 4.3327810000  | 0.9984190000  | -1.8857140000 |
| H | 3.6686540000  | -0.8631610000 | -2.6872190000 |
| C | 4.1384810000  | 1.9891310000  | -0.9121420000 |
| H | 1.5983350000  | -1.6595140000 | -3.2261710000 |
| C | 3.4880960000  | -0.1051590000 | -1.9363780000 |
| H | -0.8017520000 | 1.6076110000  | -1.6748350000 |
| H | -0.7080030000 | 3.8990460000  | -0.7329670000 |
| C | 3.0912920000  | 1.8646670000  | 0.0127980000  |
| C | 1.6245350000  | -2.2790130000 | -2.3264700000 |
| C | 2.4350570000  | -0.2704750000 | -0.9915870000 |
| H | 2.5466770000  | -2.8767640000 | -2.3583020000 |
| H | 2.9294100000  | 2.6369510000  | 0.7560880000  |
| H | 0.7941630000  | -2.9877460000 | -2.3630010000 |
| C | 2.2578210000  | 0.7511310000  | -0.0176950000 |
| C | -1.0348860000 | 1.7764680000  | -0.6310000000 |
| C | -0.9857610000 | 3.0689600000  | -0.0931800000 |
| C | 1.6096360000  | -1.4656920000 | -1.0527240000 |
| F | -5.6525730000 | 1.3595390000  | -0.1962430000 |
| O | -3.7272960000 | -0.7993350000 | -1.1120710000 |
| H | 1.4433250000  | 0.6976940000  | 0.6887160000  |
| F | -6.6125990000 | -0.0248450000 | -1.6811800000 |
| I | -1.6113030000 | -1.2375250000 | -0.6203690000 |
| C | -1.4105550000 | 0.7331120000  | 0.2204570000  |
| C | -6.2600780000 | 0.1551860000  | -0.3832440000 |
| C | -1.3092550000 | 3.2870250000  | 1.2522620000  |
| H | -1.2778960000 | 4.2924520000  | 1.6570040000  |
| C | 0.8027310000  | -1.9903190000 | -0.0058760000 |
| S | -4.9421930000 | -1.2620300000 | 0.1072410000  |
| H | 0.4927500000  | -3.0146010000 | -0.2200030000 |
| O | 3.2820350000  | -2.6345810000 | 1.1252870000  |
| F | -7.3315530000 | 0.0185180000  | 0.4432350000  |
| C | -1.7576010000 | 0.9160220000  | 1.5614150000  |
| H | 0.8510670000  | -0.7594870000 | 1.8401320000  |
| C | -1.6938130000 | 2.2191490000  | 2.0735570000  |
| C | 1.0104590000  | -1.7787810000 | 1.4817720000  |
| O | -5.5685910000 | -2.7210970000 | -0.2021820000 |
| O | -4.3308740000 | -0.9310860000 | 1.5821150000  |
| C | 2.4140070000  | -2.2107790000 | 1.8900860000  |
| H | -2.1197690000 | 0.1002170000  | 2.1736620000  |
| H | -1.9679320000 | 2.3928330000  | 3.1079080000  |
| H | 0.3021060000  | -2.3989840000 | 2.0435920000  |
| O | 2.5818200000  | -2.0682810000 | 3.2368610000  |
| H | 3.4706460000  | -2.3653750000 | 3.5322760000  |



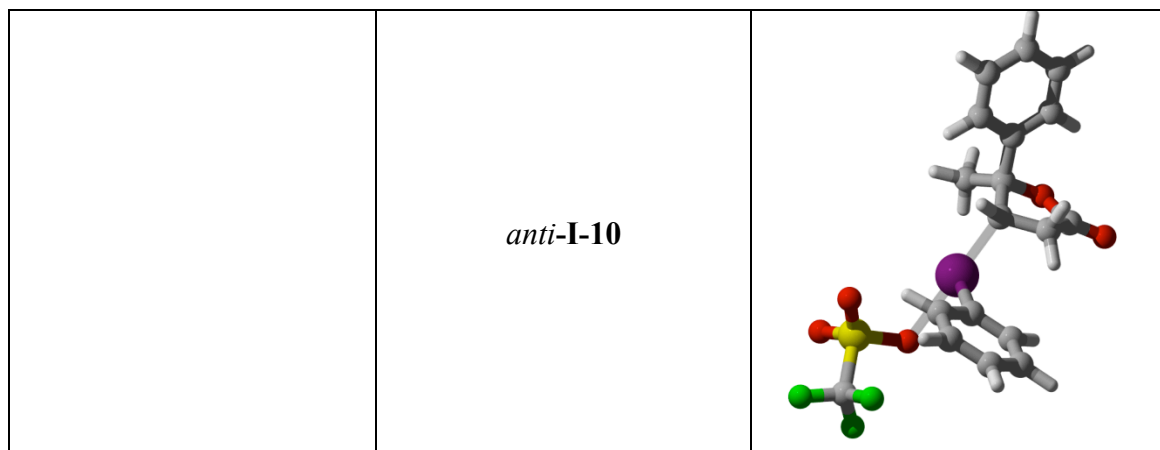

```

Zero-point correction=                0.313696
(Hartree/Particle)
Thermal correction to Energy=          0.341622
Thermal correction to Enthalpy=        0.342566
Thermal correction to Gibbs Free Energy= 0.249562
Sum of electronic and zero-point Energies= -1779.755136
Sum of electronic and thermal Energies=   -1779.727210
Sum of electronic and thermal Enthalpies= -1779.726266
Sum of electronic and thermal Free Energies= -1779.819269

```

|         | E (Thermal)<br>KCal/Mol | CV<br>Cal/Mol-Kelvin | S<br>Cal/Mol- |
|---------|-------------------------|----------------------|---------------|
| Kelvin  |                         |                      |               |
| Total   | 214.371                 | 101.312              |               |
| 195.743 |                         |                      |               |

44

XYZ file generated by gabedit : coordinates in Angstrom

```

H      -6.2956070000    -1.4068930000    2.4382500000
H      -4.0263630000    -2.1233820000    3.1727000000
C      -5.4497840000    -1.3105580000    1.7656570000
C      -4.1737000000    -1.7119380000    2.1795520000
H      -6.6148550000    -0.4856840000    0.1477840000
C      -5.6279630000    -0.7910380000    0.4797580000
C      -3.0840310000    -1.5862640000    1.3134810000
H      -2.1024830000    -1.9117280000    1.6475860000
C      -4.5388330000    -0.6655360000    -0.3914790000
C      -3.2561990000    -1.0555280000    0.0222050000
H      -1.1617930000    -2.9034500000    -0.5147690000
H      -4.6846990000    -0.2804040000    -1.3931350000
H      -2.4269410000    -2.9076580000    -1.7549080000
H      -0.8964520000    -0.0916670000    0.7661380000
C      -1.5764430000    -2.3465920000    -1.3605270000
C      -2.0497070000    -0.9591110000    -0.9239370000
H      1.4856830000     2.5923270000    -1.6930400000
C      -0.9976350000     0.0170340000    -0.3116740000
H      -2.2138190000     1.7863510000    -0.0615720000
H      -0.8304910000    -2.2813230000    -2.1591070000
H      2.4300290000     4.5728950000    -0.5396990000
O      -2.4547580000    -0.2509350000    -2.1731350000
C      -1.4735800000     1.3904010000    -0.7720630000

```

|   |               |               |               |
|---|---------------|---------------|---------------|
| C | 1.8998360000  | 2.4937660000  | -0.6966710000 |
| C | 2.4480480000  | 3.6074630000  | -0.0457710000 |
| C | -2.1716950000 | 1.1156560000  | -2.0948130000 |
| I | 1.1150280000  | -0.4662710000 | -1.0286810000 |
| H | -0.7006030000 | 2.1509660000  | -0.8799590000 |
| C | 1.9420930000  | 1.2639600000  | -0.0366810000 |
| O | -2.4737640000 | 1.8991350000  | -2.9810390000 |
| O | 3.5724600000  | -0.8708410000 | -1.5400070000 |
| C | 3.0309210000  | 3.4675290000  | 1.2189220000  |
| H | 3.4606360000  | 4.3322970000  | 1.7129060000  |
| O | 3.6371980000  | -1.8569560000 | 1.0301100000  |
| O | 4.8125520000  | -3.3269980000 | -1.0470150000 |
| S | 4.3635900000  | -1.8822340000 | -0.4468090000 |
| C | 2.5417540000  | 1.0835760000  | 1.2078640000  |
| C | 3.0856540000  | 2.2129040000  | 1.8364110000  |
| F | 6.8540510000  | -1.5434520000 | 0.6636260000  |
| H | 2.6527560000  | 0.0945860000  | 1.6387670000  |
| C | 6.0228060000  | -0.8581280000 | -0.1846870000 |
| F | 6.6494520000  | -0.6626050000 | -1.3854680000 |
| H | 3.5678170000  | 2.0969630000  | 2.8007680000  |
| F | 5.7098300000  | 0.3593690000  | 0.3741450000  |

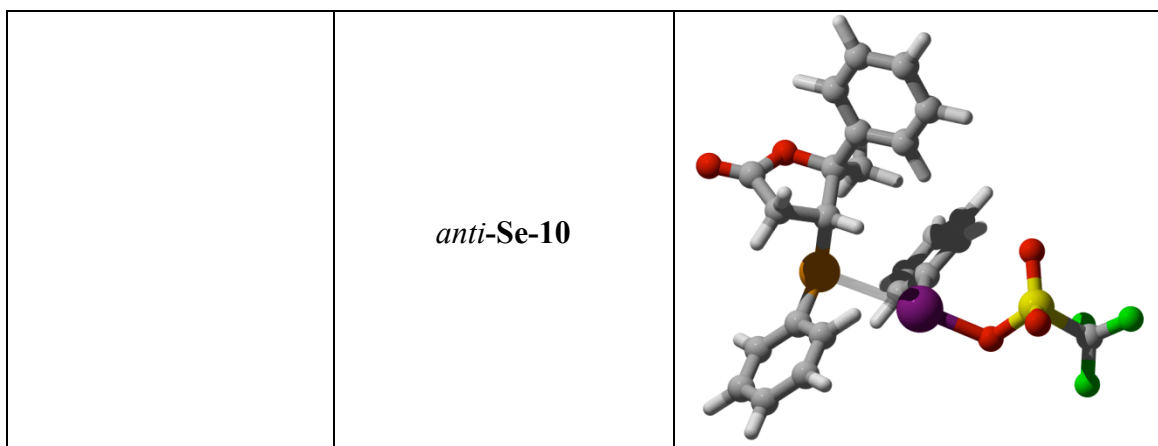

Zero-point correction= 0.406458  
 (Hartree/Particle)  
 Thermal correction to Energy= 0.441297  
 Thermal correction to Enthalpy= 0.442241  
 Thermal correction to Gibbs Free Energy= 0.330607  
 Sum of electronic and zero-point Energies= -4409.912683  
 Sum of electronic and thermal Energies= -4409.877844  
 Sum of electronic and thermal Enthalpies= -4409.876900  
 Sum of electronic and thermal Free Energies= -4409.988534

|         | E (Thermal) | CV             | S        |
|---------|-------------|----------------|----------|
|         | KCal/Mol    | Cal/Mol-Kelvin | Cal/Mol- |
| Kelvin  |             |                |          |
| Total   | 276.918     | 126.141        |          |
| 234.954 |             |                |          |

56

XYZ file generated by gabedit : coordinates in Angstrom

|    |               |               |               |
|----|---------------|---------------|---------------|
| F  | 6.6060830000  | -0.3726350000 | 0.2005340000  |
| O  | 3.8420800000  | -1.6361180000 | -0.8103680000 |
| F  | 6.8686570000  | 1.0230920000  | -1.5405930000 |
| C  | 6.4380440000  | -0.1954000000 | -1.1349520000 |
| F  | 7.0257340000  | -1.1940570000 | -1.8434730000 |
| S  | 4.4677070000  | -0.3001180000 | -1.5013540000 |
| O  | 4.1533790000  | 0.0143070000  | -3.0572780000 |
| H  | -0.3351320000 | -4.1496910000 | -2.8096970000 |
| H  | -2.4155700000 | -5.5150350000 | -2.8869460000 |
| O  | 4.0465340000  | 1.1129810000  | -0.4728500000 |
| C  | -1.1827270000 | -3.8879530000 | -2.1854290000 |
| C  | -2.3523670000 | -4.6568680000 | -2.2268380000 |
| H  | 2.8474040000  | -1.5242700000 | 1.2455690000  |
| H  | -0.7993470000 | 4.0208330000  | -3.7967200000 |
| I  | 1.9395550000  | 1.2627020000  | 0.0856080000  |
| H  | -0.1796720000 | -2.2072400000 | -1.3071260000 |
| C  | -1.1028120000 | -2.7815450000 | -1.3353030000 |
| C  | -3.4346480000 | -4.3171790000 | -1.4090690000 |
| H  | -4.3400850000 | -4.9140460000 | -1.4286990000 |
| H  | -0.4825630000 | 2.0679900000  | -2.3207090000 |
| C  | 2.7104820000  | -0.9109590000 | 2.1289410000  |
| H  | 3.2918090000  | -2.4541010000 | 3.5056950000  |
| C  | 2.3182020000  | 0.4250030000  | 2.0489980000  |
| C  | -1.0837560000 | 4.0878800000  | -2.7524820000 |
| C  | 2.9767830000  | -1.4214050000 | 3.4075350000  |
| C  | -0.8997870000 | 2.9836980000  | -1.9135380000 |
| C  | -2.1929620000 | -2.4295580000 | -0.5181120000 |
| C  | -3.3584090000 | -3.2099620000 | -0.5551480000 |
| C  | 2.1968380000  | 1.2755650000  | 3.1492080000  |
| H  | -1.7709570000 | 6.1271820000  | -2.8979440000 |
| C  | 2.8461950000  | -0.6083730000 | 4.5404180000  |
| H  | -1.2243210000 | -0.0904400000 | -1.2795940000 |
| H  | 1.9166250000  | 2.3165260000  | 3.0465690000  |
| C  | -1.6311510000 | 5.2735830000  | -2.2443330000 |
| C  | 2.4605680000  | 0.7325780000  | 4.4132170000  |
| H  | 3.0541420000  | -1.0166740000 | 5.5229410000  |
| C  | -1.2720540000 | 3.0774230000  | -0.5655480000 |
| H  | -4.1927560000 | -2.9643540000 | 0.0901780000  |
| H  | 2.3737780000  | 1.3652150000  | 5.2893150000  |
| C  | -1.8813050000 | 0.0635170000  | -0.4258350000 |
| Se | -1.0219380000 | 1.5856290000  |               |
|    | 0.6811290000  |               |               |
| C  | -2.0724320000 | -1.2297330000 | 0.4319600000  |
| C  | -2.0002820000 | 5.3571370000  | -0.8969380000 |
| H  | -0.0680600000 | -1.6614150000 | 1.1571880000  |
| C  | -1.8228090000 | 4.2573690000  | -0.0488700000 |
| O  | -3.3751920000 | -0.9785980000 | 1.1005450000  |
| H  | -3.6307870000 | -0.0603230000 | -1.6889480000 |
| C  | -1.0730090000 | -1.4959720000 | 1.5559370000  |
| H  | -2.4305090000 | 6.2711350000  | -0.5033890000 |
| C  | -3.3141880000 | 0.4688550000  | -0.7801370000 |
| H  | -1.3770210000 | -2.4005530000 | 2.0877840000  |
| H  | -2.1181240000 | 4.3194960000  | 0.9926540000  |
| C  | -4.1376960000 | -0.0375470000 | 0.3967460000  |
| H  | -1.0577420000 | -0.6746530000 | 2.2790930000  |
| H  | -3.4814300000 | 1.5333510000  | -0.9481850000 |

O                    -5.2670170000                    0.2737530000                    0.7286550000

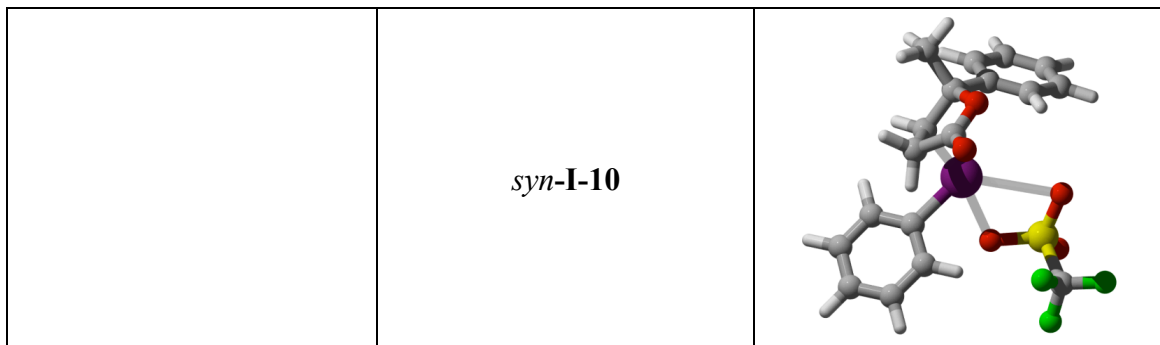

Zero-point correction= 0.313327  
 (Hartree/Particle)  
 Thermal correction to Energy= 0.341455  
 Thermal correction to Enthalpy= 0.342399  
 Thermal correction to Gibbs Free Energy= 0.248698  
 Sum of electronic and zero-point Energies= -1779.755975  
 Sum of electronic and thermal Energies= -1779.727846  
 Sum of electronic and thermal Enthalpies= -1779.726902  
 Sum of electronic and thermal Free Energies= -1779.820603

|         | E (Thermal)<br>KCal/Mol | CV<br>Cal/Mol-Kelvin | S<br>Cal/Mol- |
|---------|-------------------------|----------------------|---------------|
| Kelvin  |                         |                      |               |
| Total   | 214.266                 | 101.515              |               |
| 197.210 |                         |                      |               |

44

XYZ file generated by gabedit : coordinates in Angstrom

```

H      2.2701620000   -3.5316020000   -2.9648200000
H     -0.7764270000    4.8345350000   -2.4147580000
H      2.9911720000   -1.3773770000   -2.0130750000
H      0.1190710000    2.5324390000   -2.2355370000
C      2.0370510000   -3.2987030000   -1.9310230000
C     -1.1835170000    4.1581140000   -1.6707850000
H      4.2726920000   -0.0518950000   -0.7838780000
C      2.4464430000   -2.0783370000   -1.3877700000
C     -0.6689440000    2.8588150000   -1.5664570000
H      1.9761740000    1.2360620000   -0.8825330000
H      0.9865990000   -5.1514710000   -1.5768640000
C      1.3196890000   -4.2123360000   -1.1488890000
H     -2.6246080000    5.5760390000   -0.9226340000
C     -2.2256620000    4.5714200000   -0.8330880000
F     -5.6902320000   -0.7564670000    0.7915890000
C      4.0297740000   -0.0691650000    0.2819820000
C     -1.2102510000    2.0053250000   -0.6042380000
H      4.2865480000    0.9036180000    0.7131620000
C      1.6370210000    0.7882100000    0.0508920000
C      2.1465550000   -1.7583990000   -0.0487130000
I     -0.4419740000   -0.0023870000   -0.4125820000
H      4.6411400000   -0.8338360000    0.7675170000
C      2.5434520000   -0.3981590000    0.5097560000
  
```

|   |               |               |               |
|---|---------------|---------------|---------------|
| O | -2.9414900000 | -0.3570840000 | -0.8282370000 |
| O | -4.4537800000 | -2.6471030000 | -1.3723540000 |
| S | -3.4449780000 | -1.8920910000 | -0.3442480000 |
| O | -2.1885850000 | -2.7375650000 | 0.2942570000  |
| C | -2.7647400000 | 3.6876600000  | 0.1085560000  |
| H | 2.3961650000  | 2.4817900000  | 1.1901930000  |
| C | 1.0217010000  | -3.9031000000 | 0.1809920000  |
| C | -4.5476370000 | -1.3852670000 | 1.2103960000  |
| C | -2.2612010000 | 2.3855490000  | 0.2308640000  |
| F | -4.8719890000 | -2.4948960000 | 1.9441420000  |
| C | 1.5973160000  | 1.7295780000  | 1.2504970000  |
| C | 1.4401360000  | -2.6875570000 | 0.7353840000  |
| H | 0.6619080000  | 2.2770230000  | 1.3843060000  |
| H | -3.5841650000 | 3.9998610000  | 0.7465200000  |
| H | 0.4481500000  | -4.5945180000 | 0.7868800000  |
| H | -2.7041890000 | 1.6841010000  | 0.9256130000  |
| O | 2.3333140000  | -0.4086120000 | 1.9871640000  |
| F | -3.8214060000 | -0.5161930000 | 2.0036680000  |
| H | 1.2208870000  | -2.4557860000 | 1.7694990000  |
| C | 1.8626770000  | 0.8214950000  | 2.4458860000  |
| O | 1.7199750000  | 1.0682730000  | 3.6327550000  |

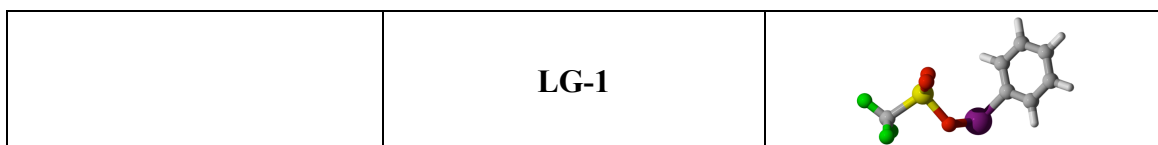

|                                              |              |
|----------------------------------------------|--------------|
| Zero-point correction=                       | 0.114816     |
| (Hartree/Particle)                           |              |
| Thermal correction to Energy=                | 0.130907     |
| Thermal correction to Enthalpy=              | 0.131851     |
| Thermal correction to Gibbs Free Energy=     | 0.066495     |
| Sum of electronic and zero-point Energies=   | -1203.575913 |
| Sum of electronic and thermal Energies=      | -1203.559822 |
| Sum of electronic and thermal Enthalpies=    | -1203.558878 |
| Sum of electronic and thermal Free Energies= | -1203.624234 |

|         | E (Thermal) | CV             | S        |
|---------|-------------|----------------|----------|
|         | KCal/Mol    | Cal/Mol-Kelvin | Cal/Mol- |
| Kelvin  |             |                |          |
| Total   | 82.145      | 54.724         |          |
| 137.554 |             |                |          |

20  
XYZ file generated by gabedit : coordinates in Angstrom

|   |               |               |               |
|---|---------------|---------------|---------------|
| H | 2.6625030000  | 1.8908040000  | -1.7615860000 |
| O | -2.4114910000 | 1.6172170000  | 0.9013980000  |
| H | 0.7509780000  | 0.3142290000  | -1.9123770000 |
| C | 2.5380350000  | 1.1246200000  | -1.0052730000 |
| O | -1.7529110000 | -1.1379440000 | 0.7904850000  |
| C | 1.4653090000  | 0.2356840000  | -1.1016260000 |
| S | -2.6012780000 | 0.3491590000  | -0.0702510000 |
| O | -2.0427820000 | 0.3233090000  | -1.5932600000 |

|   |               |               |               |
|---|---------------|---------------|---------------|
| H | 4.2703700000  | 1.7269930000  | 0.1286560000  |
| C | 3.4421420000  | 1.0302520000  | 0.0649380000  |
| F | -4.7794640000 | -0.5435520000 | 1.3522360000  |
| C | 1.3406650000  | -0.7402880000 | -0.0982280000 |
| C | -4.4837790000 | -0.4375020000 | 0.0416570000  |
| F | -5.3016160000 | 0.4171570000  | -0.6093270000 |
| I | -0.2657260000 | -2.1096890000 | -0.2446330000 |
| C | 3.2844200000  | 0.0494540000  | 1.0571370000  |
| C | 2.2194440000  | -0.8514940000 | 0.9926810000  |
| F | -4.4069150000 | -1.6408570000 | -0.5743700000 |
| H | 3.9841310000  | -0.0122270000 | 1.8824500000  |
| H | 2.0879680000  | -1.6053240000 | 1.7592970000  |

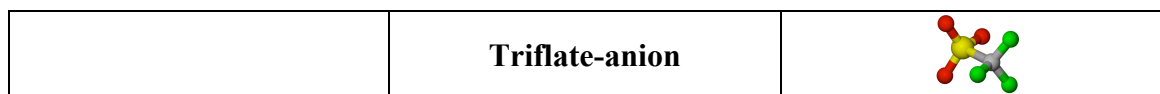

Zero-point correction= 0.026469  
(Hartree/Particle)  
Thermal correction to Energy= 0.033740  
Thermal correction to Enthalpy= 0.034685  
Thermal correction to Gibbs Free Energy= -0.006092  
Sum of electronic and zero-point Energies= -961.526913  
Sum of electronic and thermal Energies= -961.519642  
Sum of electronic and thermal Enthalpies= -961.518697  
Sum of electronic and thermal Free Energies= -961.559474

|        | E (Thermal)<br>KCal/Mol | CV<br>Cal/Mol-Kelvin | S<br>Cal/Mol- |
|--------|-------------------------|----------------------|---------------|
| Kelvin |                         |                      |               |
| Total  | 21.172                  | 24.775               |               |
| 85.822 |                         |                      |               |

8  
XYZ file generated by gabedit : coordinates in Angstrom  
O -1.3340470000 -0.8345460000 -1.1832820000  
S -1.0184880000 -0.0000190000 0.0000490000  
O -1.3339050000 1.4420530000 -0.1313810000  
O -1.3341570000 -0.6073770000 1.3145470000  
F 1.3821760000 0.5356250000 -1.1373800000  
C 0.8740090000 0.0000370000 0.0000890000  
F 1.3821670000 -1.2531480000 0.1047280000  
F 1.3822450000 0.7173760000 1.0326330000

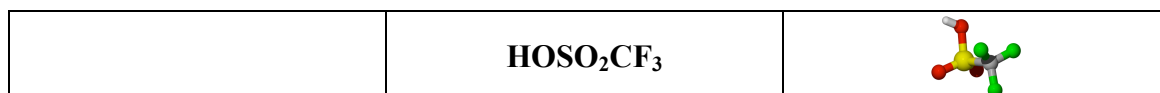

Zero-point correction= 0.038212  
(Hartree/Particle)  
Thermal correction to Energy= 0.046062

|                                              |             |
|----------------------------------------------|-------------|
| Thermal correction to Enthalpy=              | 0.047006    |
| Thermal correction to Gibbs Free Energy=     | 0.005157    |
| Sum of electronic and zero-point Energies=   | -962.001835 |
| Sum of electronic and thermal Energies=      | -961.993985 |
| Sum of electronic and thermal Enthalpies=    | -961.993041 |
| Sum of electronic and thermal Free Energies= | -962.034890 |

|        | E (Thermal)<br>KCal/Mol | CV<br>Cal/Mol-Kelvin | S<br>Cal/Mol- |
|--------|-------------------------|----------------------|---------------|
| Kelvin |                         |                      |               |
| Total  | 28.904                  | 27.025               |               |
| 88.079 |                         |                      |               |

9

XYZ file generated by gabedit : coordinates in Angstrom

|   |               |               |               |
|---|---------------|---------------|---------------|
| O | -1.1857660000 | -0.0423340000 | 1.4838850000  |
| S | -0.7910810000 | -0.3454860000 | 0.1160850000  |
| H | -1.3488890000 | 1.6957440000  | -0.2896730000 |
| O | -1.1871580000 | 0.9101870000  | -0.8432930000 |
| O | -1.1579570000 | -1.5557580000 | -0.5865890000 |
| F | 1.6242680000  | -1.1303100000 | 0.8198020000  |
| C | 1.0866130000  | -0.1940620000 | 0.0371680000  |
| F | 1.4490370000  | 1.0181070000  | 0.4774890000  |
| F | 1.5109370000  | -0.3560920000 | -1.2148700000 |

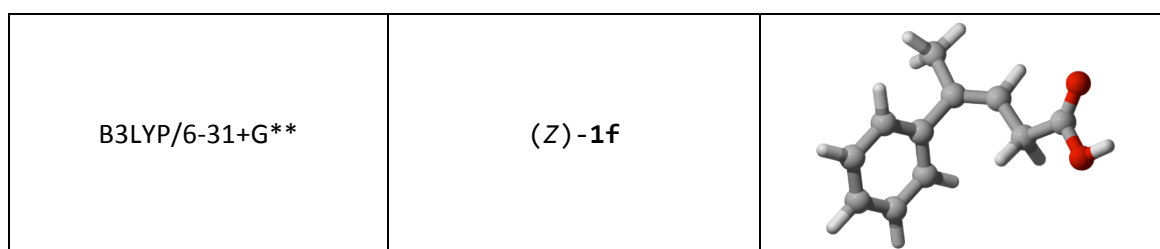

25

XYZ file generated by gabedit : coordinates in Angstrom

|   |               |               |               |
|---|---------------|---------------|---------------|
| C | 0.2023520000  | 1.2400410000  | -0.2130650000 |
| C | 1.4763810000  | 0.8574670000  | -0.4122560000 |
| C | 1.9980020000  | -0.5525580000 | -0.4410040000 |
| C | 3.3399580000  | -0.6997900000 | 0.2492350000  |
| O | 3.6892600000  | -2.0079330000 | 0.3662890000  |
| C | -0.1641920000 | 2.7079000000  | -0.1642910000 |
| C | -0.9259030000 | 0.2757030000  | -0.0374250000 |
| C | -1.7409070000 | 0.3229780000  | 1.1077780000  |
| C | -2.8024950000 | -0.5687890000 | 1.2710560000  |
| C | -3.0820200000 | -1.5193850000 | 0.2847240000  |
| C | -2.2895450000 | -1.5708060000 | -0.8643140000 |
| C | -1.2232840000 | -0.6815800000 | -1.0224310000 |
| O | 4.0554620000  | 0.1969100000  | 0.6413630000  |
| H | 2.2330890000  | 1.6284750000  | -0.5378200000 |
| H | 2.1560180000  | -0.9023710000 | -1.4732070000 |
| H | 1.2991990000  | -1.2665550000 | 0.0047940000  |
| H | 4.5625890000  | -2.0322000000 | 0.7931120000  |
| H | -0.8967470000 | 2.9543380000  | -0.9427870000 |
| H | 0.7163210000  | 3.3415910000  | -0.3015840000 |
| H | -0.6250380000 | 2.9723080000  | 0.7950800000  |
| H | -1.5314860000 | 1.0520020000  | 1.8855090000  |
| H | -3.4111240000 | -0.5216480000 | 2.1697420000  |
| H | -3.9110660000 | -2.2098050000 | 0.4097040000  |
| H | -2.5026160000 | -2.2993510000 | -1.6415940000 |
| H | -0.6222080000 | -0.7169360000 | -1.9266000000 |

|                                              |             |
|----------------------------------------------|-------------|
| Zero-point correction=                       | 0.204470    |
| (Hartree/Particle)                           |             |
| Thermal correction to Energy=                | 0.216928    |
| Thermal correction to Enthalpy=              | 0.217872    |
| Thermal correction to Gibbs Free Energy=     | 0.163386    |
| Sum of electronic and zero-point Energies=   | -576.687386 |
| Sum of electronic and thermal Energies=      | -576.674928 |
| Sum of electronic and thermal Enthalpies=    | -576.673984 |
| Sum of electronic and thermal Free Energies= | -576.728470 |

|         | E (Thermal) | CV             | S        |
|---------|-------------|----------------|----------|
|         | KCal/Mol    | Cal/Mol-Kelvin | Cal/Mol- |
| Kelvin  |             |                |          |
| Total   | 136.124     | 46.310         |          |
| 114.675 |             |                |          |



|                |        |                                                                                     |
|----------------|--------|-------------------------------------------------------------------------------------|
| B3LYP/6-31+G** | (E)-1f | 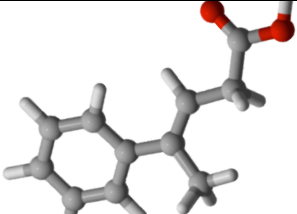 |
|----------------|--------|-------------------------------------------------------------------------------------|

25

XYZ file generated by gabedit : coordinates in Angstrom

```

C      -0.1650010000      0.6360770000      0.0619430000
C      -1.2516640000     -0.0809900000     -0.2858570000
C      -2.6786370000      0.3936320000     -0.2860670000
C      -3.6784040000     -0.7311470000     -0.1029230000
O      -4.9368740000     -0.2449200000      0.0571780000
C      -0.2282640000      2.0886520000      0.4830280000
C       1.1881170000      0.0097500000      0.0170000000
C       1.3737270000     -1.3508730000      0.3288150000
C       2.6381670000     -1.9373530000      0.2748450000
C       3.7554180000     -1.1765740000     -0.0823500000
C       3.5923110000      0.1782260000     -0.3795890000
C       2.3257700000      0.7643060000     -0.3245840000
O      -3.4406810000     -1.9196780000     -0.1102370000
H      -1.1197650000     -1.1033700000     -0.6277030000
H      -2.9413490000      0.8763560000     -1.2408540000
H      -2.8834950000      1.1478430000      0.4805570000
H      -5.5297420000     -1.0104320000      0.1467810000
H       0.1335580000      2.7501000000     -0.3145680000
H       0.4018480000      2.2707500000      1.3601940000
H      -1.2450320000      2.4072440000      0.7221620000
H       0.5216260000     -1.9478520000      0.6387970000
H       2.7525310000     -2.9880950000      0.5263520000
H       4.7407470000     -1.6319630000     -0.1193360000
H       4.4514580000      0.7828960000     -0.6565650000
H       2.2236280000      1.8174120000     -0.5670260000

```

```

Zero-point correction=                0.204479
(Hartree/Particle)
Thermal correction to Energy=          0.217002
Thermal correction to Enthalpy=        0.217946
Thermal correction to Gibbs Free Energy= 0.162983
Sum of electronic and zero-point Energies= -576.687676
Sum of electronic and thermal Energies=   -576.675153
Sum of electronic and thermal Enthalpies= -576.674209
Sum of electronic and thermal Free Energies= -576.729171

```

|         | E (Thermal) | CV             | S        |
|---------|-------------|----------------|----------|
|         | KCal/Mol    | Cal/Mol-Kelvin | Cal/Mol- |
| Kelvin  |             |                |          |
| Total   | 136.171     | 46.363         |          |
| 115.679 |             |                |          |

|                |                     |  |
|----------------|---------------------|--|
| B3LYP/6-31+G** | (PHSe) <sub>2</sub> |  |
|----------------|---------------------|--|

24

XYZ file generated by gabedit : coordinates in Angstrom

|              |               |               |               |
|--------------|---------------|---------------|---------------|
| H            | -0.9312330000 | 0.4716400000  | -1.5612010000 |
| H            | -2.4767510000 | 2.3200110000  | -0.9658620000 |
| C            | -1.7572990000 | 0.2917650000  | -0.8809070000 |
| C            | -2.6293810000 | 1.3305400000  | -0.5442620000 |
| Se           | -0.7933600000 | -2.4262820000 | -             |
| 0.8819250000 |               |               |               |
| C            | -1.9430140000 | -0.9851170000 | -0.3371650000 |
| C            | -3.6978460000 | 1.0944120000  | 0.3246940000  |
| H            | -4.3787160000 | 1.9006150000  | 0.5820900000  |
| C            | -3.0222630000 | -1.2225640000 | 0.5233670000  |
| C            | -3.8932300000 | -0.1840930000 | 0.8572200000  |
| H            | -3.1768550000 | -2.2167020000 | 0.9304080000  |
| H            | -4.7273130000 | -0.3743000000 | 1.5266620000  |
| H            | 4.7272000000  | -0.3742930000 | -1.5267830000 |
| H            | 3.1767430000  | -2.2166750000 | -0.9304440000 |
| C            | 3.8931510000  | -0.1840710000 | -0.8573020000 |
| C            | 3.0221800000  | -1.2225350000 | -0.5234000000 |
| H            | 4.3787070000  | 1.9006170000  | -0.5821550000 |
| C            | 3.6978170000  | 1.0944280000  | -0.3247660000 |
| C            | 1.9429390000  | -0.9850550000 | 0.3371280000  |
| Se           | 0.7934210000  | -2.4263260000 | -             |
| 0.8819060000 |               |               |               |
| C            | 2.6294390000  | 1.3305500000  | 0.5443050000  |
| C            | 1.7573470000  | 0.2917990000  | 0.8809730000  |
| H            | 2.4769000000  | 2.3200010000  | 0.9659850000  |
| H            | 0.9314170000  | 0.4716420000  | 1.5614380000  |

|                                              |              |
|----------------------------------------------|--------------|
| Zero-point correction=                       | 0.182788     |
| (Hartree/Particle)                           |              |
| Thermal correction to Energy=                | 0.195831     |
| Thermal correction to Enthalpy=              | 0.196775     |
| Thermal correction to Gibbs Free Energy=     | 0.139334     |
| Sum of electronic and zero-point Energies=   | -5262.001084 |
| Sum of electronic and thermal Energies=      | -5261.988041 |
| Sum of electronic and thermal Enthalpies=    | -5261.987097 |
| Sum of electronic and thermal Free Energies= | -5262.044538 |

|         | E (Thermal) | CV             | S        |
|---------|-------------|----------------|----------|
| Kelvin  | KCal/Mol    | Cal/Mol-Kelvin | Cal/Mol- |
| Total   | 122.886     | 47.874         |          |
| 120.894 |             |                |          |

|                       |                         |  |
|-----------------------|-------------------------|--|
| <b>B3LYP/6-31+G**</b> | <b>PhSe<sup>-</sup></b> |  |
|-----------------------|-------------------------|--|

12

XYZ file generated by gabedit : coordinates in Angstrom

|   |               |               |               |
|---|---------------|---------------|---------------|
| H | 2.1524830000  | 1.3015590000  | -0.0000230000 |
| H | -2.1524830000 | 1.3015590000  | -0.0000230000 |
| H | 2.1434720000  | -1.1629400000 | -0.0000360000 |
| H | -2.1434720000 | -1.1629400000 | -0.0000360000 |
| C | -1.2008510000 | 0.7704540000  | -0.0000110000 |
| C | 1.2008510000  | 0.7704540000  | -0.0000110000 |

|              |               |               |               |
|--------------|---------------|---------------|---------------|
| Se           | 0.0000000000  | -3.2629860000 |               |
| 0.0000280000 |               |               |               |
| H            | 0.0000000000  | 2.5811640000  | 0.0000320000  |
| C            | -1.1995760000 | -0.6245900000 | -0.0000110000 |
| C            | 1.1995760000  | -0.6245900000 | -0.0000110000 |
| C            | 0.0000000000  | 1.4935710000  | 0.0000250000  |
| C            | 0.0000000000  | -1.3807180000 | 0.0000720000  |

|                                              |              |
|----------------------------------------------|--------------|
| Zero-point correction=                       | 0.089675     |
| (Hartree/Particle)                           |              |
| Thermal correction to Energy=                | 0.095321     |
| Thermal correction to Enthalpy=              | 0.096265     |
| Thermal correction to Gibbs Free Energy=     | 0.058831     |
| Sum of electronic and zero-point Energies=   | -2631.044422 |
| Sum of electronic and thermal Energies=      | -2631.038776 |
| Sum of electronic and thermal Enthalpies=    | -2631.037832 |
| Sum of electronic and thermal Free Energies= | -2631.075266 |

|        | E (Thermal) | CV             | S        |
|--------|-------------|----------------|----------|
|        | KCal/Mol    | Cal/Mol-Kelvin | Cal/Mol- |
| Kelvin |             |                |          |
| Total  | 59.815      | 21.314         |          |
| 78.786 |             |                |          |

|                |                                 |  |
|----------------|---------------------------------|--|
| B3LYP/6-31+G** | <sup>-</sup> OCOCF <sub>3</sub> |  |
|----------------|---------------------------------|--|

7

XYZ file generated by gabedit : coordinates in Angstrom

|   |               |               |               |
|---|---------------|---------------|---------------|
| O | -1.4689130000 | -1.1447960000 | -0.0001070000 |
| C | -0.9952810000 | 0.0101490000  | -0.0001340000 |
| O | -1.5186530000 | 1.1419420000  | -0.0001120000 |
| C | 0.5924880000  | 0.0109590000  | -0.0000680000 |
| F | 1.1669820000  | 1.2469990000  | -0.0034070000 |
| F | 1.1119750000  | -0.6356820000 | -1.0910290000 |
| F | 1.1114030000  | -0.6295740000 | 1.0948570000  |

|                                              |             |
|----------------------------------------------|-------------|
| Zero-point correction=                       | 0.025317    |
| (Hartree/Particle)                           |             |
| Thermal correction to Energy=                | 0.031456    |
| Thermal correction to Enthalpy=              | 0.032400    |
| Thermal correction to Gibbs Free Energy=     | -0.006848   |
| Sum of electronic and zero-point Energies=   | -526.275918 |
| Sum of electronic and thermal Energies=      | -526.269779 |
| Sum of electronic and thermal Enthalpies=    | -526.268835 |
| Sum of electronic and thermal Free Energies= | -526.308083 |

|        | E (Thermal) | CV             | S        |
|--------|-------------|----------------|----------|
|        | KCal/Mol    | Cal/Mol-Kelvin | Cal/Mol- |
| Kelvin |             |                |          |
| Total  | 19.739      | 19.949         |          |
| 82.604 |             |                |          |

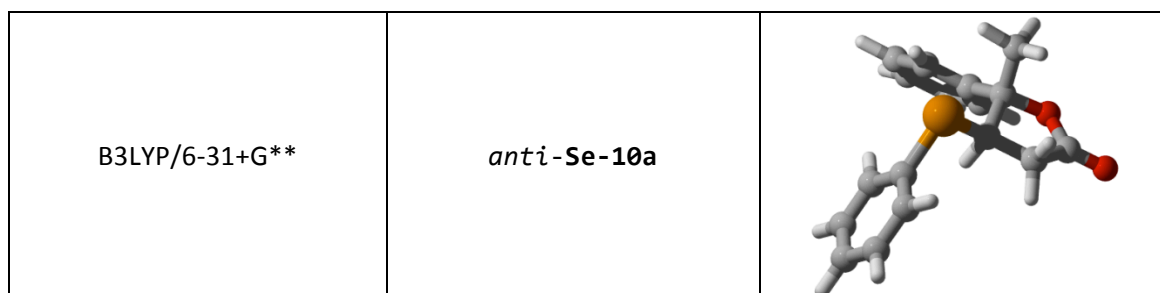

36

XYZ file generated by gabedit : coordinates in Angstrom

|    |               |               |               |
|----|---------------|---------------|---------------|
| H  | -4.4806700000 | -3.3843970000 | -0.6294690000 |
| H  | -2.3350940000 | -3.6359570000 | 0.6124090000  |
| C  | -3.8782230000 | -2.5115940000 | -0.3950630000 |
| C  | -2.6737270000 | -2.6523300000 | 0.2992620000  |
| H  | -5.2272410000 | -1.1169270000 | -1.3367560000 |
| C  | -4.2950670000 | -1.2397620000 | -0.7927190000 |
| C  | -1.9030730000 | -1.5298450000 | 0.6066160000  |
| H  | -0.9716370000 | -1.6545070000 | 1.1501780000  |
| H  | 4.0528530000  | 1.0121410000  | 1.4895200000  |
| C  | -3.5227940000 | -0.1137980000 | -0.4909040000 |
| C  | -2.3129030000 | -0.2491300000 | 0.2032520000  |
| Se | 1.2184130000  | 0.0883780000  |               |
|    | 1.5440250000  |               |               |
| H  | -3.8509270000 | 0.8692360000  | -0.8077720000 |
| H  | 6.0238570000  | 0.4940170000  | 0.0775010000  |
| C  | 3.9590140000  | 0.3163240000  | 0.6617860000  |
| H  | 0.7813420000  | 2.8670520000  | 0.5202760000  |
| C  | 5.0676320000  | 0.0269080000  | -0.1400300000 |
| C  | 2.7232540000  | -0.2796550000 | 0.3877530000  |
| C  | -1.4732790000 | 0.9701340000  | 0.5743100000  |
| C  | 0.0236470000  | 0.8448100000  | 0.1452530000  |
| C  | 0.3979830000  | 2.2534920000  | -0.3035670000 |
| C  | -0.9283810000 | 2.8474720000  | -0.7432300000 |
| O  | -1.9451570000 | 2.1012160000  | -0.2299180000 |
| O  | -1.1279070000 | 3.8281160000  | -1.4153890000 |
| H  | -1.4289830000 | 0.5274910000  | 2.7084070000  |
| C  | 4.9446320000  | -0.8501520000 | -1.2199170000 |
| H  | -1.0439380000 | 2.2184190000  | 2.3147630000  |
| C  | -1.6718250000 | 1.3631800000  | 2.0457060000  |
| H  | 0.0850160000  | 0.1522820000  | -0.6966360000 |
| C  | 2.6033670000  | -1.1704690000 | -0.6857890000 |
| H  | 1.1322040000  | 2.2841480000  | -1.1100450000 |
| H  | 5.8050910000  | -1.0699410000 | -1.8448020000 |
| C  | 3.7090840000  | -1.4460480000 | -1.4922520000 |
| H  | 1.6540750000  | -1.6570650000 | -0.8884470000 |
| H  | -2.7188070000 | 1.6324140000  | 2.2071250000  |
| H  | 3.6081820000  | -2.1356690000 | -2.3254490000 |

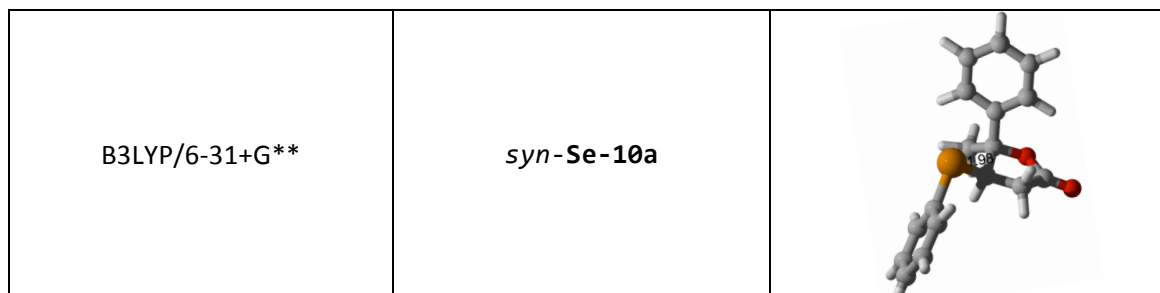

36

XYZ file generated by gabedit : coordinates in Angstrom

|    |               |               |               |
|----|---------------|---------------|---------------|
| H  | 4.7773550000  | -2.9862180000 | -1.1531050000 |
| H  | 3.2090970000  | -3.5342560000 | 0.7020390000  |
| C  | 4.0964440000  | -2.2313840000 | -0.7709340000 |
| C  | 3.2156590000  | -2.5384650000 | 0.2683220000  |
| H  | 4.7939340000  | -0.6812040000 | -2.0995590000 |
| C  | 4.1018420000  | -0.9412580000 | -1.3039280000 |
| C  | 2.3443830000  | -1.5665040000 | 0.7642640000  |
| H  | 1.6726650000  | -1.8310580000 | 1.5730770000  |
| H  | -2.9556720000 | -1.1292380000 | -2.2913770000 |
| C  | 3.2305070000  | 0.0313220000  | -0.8068860000 |
| C  | 2.3233430000  | -0.2715190000 | 0.2188860000  |
| Se | -0.7422360000 | -1.0109950000 | -             |
|    | 0.3018500000  |               |               |
| H  | 3.2830020000  | 1.0364390000  | -1.2089310000 |
| H  | -5.3959060000 | -0.6943260000 | -2.2134180000 |
| C  | -3.4142810000 | -0.7764710000 | -1.3728660000 |
| H  | 0.5392300000  | 1.1786280000  | -1.9907370000 |
| C  | -4.7894660000 | -0.5261320000 | -1.3280930000 |
| C  | -2.6235100000 | -0.5628540000 | -0.2386190000 |
| C  | 1.3676960000  | 0.7905660000  | 0.7766320000  |
| C  | -0.0313100000 | 0.7939880000  | 0.0853790000  |
| C  | 0.1588780000  | 1.7142680000  | -1.1132840000 |
| C  | 1.2416410000  | 2.6686140000  | -0.6362210000 |
| O  | 1.8873330000  | 2.1165310000  | 0.4319960000  |
| O  | 1.5479200000  | 3.7452580000  | -1.0840800000 |
| H  | 0.7190090000  | -0.1375640000 | 2.6287200000  |
| C  | -5.3782210000 | -0.0552560000 | -0.1523680000 |
| H  | 2.2519930000  | 0.7536930000  | 2.7600250000  |
| C  | 1.2603350000  | 0.7539940000  | 2.3011830000  |
| H  | -0.7515230000 | 1.2414560000  | 0.7749520000  |
| C  | -3.2179640000 | -0.0994010000 | 0.9417770000  |
| H  | -0.7413040000 | 2.2541970000  | -1.4107360000 |
| H  | -6.4458960000 | 0.1402750000  | -0.1179040000 |
| C  | -4.5893020000 | 0.1595040000  | 0.9824400000  |
| H  | -2.6174500000 | 0.0422440000  | 1.8356090000  |
| H  | 0.7154530000  | 1.6367060000  | 2.6472650000  |
| H  | -5.0436660000 | 0.5164240000  | 1.9023390000  |

|                                          |          |
|------------------------------------------|----------|
| Zero-point correction=                   | 0.287684 |
| (Hartree/Particle)                       |          |
| Thermal correction to Energy=            | 0.305469 |
| Thermal correction to Enthalpy=          | 0.306413 |
| Thermal correction to Gibbs Free Energy= | 0.239461 |

Sum of electronic and zero-point Energies= -3207.095095  
 Sum of electronic and thermal Energies= -3207.077310  
 Sum of electronic and thermal Enthalpies= -3207.076366  
 Sum of electronic and thermal Free Energies= -3207.143318

|         | E (Thermal)<br>KCal/Mol | CV<br>Cal/Mol-Kelvin | S<br>Cal/Mol- |
|---------|-------------------------|----------------------|---------------|
| Kelvin  |                         |                      |               |
| Total   | 191.685                 | 68.707               |               |
| 140.913 |                         |                      |               |

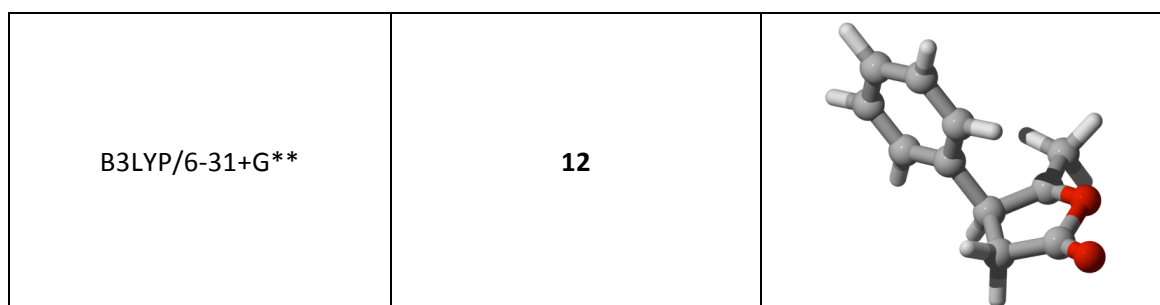

24

XYZ file generated by gabedit : coordinates in Angstrom

|   |               |               |               |
|---|---------------|---------------|---------------|
| H | 4.0996090000  | -1.0839050000 | -0.8779390000 |
| H | 3.8082740000  | 0.5282340000  | 0.9927730000  |
| C | 3.1032640000  | -0.8193920000 | -0.5388530000 |
| C | 2.9404450000  | 0.0907330000  | 0.5098460000  |
| H | 2.1057170000  | -2.0991560000 | -1.9622270000 |
| C | 1.9837070000  | -1.3924180000 | -1.1478830000 |
| C | 1.6601100000  | 0.4342500000  | 0.9481520000  |
| H | 1.5417240000  | 1.1334520000  | 1.7716840000  |
| C | 0.7011150000  | -1.0549070000 | -0.7112100000 |
| C | 0.5357400000  | -0.1466990000 | 0.3467700000  |
| H | -0.1552190000 | -1.5159070000 | -1.1990930000 |
| H | -0.1820660000 | 2.5076050000  | -0.6360470000 |
| H | -0.7622290000 | 0.9434850000  | 1.6654360000  |
| C | -0.8681820000 | 0.2337920000  | 0.8381090000  |
| H | -1.2930050000 | -1.8978090000 | 1.2869460000  |
| C | -1.2025560000 | 2.2223760000  | -0.8919030000 |
| H | -1.3546830000 | 2.2169890000  | -1.9746540000 |
| C | -1.5669850000 | 0.9203470000  | -0.3027580000 |
| C | -1.8046450000 | -0.9366580000 | 1.1926080000  |
| H | -1.8940620000 | 2.9715700000  | -0.4751050000 |
| H | -2.3592510000 | -0.7653020000 | 2.1230330000  |
| O | -2.5555720000 | 0.2761030000  | -0.7785350000 |
| C | -2.8127440000 | -1.0291290000 | 0.0866390000  |
| O | -3.6685080000 | -1.7376460000 | -0.2657990000 |

|                                          |          |
|------------------------------------------|----------|
| Zero-point correction=                   | 0.193478 |
| (Hartree/Particle)                       |          |
| Thermal correction to Energy=            | 0.205148 |
| Thermal correction to Enthalpy=          | 0.206092 |
| Thermal correction to Gibbs Free Energy= | 0.154144 |

Sum of electronic and zero-point Energies= -575.818208  
 Sum of electronic and thermal Energies= -575.806538  
 Sum of electronic and thermal Enthalpies= -575.805594  
 Sum of electronic and thermal Free Energies= -575.857542

|         | E (Thermal) | CV             | S        |
|---------|-------------|----------------|----------|
|         | KCal/Mol    | Cal/Mol-Kelvin | Cal/Mol- |
| Kelvin  |             |                |          |
| Total   | 128.732     | 43.941         |          |
| 109.334 |             |                |          |

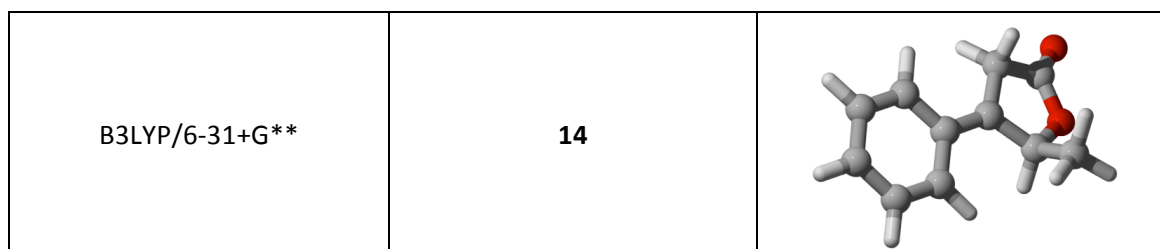

24

XYZ file generated by gabedit : coordinates in Angstrom

|   |               |               |               |
|---|---------------|---------------|---------------|
| O | -4.0399680000 | -1.5117640000 | -0.4702280000 |
| C | -3.0432100000 | -0.8724300000 | -0.3258500000 |
| O | -2.9506770000 | 0.4697300000  | -0.5645200000 |
| H | -1.3961640000 | -2.3235130000 | -0.2900090000 |
| C | -1.6757980000 | -1.3693570000 | 0.1642510000  |
| H | -1.7631050000 | -1.5479350000 | 1.2490690000  |
| C | -1.6223090000 | 0.9742530000  | -0.3509450000 |
| H | -1.3252220000 | 1.5037590000  | -1.2633680000 |
| H | -2.3806110000 | 2.7184990000  | 0.6421430000  |
| C | -1.6316520000 | 1.9499000000  | 0.8459010000  |
| H | -1.9048980000 | 1.4349380000  | 1.7706040000  |
| C | -0.7594490000 | -0.2387050000 | -0.1107240000 |
| H | -0.6562860000 | 2.4246470000  | 0.9742400000  |
| H | 0.7919570000  | -2.3554730000 | 0.4962290000  |
| C | 0.6404280000  | -0.2765490000 | -0.1642860000 |
| C | 1.3448610000  | -1.4736510000 | 0.1914520000  |
| H | 0.8921990000  | 1.7833890000  | -0.8636450000 |
| C | 1.3990720000  | 0.8728490000  | -0.5647800000 |
| C | 2.7253920000  | -1.5076960000 | 0.1653090000  |
| H | 3.2563730000  | -2.4121690000 | 0.4415390000  |
| C | 2.7789120000  | 0.8237230000  | -0.5920390000 |
| C | 3.4416000000  | -0.3623280000 | -0.2264490000 |
| H | 3.3514880000  | 1.6915270000  | -0.9009690000 |
| H | 4.5270570000  | -0.3956430000 | -0.2529360000 |

|                                            |             |
|--------------------------------------------|-------------|
| Zero-point correction=                     | 0.194296    |
| (Hartree/Particle)                         |             |
| Thermal correction to Energy=              | 0.205546    |
| Thermal correction to Enthalpy=            | 0.206491    |
| Thermal correction to Gibbs Free Energy=   | 0.156614    |
| Sum of electronic and zero-point Energies= | -575.806011 |
| Sum of electronic and thermal Energies=    | -575.794761 |
| Sum of electronic and thermal Enthalpies=  | -575.793817 |

Sum of electronic and thermal Free Energies= -575.843693

|         | E (Thermal) | CV             | S        |
|---------|-------------|----------------|----------|
|         | KCal/Mol    | Cal/Mol-Kelvin | Cal/Mol- |
| Kelvin  |             |                |          |
| Total   | 128.982     | 43.363         |          |
| 104.974 |             |                |          |

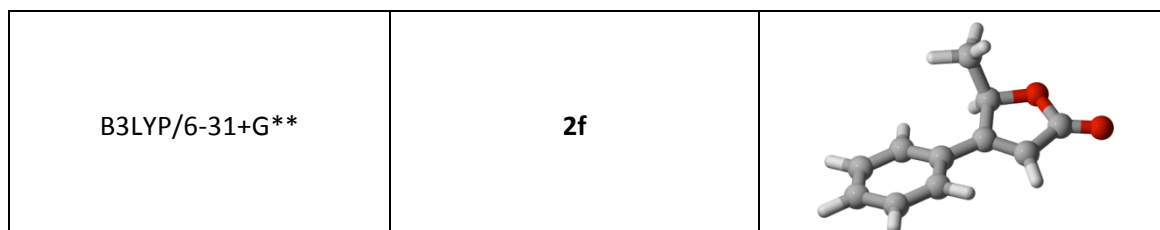

23

XYZ file generated by gabedit : coordinates in Angstrom

|   |               |               |               |
|---|---------------|---------------|---------------|
| C | 1.7493010000  | 0.9165530000  | -0.2613120000 |
| C | 0.9136870000  | -0.3525410000 | -0.2117460000 |
| C | 1.7566060000  | -1.4034560000 | -0.2075430000 |
| C | 3.1481550000  | -0.9239860000 | -0.2772060000 |
| O | 3.1123800000  | 0.4528130000  | -0.3195970000 |
| C | -0.5552670000 | -0.3592450000 | -0.1769410000 |
| O | 4.1833520000  | -1.5477260000 | -0.3051410000 |
| C | -1.2997230000 | 0.7104990000  | -0.7084920000 |
| C | -2.6948520000 | 0.6865030000  | -0.6946110000 |
| C | -3.3731820000 | -0.4027830000 | -0.1427280000 |
| C | -2.6463150000 | -1.4701450000 | 0.3951840000  |
| C | -1.2534280000 | -1.4487890000 | 0.3790020000  |
| C | 1.5867240000  | 1.8431380000  | 0.9430140000  |
| H | 1.5642520000  | 1.4706710000  | -1.1911370000 |
| H | 1.5202500000  | -2.4586850000 | -0.1944440000 |
| H | -0.7896320000 | 1.5584070000  | -1.1550100000 |
| H | -3.2509560000 | 1.5179640000  | -1.1173120000 |
| H | -4.4588280000 | -0.4196370000 | -0.1285310000 |
| H | -3.1660020000 | -2.3167170000 | 0.8339630000  |
| H | -0.6979050000 | -2.2720990000 | 0.8171700000  |
| H | 2.2852770000  | 2.6799180000  | 0.8609950000  |
| H | 1.7978780000  | 1.3008780000  | 1.8693330000  |
| H | 0.5682240000  | 2.2384720000  | 0.9930910000  |

Zero-point correction=  
(Hartree/Particle)

0.183617

Thermal correction to Energy=

0.194330

Thermal correction to Enthalpy=

0.195274

Thermal correction to Gibbs Free Energy=

0.146519

Sum of electronic and zero-point Energies=

-575.499435

Sum of electronic and thermal Energies=

-575.488722

Sum of electronic and thermal Enthalpies=

-575.487778

Sum of electronic and thermal Free Energies=

-575.536532

|         | E (Thermal) | CV             | S        |
|---------|-------------|----------------|----------|
|         | KCal/Mol    | Cal/Mol-Kelvin | Cal/Mol- |
| Kelvin  |             |                |          |
| Total   | 121.944     | 41.633         |          |
| 102.613 |             |                |          |



|                |    |                                                                                     |
|----------------|----|-------------------------------------------------------------------------------------|
| B3LYP/6-31+G** | 4f | 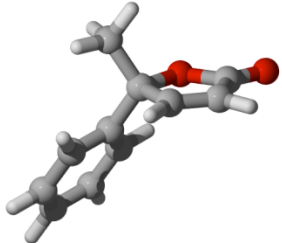 |
|----------------|----|-------------------------------------------------------------------------------------|

23

XYZ file generated by gabedit : coordinates in Angstrom

```

C      -0.9619440000      0.3972900000      0.3161240000
C      -1.5882730000      0.8508640000     -0.9879410000
C      -2.6467580000      0.0901560000     -1.2766390000
C      -2.8060340000     -0.9208010000     -0.2055710000
O      -1.8022300000     -0.7130830000      0.7139700000
O      -3.6293750000     -1.7949720000     -0.0797720000
C       0.4763130000     -0.0880280000      0.1086160000
C      -1.0567040000      1.4646580000      1.4189930000
C       1.4558900000      0.8125430000     -0.3376410000
C       2.7730660000      0.3934970000     -0.5312560000
C       3.1307740000     -0.9340140000     -0.2789130000
C       2.1611910000     -1.8338780000      0.1670110000
C       0.8406800000     -1.4162850000      0.3599320000
H      -1.1897850000      1.6768570000     -1.5656000000
H      -3.3116070000      0.1402300000     -2.1281800000
H      -0.6802540000      1.0530830000      2.3590550000
H      -2.0971990000      1.7724830000      1.5551160000
H      -0.4589000000      2.3429320000      1.1603960000
H       1.1975140000      1.8491560000     -0.5382670000
H       3.5177690000      1.1035780000     -0.8790780000
H       4.1553060000     -1.2616800000     -0.4283690000
H       2.4285850000     -2.8671990000      0.3684650000
H       0.0919700000     -2.1173820000      0.7095540000

```

```

Zero-point correction=                0.182974
(Hartree/Particle)
Thermal correction to Energy=          0.193592
Thermal correction to Enthalpy=        0.194537
Thermal correction to Gibbs Free Energy= 0.146092
Sum of electronic and zero-point Energies= -575.489850
Sum of electronic and thermal Energies=   -575.479231
Sum of electronic and thermal Enthalpies= -575.478287
Sum of electronic and thermal Free Energies= -575.526732

```

|         | E (Thermal) | CV             | S        |
|---------|-------------|----------------|----------|
|         | KCal/Mol    | Cal/Mol-Kelvin | Cal/Mol- |
| Kelvin  |             |                |          |
| Total   | 121.481     | 42.009         |          |
| 101.961 |             |                |          |

|                |       |                                                                                     |
|----------------|-------|-------------------------------------------------------------------------------------|
| B3LYP/6-31+G** | TS 19 | 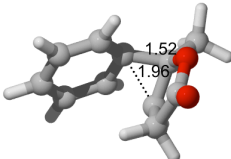 |
|----------------|-------|-------------------------------------------------------------------------------------|

24

XYZ file generated by gabedit : coordinates in Angstrom

|   |               |               |               |
|---|---------------|---------------|---------------|
| H | 3.6516200000  | -1.4437120000 | 0.1824440000  |
| H | 3.0028770000  | 0.5759120000  | 1.4709850000  |
| C | 2.7209030000  | -0.9286950000 | -0.0325430000 |
| C | 2.3530780000  | 0.1769930000  | 0.6986660000  |
| H | 2.2343720000  | -2.2364450000 | -1.6925870000 |
| C | 1.9075350000  | -1.3803360000 | -1.1090710000 |
| C | 1.1309710000  | 0.8595280000  | 0.3866440000  |
| H | 1.0518680000  | 1.8963800000  | 0.6997790000  |
| C | 0.6935590000  | -0.7785170000 | -1.4038060000 |
| C | 0.3098630000  | 0.3734250000  | -0.6975390000 |
| H | 0.0290150000  | -1.1885600000 | -2.1574480000 |
| H | -0.9803830000 | 2.9071580000  | -0.4411610000 |
| H | -0.6425730000 | 1.1686620000  | 1.8091950000  |
| C | -0.6235340000 | 0.4154330000  | 1.0273130000  |
| H | -0.2559210000 | -1.7262650000 | 1.3931780000  |
| C | -1.6822980000 | 2.1150100000  | -0.7158940000 |
| H | -1.8740880000 | 2.1806120000  | -1.7896820000 |
| C | -1.1260880000 | 0.7513120000  | -0.3815910000 |
| C | -1.0606830000 | -0.9875680000 | 1.3202350000  |
| H | -2.6238380000 | 2.2729970000  | -0.1836470000 |
| H | -1.6186000000 | -1.0348640000 | 2.2616310000  |
| O | -2.0203560000 | -0.2879600000 | -0.7569200000 |
| C | -1.9837770000 | -1.3456650000 | 0.1420970000  |
| O | -2.5935230000 | -2.3548270000 | -0.0302800000 |

|                                              |             |
|----------------------------------------------|-------------|
| Zero-point correction=                       | 0.193662    |
| (Hartree/Particle)                           |             |
| Thermal correction to Energy=                | 0.203840    |
| Thermal correction to Enthalpy=              | 0.204784    |
| Thermal correction to Gibbs Free Energy=     | 0.158140    |
| Sum of electronic and zero-point Energies=   | -575.758682 |
| Sum of electronic and thermal Energies=      | -575.748505 |
| Sum of electronic and thermal Enthalpies=    | -575.747561 |
| Sum of electronic and thermal Free Energies= | -575.794204 |

|        | E (Thermal) | CV             | S        |
|--------|-------------|----------------|----------|
|        | KCal/Mol    | Cal/Mol-Kelvin | Cal/Mol- |
| Kelvin |             |                |          |
| Total  | 127.911     | 41.415         |          |
| 98.170 |             |                |          |

NImag = 1,  $\nu(\text{imag}) = -196 \text{ cm}^{-1}$

|                |       |                                                                                     |
|----------------|-------|-------------------------------------------------------------------------------------|
| B3LYP/6-31+G** | TS 13 |  |
|----------------|-------|-------------------------------------------------------------------------------------|

24

XYZ file generated by gabedit : coordinates in Angstrom

|   |               |               |               |
|---|---------------|---------------|---------------|
| H | 0.8322170000  | 1.7072610000  | -0.9004040000 |
| H | 3.2866280000  | 1.6035740000  | -1.0329630000 |
| H | -2.2836800000 | 2.7536710000  | 0.9507080000  |
| H | -1.5402490000 | 2.7642990000  | -0.6551700000 |
| C | 1.3483480000  | 0.8295120000  | -0.5295230000 |
| C | 2.7352190000  | 0.7664600000  | -0.6180430000 |
| C | -1.4902420000 | 2.3139730000  | 0.3425830000  |
| H | -1.4456090000 | -1.8972810000 | -1.1975510000 |
| H | -0.5188050000 | 2.5322880000  | 0.7867360000  |
| O | -3.0278240000 | 0.4863880000  | 0.0125140000  |
| C | -1.7284800000 | 0.8418750000  | 0.2133860000  |
| O | -4.1655890000 | -1.4356750000 | -0.4556890000 |
| C | -3.1228510000 | -0.9096950000 | -0.2629100000 |
| C | -0.8321070000 | -0.2621530000 | 0.0414650000  |
| C | 0.6239330000  | -0.2687380000 | -0.0139080000 |
| C | 3.4152630000  | -0.3769200000 | -0.1830170000 |
| H | 4.4979390000  | -0.4180380000 | -0.2487290000 |
| C | -1.7071160000 | -1.4662300000 | -0.2237640000 |
| C | 1.3198490000  | -1.4262590000 | 0.4025780000  |
| C | 2.7070190000  | -1.4722070000 | 0.3264270000  |
| H | -1.2878590000 | 0.2442450000  | 1.2734520000  |
| H | -1.6322480000 | -2.2729370000 | 0.5122890000  |
| H | 0.7789750000  | -2.2792470000 | 0.8003750000  |
| H | 3.2372580000  | -2.3581670000 | 0.6591600000  |

|                                              |             |
|----------------------------------------------|-------------|
| Zero-point correction=                       | 0.190750    |
| (Hartree/Particle)                           |             |
| Thermal correction to Energy=                | 0.201572    |
| Thermal correction to Enthalpy=              | 0.202516    |
| Thermal correction to Gibbs Free Energy=     | 0.153676    |
| Sum of electronic and zero-point Energies=   | -575.780850 |
| Sum of electronic and thermal Energies=      | -575.770029 |
| Sum of electronic and thermal Enthalpies=    | -575.769084 |
| Sum of electronic and thermal Free Energies= | -575.817924 |

|         | E (Thermal) | CV             | S        |
|---------|-------------|----------------|----------|
|         | KCal/Mol    | Cal/Mol-Kelvin | Cal/Mol- |
| Kelvin  |             |                |          |
| Total   | 126.488     | 42.314         |          |
| 102.791 |             |                |          |

NImag = 1,  $\nu(\text{imag}) = -885\text{cm}^{-1}$

|                |                      |
|----------------|----------------------|
| B3LYP/6-31+G** | CF <sub>3</sub> COOH |
|----------------|----------------------|

8

XYZ file generated by gabedit : coordinates in Angstrom

|   |               |               |               |
|---|---------------|---------------|---------------|
| O | -1.1947590000 | -0.9518150000 | -0.0000360000 |
| C | -0.6097890000 | 0.2522850000  | -0.0000470000 |
| O | -1.1673170000 | 1.3179630000  | -0.0000350000 |
| C | 0.9328350000  | 0.0918270000  | -0.0000200000 |
| F | 1.5275980000  | 1.2882110000  | -0.0005160000 |
| F | 1.3353620000  | -0.5887940000 | -1.0926200000 |
| F | 1.3352690000  | -0.5878350000 | 1.0932320000  |
| H | -2.1591980000 | -0.8218450000 | 0.0000450000  |

Zero-point correction= 0.038708  
 (Hartree/Particle)  
 Thermal correction to Energy= 0.044984  
 Thermal correction to Enthalpy= 0.045929  
 Thermal correction to Gibbs Free Energy= 0.007195  
 Sum of electronic and zero-point Energies= -526.783769  
 Sum of electronic and thermal Energies= -526.777493  
 Sum of electronic and thermal Enthalpies= -526.776549  
 Sum of electronic and thermal Free Energies= -526.815282

|        | E (Thermal) | CV             | S        |
|--------|-------------|----------------|----------|
|        | KCal/Mol    | Cal/Mol-Kelvin | Cal/Mol- |
| Kelvin |             |                |          |
| Total  | 28.228      | 21.059         |          |
| 81.521 |             |                |          |

B3LYP/6-31+G\*\*/LANL2DZ (for I)

|  |                                          |  |
|--|------------------------------------------|--|
|  | <b>PhI(OCCF<sub>3</sub>)<sub>2</sub></b> |  |
|--|------------------------------------------|--|

26

XYZ file generated by gabedit : coordinates in Angstrom

|   |               |               |               |
|---|---------------|---------------|---------------|
| C | -0.1395130000 | 1.1069950000  | -0.1771270000 |
| C | 0.9067670000  | 1.6016210000  | 0.5937750000  |
| C | 0.9234330000  | 2.9839150000  | 0.8343090000  |
| C | -0.0791040000 | 3.8099680000  | 0.3148150000  |
| C | -1.1119860000 | 3.2645510000  | -0.4548930000 |
| C | -1.1556040000 | 1.8866290000  | -0.7164050000 |
| I | -0.2121170000 | -1.0571440000 | -0.5746340000 |
| O | 1.9623770000  | -0.9274630000 | -0.2425530000 |
| C | 2.6013920000  | -2.0946730000 | -0.3029390000 |
| O | 2.0953440000  | -3.1922330000 | -0.5589960000 |
| C | 4.0979340000  | -1.9127750000 | -0.0270810000 |
| F | 4.7291910000  | -3.1269640000 | 0.1027870000  |
| F | 4.3009540000  | -1.1909740000 | 1.1394090000  |
| F | 4.7005600000  | -1.2179940000 | -1.0643460000 |
| O | -2.3630620000 | -0.7339250000 | -0.9171470000 |
| C | -3.4718030000 | -1.3266200000 | -0.4540440000 |
| O | -4.6072670000 | -0.9132120000 | -0.6763950000 |
| C | -3.2481430000 | -2.5842120000 | 0.3972810000  |
| F | -2.3441460000 | -3.4472700000 | -0.2304840000 |
| F | -4.4078260000 | -3.2726750000 | 0.6268120000  |
| F | -2.6875850000 | -2.2446400000 | 1.6270680000  |
| H | 1.6914420000  | 0.9615390000  | 0.9717250000  |
| H | 1.7266670000  | 3.4016590000  | 1.4313870000  |
| H | -0.0551490000 | 4.8766320000  | 0.5095980000  |
| H | -1.8917660000 | 3.8997460000  | -0.8605070000 |
| H | -1.9609860000 | 1.4495110000  | -1.2914190000 |

Zero-point correction= 0.145519 (Hartree/Particle)  
 Thermal correction to Energy= 0.166664  
 Thermal correction to Enthalpy= 0.167608  
 Thermal correction to Gibbs Free Energy= 0.087872  
 Sum of electronic and zero-point Energies= -1294.813756  
 Sum of electronic and thermal Energies= -1294.792611  
 Sum of electronic and thermal Enthalpies= -1294.791667  
 Sum of electronic and thermal Free Energies= -1294.871404

|       | E (Thermal)<br>KCal/Mol | CV<br>Cal/Mol-Kelvin | S<br>Cal/Mol-Kelvin |
|-------|-------------------------|----------------------|---------------------|
| Total | 104.583                 | 71.892               | 167.820             |

|  |                  |  |
|--|------------------|--|
|  | <b>(E)-I-10a</b> |  |
|--|------------------|--|

XYZ file generated by gabedit : coordinates in Angstrom

|   |               |               |               |
|---|---------------|---------------|---------------|
| C | -1.9360970000 | -0.2892930000 | 0.1520150000  |
| C | -1.2331350000 | 0.1867150000  | -0.9835570000 |
| C | -1.0862900000 | 1.6584750000  | -1.3025770000 |
| C | -2.4374800000 | 2.2621710000  | -1.6635410000 |
| O | -2.2790830000 | 3.4600330000  | -2.2935250000 |
| O | -3.5322720000 | 1.7558760000  | -1.4036400000 |
| C | -2.4861150000 | -1.6406740000 | 0.1645560000  |
| C | -2.6255460000 | -2.3700040000 | 1.3758090000  |
| C | -3.1495610000 | -3.6595190000 | 1.3740400000  |
| C | -3.5743510000 | -4.2454320000 | 0.1722660000  |
| C | -3.4674380000 | -3.5350360000 | -1.0326660000 |
| C | -2.9234760000 | -2.2541000000 | -1.0424080000 |
| C | -2.1435470000 | 0.6098470000  | 1.3355140000  |
| I | 1.1296480000  | -0.7406700000 | -0.4190810000 |
| O | 3.1703320000  | -1.5931110000 | -0.0993630000 |
| C | 4.1250030000  | -1.1612400000 | -0.9328920000 |
| O | 4.0115380000  | -0.3011420000 | -1.8099170000 |
| C | 5.4521560000  | -1.8890720000 | -0.6511620000 |
| F | 5.8605790000  | -1.6545240000 | 0.6498180000  |
| F | 6.4340660000  | -1.4490460000 | -1.5036460000 |
| F | 5.2986470000  | -3.2523940000 | -0.8196400000 |
| C | 1.7930240000  | 1.1233570000  | 0.4418220000  |
| C | 2.4237190000  | 2.0463050000  | -0.3955260000 |
| C | 2.8908670000  | 3.2330650000  | 0.1857190000  |
| C | 2.7292020000  | 3.4638140000  | 1.5576530000  |
| C | 2.1070880000  | 2.5076110000  | 2.3706350000  |
| C | 1.6309300000  | 1.3114760000  | 1.8174220000  |
| H | -1.2850510000 | -0.4467040000 | -1.8675410000 |
| H | -0.4064860000 | 1.8149470000  | -2.1448800000 |
| H | -0.6795610000 | 2.2430680000  | -0.4685230000 |
| H | -3.1396050000 | 3.8787540000  | -2.5179230000 |
| H | -2.2871230000 | -1.9451240000 | 2.3131850000  |
| H | -3.2292170000 | -4.2102170000 | 2.3042380000  |
| H | -3.9946890000 | -5.2450890000 | 0.1762810000  |
| H | -3.8237790000 | -3.9760900000 | -1.9564520000 |
| H | -2.9080100000 | -1.6956420000 | -1.9709120000 |
| H | -1.3440680000 | 1.3445670000  | 1.4579840000  |
| H | -2.2746910000 | 0.0655110000  | 2.2710290000  |
| H | -3.0765490000 | 1.1658250000  | 1.1601340000  |
| H | 2.5933730000  | 1.8404460000  | -1.4441570000 |
| H | 3.3927430000  | 3.9635390000  | -0.4385660000 |
| H | 3.1010340000  | 4.3828220000  | 1.9963650000  |
| H | 2.0021580000  | 2.6777870000  | 3.4362310000  |
| H | 1.1771200000  | 0.5581160000  | 2.4493780000  |

Zero-point correction= 0.326626  
 (Hartree/Particle)  
 Thermal correction to Energy= 0.354069  
 Thermal correction to Enthalpy= 0.355013  
 Thermal correction to Gibbs Free Energy= 0.261584  
 Sum of electronic and zero-point Energies= -1345.049962  
 Sum of electronic and thermal Energies= -1345.022519  
 Sum of electronic and thermal Enthalpies= -1345.021575  
 Sum of electronic and thermal Free Energies= -1345.115004

|         | E (Thermal) | CV             | S        |
|---------|-------------|----------------|----------|
|         | KCal/Mol    | Cal/Mol-Kelvin | Cal/Mol- |
| Kelvin  |             |                |          |
| Total   | 222.182     | 97.387         |          |
| 196.638 |             |                |          |

|                  |
|------------------|
| <b>(Z)-I-10a</b> |
|------------------|

44

XYZ file generated by gabedit : coordinates in Angstrom

|   |               |               |               |
|---|---------------|---------------|---------------|
| C | 1.4787790000  | -1.6978850000 | -0.6770610000 |
| C | 0.6988180000  | -1.8452160000 | 0.5057290000  |
| C | 0.9724070000  | -1.1694570000 | 1.8354830000  |
| C | 2.3808370000  | -1.5027020000 | 2.3136150000  |
| O | 2.5986870000  | -0.9803510000 | 3.5548830000  |
| O | 3.2147190000  | -2.1517380000 | 1.6793790000  |
| C | 2.2929240000  | -0.5490100000 | -1.0372780000 |
| C | 3.3318820000  | -0.7088180000 | -1.9981640000 |
| C | 4.1613350000  | 0.3530940000  | -2.3426610000 |
| C | 3.9636910000  | 1.6159180000  | -1.7659370000 |
| C | 2.9293700000  | 1.8068750000  | -0.8374210000 |
| C | 2.1127600000  | 0.7426150000  | -0.4694020000 |
| C | 1.4689680000  | -2.8856550000 | -1.6102710000 |
| I | -1.7070420000 | -1.3037320000 | -0.2711320000 |
| O | -3.8349320000 | -0.9498050000 | -0.8715430000 |
| C | -4.7055730000 | -0.7845950000 | 0.1320130000  |
| O | -4.4526080000 | -0.7634390000 | 1.3393080000  |
| C | -6.1297700000 | -0.5898200000 | -0.4193840000 |
| F | -6.1839410000 | 0.5510270000  | -1.2020880000 |
| F | -7.0314990000 | -0.4568020000 | 0.6073320000  |
| F | -6.5015710000 | -1.6692430000 | -1.1975410000 |
| C | -1.5860440000 | 0.7806670000  | 0.2661600000  |
| C | -1.9144050000 | 1.1406630000  | 1.5754510000  |
| C | -1.9060710000 | 2.5058810000  | 1.8925950000  |
| C | -1.5922320000 | 3.4594530000  | 0.9155770000  |
| C | -1.2871840000 | 3.0627600000  | -0.3927120000 |
| C | -1.2825560000 | 1.7044420000  | -0.7375130000 |
| H | 0.3919850000  | -2.8825270000 | 0.6493320000  |
| H | 0.2718220000  | -1.5416160000 | 2.5917720000  |
| H | 0.8599150000  | -0.0836850000 | 1.8417810000  |

|   |               |               |               |
|---|---------------|---------------|---------------|
| H | 3.4945820000  | -1.1970020000 | 3.8955670000  |
| H | 3.5134550000  | -1.6770490000 | -2.4459190000 |
| H | 4.9612320000  | 0.2011640000  | -3.0579850000 |
| H | 4.6074940000  | 2.4445720000  | -2.0397080000 |
| H | 2.7645280000  | 2.7864550000  | -0.4033330000 |
| H | 1.3057080000  | 0.9280120000  | 0.2237740000  |
| H | 0.6394930000  | -3.5633790000 | -1.3950170000 |
| H | 2.3905580000  | -3.4654670000 | -1.4566410000 |
| H | 1.4268240000  | -2.5986110000 | -2.6635640000 |
| H | -2.2157850000 | 0.4060180000  | 2.3106410000  |
| H | -2.1664100000 | 2.8152120000  | 2.8984380000  |
| H | -1.6021050000 | 4.5133290000  | 1.1699700000  |
| H | -1.0667490000 | 3.8028680000  | -1.1537650000 |
| H | -1.0662890000 | 1.3965630000  | -1.7527450000 |

Zero-point correction= 0.326772 (Hartree/Particle)  
 Thermal correction to Energy= 0.353269  
 Thermal correction to Enthalpy= 0.354214  
 Thermal correction to Gibbs Free Energy= 0.263854  
 Sum of electronic and zero-point Energies= -1345.042135  
 Sum of electronic and thermal Energies= -1345.015638  
 Sum of electronic and thermal Enthalpies= -1345.014694  
 Sum of electronic and thermal Free Energies= -1345.105054

|       | E (Thermal) | CV             | S              |
|-------|-------------|----------------|----------------|
|       | KCal/Mol    | Cal/Mol-Kelvin | Cal/Mol-Kelvin |
| Total | 221.680     | 95.363         | 190.179        |

|                   |
|-------------------|
| <b>anti-I-10a</b> |
|-------------------|

43

XYZ file generated by gabedit : coordinates in Angstrom

|   |               |               |               |
|---|---------------|---------------|---------------|
| C | 1.5560070000  | -1.3561030000 | 0.3471020000  |
| C | 0.7301520000  | -0.0514490000 | 0.1183030000  |
| C | 1.0309830000  | 0.7951130000  | 1.3540960000  |
| C | 1.3499010000  | -0.2242320000 | 2.4374300000  |
| O | 1.5988830000  | -1.4594050000 | 1.8335100000  |
| O | 1.4099100000  | -0.0642170000 | 3.6463490000  |
| C | 2.9832880000  | -1.1610480000 | -0.1865350000 |
| C | 3.1852390000  | -0.9124030000 | -1.5562400000 |
| C | 4.4768380000  | -0.7651210000 | -2.0694230000 |
| C | 5.5855320000  | -0.8663710000 | -1.2201110000 |
| C | 5.3917300000  | -1.1236040000 | 0.1404800000  |
| C | 4.0986510000  | -1.2740050000 | 0.6569310000  |
| C | 0.9572220000  | -2.6748050000 | -0.1498160000 |
| I | -1.5068660000 | -0.4885080000 | -0.0424300000 |
| O | -4.0054360000 | -0.4971830000 | -0.0499560000 |
| C | -4.3666130000 | -1.7472300000 | -0.0933500000 |



|   |               |               |               |
|---|---------------|---------------|---------------|
| O | -3.6183850000 | -2.7508670000 | -0.1779750000 |
| C | -5.8911340000 | -1.9341390000 | -0.0349700000 |
| F | -6.4269830000 | -1.3422170000 | 1.1053820000  |
| F | -6.2596170000 | -3.2648000000 | -0.0211990000 |
| F | -6.5115240000 | -1.3418470000 | -1.1311110000 |
| C | -1.9346400000 | 1.6335640000  | -0.0994310000 |
| C | -1.2422890000 | 2.4462070000  | -0.9972320000 |
| C | -1.5371700000 | 3.8163200000  | -1.0191850000 |
| C | -2.5156990000 | 4.3392730000  | -0.1666510000 |
| C | -3.2108700000 | 3.4956560000  | 0.7069410000  |
| C | -2.9273880000 | 2.1235590000  | 0.7473640000  |
| H | 0.9776430000  | 0.4269250000  | -0.8266930000 |
| H | 0.2293100000  | 1.4631870000  | 1.6740110000  |
| H | 1.9231530000  | 1.4157630000  | 1.1882200000  |
| H | 2.3365920000  | -0.8426340000 | -2.2317180000 |
| H | 4.6168180000  | -0.5748170000 | -3.1286310000 |
| H | 6.5885120000  | -0.7509800000 | -1.6175380000 |
| H | 6.2452410000  | -1.2126430000 | 0.8046510000  |
| H | 3.9536770000  | -1.4914310000 | 1.7078670000  |
| H | 1.6473130000  | -3.4911510000 | 0.0765510000  |
| H | 0.8032190000  | -2.6493790000 | -1.2330970000 |
| H | 0.0090050000  | -2.8998450000 | 0.3488420000  |
| H | -0.5009700000 | 2.0425260000  | -1.6766760000 |
| H | -1.0087860000 | 4.4633840000  | -1.7111750000 |
| H | -2.7437120000 | 5.3993890000  | -0.1915920000 |
| H | -3.9824640000 | 3.8946230000  | 1.3561270000  |
| H | -3.4942690000 | 1.4569540000  | 1.3825910000  |

|                                              |              |
|----------------------------------------------|--------------|
| Zero-point correction=                       | 0.316317     |
| (Hartree/Particle)                           |              |
| Thermal correction to Energy=                | 0.342124     |
| Thermal correction to Enthalpy=              | 0.343068     |
| Thermal correction to Gibbs Free Energy=     | 0.254050     |
| Sum of electronic and zero-point Energies=   | -1344.705937 |
| Sum of electronic and thermal Energies=      | -1344.680130 |
| Sum of electronic and thermal Enthalpies=    | -1344.679186 |
| Sum of electronic and thermal Free Energies= | -1344.768203 |

|         | E (Thermal) | CV             | S        |
|---------|-------------|----------------|----------|
|         | KCal/Mol    | Cal/Mol-Kelvin | Cal/Mol- |
| Kelvin  |             |                |          |
| Total   | 214.686     | 93.934         |          |
| 187.353 |             |                |          |

|                           |
|---------------------------|
| <b>anti-<i>Se-10a</i></b> |
|---------------------------|

55

XYZ file generated by gabedit : coordinates in Angstrom

|   |               |               |               |
|---|---------------|---------------|---------------|
| C | -2.6125530000 | -0.8681530000 | -0.1348370000 |
| C | -2.2912230000 | 0.6579130000  | -0.2586130000 |

|    |               |               |               |
|----|---------------|---------------|---------------|
| C  | -3.6147100000 | 1.3850710000  | 0.0147730000  |
| C  | -4.6781210000 | 0.3542380000  | -0.3534040000 |
| O  | -4.0856140000 | -0.9004830000 | -0.4349330000 |
| O  | -5.8685460000 | 0.5360340000  | -0.5333470000 |
| C  | -1.9430030000 | -1.7575920000 | -1.1747980000 |
| C  | -2.5380760000 | -2.9937650000 | -1.4854880000 |
| C  | -1.9411190000 | -3.8557700000 | -2.4089630000 |
| C  | -0.7386210000 | -3.5013040000 | -3.0337900000 |
| C  | -0.1415790000 | -2.2726420000 | -2.7354090000 |
| C  | -0.7432570000 | -1.4059880000 | -1.8123140000 |
| C  | -2.4663010000 | -1.4299690000 | 1.2869320000  |
| Se | -0.8818910000 | 1.3311560000  | 1.0574850000  |
| I  | 2.0201770000  | 0.5469760000  | 0.3694850000  |
| C  | -0.7025380000 | 3.1684430000  | 0.3869070000  |
| C  | -0.3512050000 | 3.4284520000  | -0.9438680000 |
| C  | -0.2229840000 | 4.7549940000  | -1.3698320000 |
| C  | -0.4393830000 | 5.8062610000  | -0.4693610000 |
| C  | -0.7858630000 | 5.5350010000  | 0.8593560000  |
| C  | -0.9191800000 | 4.2114190000  | 1.2959590000  |
| C  | 1.5975110000  | -2.4122510000 | 1.0592570000  |
| C  | 1.9693590000  | -1.1913700000 | 1.6287190000  |
| C  | 2.3692400000  | -1.0487450000 | 2.9601540000  |
| C  | 2.3888000000  | -2.1981130000 | 3.7590930000  |
| C  | 2.0178760000  | -3.4382820000 | 3.2227870000  |
| C  | 1.6242700000  | -3.5452070000 | 1.8825260000  |
| O  | 4.1544920000  | -0.0033570000 | 0.0226120000  |
| C  | 4.6837480000  | 0.8505100000  | -0.8559700000 |
| O  | 4.0790030000  | 1.7916550000  | -1.3850520000 |
| C  | 6.1601620000  | 0.5299160000  | -1.1435160000 |
| F  | 6.9006010000  | 0.6300210000  | 0.0182670000  |
| F  | 6.6674470000  | 1.4034520000  | -2.0699750000 |
| F  | 6.2796440000  | -0.7571870000 | -1.6314150000 |
| H  | -1.9140900000 | 0.8926090000  | -1.2539260000 |
| H  | -3.7393940000 | 2.2957660000  | -0.5731410000 |
| H  | -3.7522550000 | 1.6486400000  | 1.0707500000  |
| H  | -3.4837710000 | -3.2607050000 | -1.0285530000 |
| H  | -2.4203650000 | -4.7986600000 | -2.6487520000 |
| H  | -0.2805060000 | -4.1689060000 | -3.7553150000 |
| H  | 0.7774940000  | -1.9786970000 | -3.2322390000 |
| H  | 1.3002530000  | -2.4946380000 | 0.0207820000  |
| H  | -2.9239140000 | -2.4208770000 | 1.3261900000  |
| H  | -2.9676480000 | -0.7941090000 | 2.0239430000  |
| H  | -1.4111490000 | -1.5363820000 | 1.5613200000  |
| H  | -0.1785300000 | 2.6212370000  | -1.6483770000 |
| H  | 0.0495950000  | 4.9633930000  | -2.3983400000 |
| H  | -0.3366200000 | 6.8326240000  | -0.8031130000 |
| H  | -0.9562280000 | 6.3474920000  | 1.5567270000  |
| H  | -1.1924880000 | 4.0013590000  | 2.3239950000  |

|                                              |               |               |               |
|----------------------------------------------|---------------|---------------|---------------|
| H                                            | -0.2704090000 | -0.4509710000 | -1.6113840000 |
| H                                            | 2.6671820000  | -0.0913260000 | 3.3690230000  |
| H                                            | 2.7006280000  | -2.1190380000 | 4.7942990000  |
| H                                            | 2.0403320000  | -4.3230000000 | 3.8490070000  |
| H                                            | 1.3453000000  | -4.5071360000 | 1.4676960000  |
| Zero-point correction=                       |               |               | 0.409678      |
| (Hartree/Particle)                           |               |               |               |
| Thermal correction to Energy=                |               |               | 0.443124      |
| Thermal correction to Enthalpy=              |               |               | 0.444068      |
| Thermal correction to Gibbs Free Energy=     |               |               | 0.335121      |
| Sum of electronic and zero-point Energies=   |               |               | -3974.863981  |
| Sum of electronic and thermal Energies=      |               |               | -3974.830535  |
| Sum of electronic and thermal Enthalpies=    |               |               | -3974.829591  |
| Sum of electronic and thermal Free Energies= |               |               | -3974.938538  |

|         | E (Thermal) | CV             | S        |
|---------|-------------|----------------|----------|
|         | KCal/Mol    | Cal/Mol-Kelvin | Cal/Mol- |
| Kelvin  |             |                |          |
| Total   | 278.065     | 120.396        |          |
| 229.298 |             |                |          |

|                         |
|-------------------------|
| <b><i>syn-I-10a</i></b> |
|-------------------------|

43

XYZ file generated by gabedit : coordinates in Angstrom

|   |               |               |               |
|---|---------------|---------------|---------------|
| C | 2.5295390000  | -0.4248680000 | 0.1876320000  |
| C | 1.5568050000  | 0.7421870000  | -0.1711970000 |
| C | 1.8213480000  | 1.8000820000  | 0.8970300000  |
| C | 2.3396790000  | 1.0056700000  | 2.0887810000  |
| O | 2.6771130000  | -0.2792570000 | 1.6662980000  |
| O | 2.4751990000  | 1.3704930000  | 3.2465550000  |
| C | 2.0025290000  | -1.8228730000 | -0.1092520000 |
| C | 1.9026580000  | -2.2589780000 | -1.4450690000 |
| C | 1.3934960000  | -3.5261890000 | -1.7395390000 |
| C | 0.9782240000  | -4.3746020000 | -0.7062890000 |
| C | 1.0811300000  | -3.9507900000 | 0.6214200000  |
| C | 1.5954690000  | -2.6845390000 | 0.9235090000  |
| C | 3.9253410000  | -0.1861420000 | -0.4168170000 |
| I | -0.6011160000 | -0.0046170000 | -0.0544310000 |
| O | -3.0609910000 | -0.2739490000 | 0.2193500000  |
| C | -3.3157190000 | -1.5423890000 | 0.3695730000  |
| O | -2.5003710000 | -2.4936140000 | 0.3323260000  |
| C | -4.8059390000 | -1.8246410000 | 0.6234080000  |
| F | -5.2508860000 | -1.1755050000 | 1.7725630000  |
| F | -5.0676000000 | -3.1716450000 | 0.7850550000  |
| F | -5.5948360000 | -1.3724730000 | -0.4297170000 |
| C | -1.3181590000 | 2.0225080000  | -0.2758550000 |
| C | -0.9086140000 | 2.7744400000  | -1.3778430000 |
| C | -1.3867390000 | 4.0852870000  | -1.5100090000 |

|   |               |               |               |
|---|---------------|---------------|---------------|
| C | -2.2671750000 | 4.6121420000  | -0.5587330000 |
| C | -2.6809180000 | 3.8291560000  | 0.5248550000  |
| C | -2.2098460000 | 2.5178780000  | 0.6749230000  |
| H | 1.6824890000  | 1.0827630000  | -1.1986470000 |
| H | 0.9549560000  | 2.3996660000  | 1.1841680000  |
| H | 2.6002800000  | 2.5066550000  | 0.5772120000  |
| H | 2.2148770000  | -1.6113840000 | -2.2593530000 |
| H | 1.3146430000  | -3.8470580000 | -2.7730070000 |
| H | 0.5694680000  | -5.3524730000 | -0.9359980000 |
| H | 0.7535380000  | -4.5993550000 | 1.4262750000  |
| H | 1.6874660000  | -2.3602320000 | 1.9520080000  |
| H | 4.6248630000  | -0.9153250000 | -0.0001700000 |
| H | 4.2896750000  | 0.8185920000  | -0.1796830000 |
| H | 3.9065210000  | -0.3023100000 | -1.5040550000 |
| H | -0.2484770000 | 2.3624330000  | -2.1324340000 |
| H | -1.0787060000 | 4.6815580000  | -2.3623870000 |
| H | -2.6391120000 | 5.6251590000  | -0.6683540000 |
| H | -3.3779310000 | 4.2274860000  | 1.2539860000  |
| H | -2.5641700000 | 1.8910740000  | 1.4819040000  |

|                                              |              |
|----------------------------------------------|--------------|
| Zero-point correction=                       | 0.316019     |
| (Hartree/Particle)                           |              |
| Thermal correction to Energy=                | 0.341971     |
| Thermal correction to Enthalpy=              | 0.342915     |
| Thermal correction to Gibbs Free Energy=     | 0.253272     |
| Sum of electronic and zero-point Energies=   | -1344.707291 |
| Sum of electronic and thermal Energies=      | -1344.681338 |
| Sum of electronic and thermal Enthalpies=    | -1344.680394 |
| Sum of electronic and thermal Free Energies= | -1344.770037 |

|         | E (Thermal) | CV             | S        |
|---------|-------------|----------------|----------|
|         | KCal/Mol    | Cal/Mol-Kelvin | Cal/Mol- |
| Kelvin  |             |                |          |
| Total   | 214.590     | 94.097         |          |
| 188.670 |             |                |          |

|  |                   |  |
|--|-------------------|--|
|  | <i>syn-Se-10a</i> |  |
|--|-------------------|--|

55

XYZ file generated by gabedit : coordinates in Angstrom

|   |              |               |               |
|---|--------------|---------------|---------------|
| C | 2.1791560000 | -0.1432470000 | 1.6777850000  |
| C | 1.5875230000 | 1.1546400000  | 1.0165700000  |
| C | 2.7830370000 | 2.0993980000  | 0.8714230000  |
| C | 3.6412820000 | 1.7215320000  | 2.0748720000  |
| O | 3.2476010000 | 0.4597400000  | 2.5307700000  |
| O | 4.5399170000 | 2.3554500000  | 2.5960620000  |
| C | 2.8208820000 | -1.1196230000 | 0.6895720000  |
| C | 4.2085000000 | -1.1327320000 | 0.4721780000  |
| C | 4.7748110000 | -2.0246500000 | -0.4462070000 |
| C | 3.9679380000 | -2.9191640000 | -1.1561150000 |
| C | 2.5866210000 | -2.9261030000 | -0.9337650000 |

|    |               |               |               |
|----|---------------|---------------|---------------|
| C  | 2.0186470000  | -2.0378020000 | -0.0150820000 |
| C  | 1.2134000000  | -0.8127820000 | 2.6558650000  |
| Se | 0.6595020000  | 0.8767860000  | -0.7658830000 |
| I  | -2.2479790000 | 0.1504970000  | -0.0972400000 |
| C  | 0.1570370000  | 2.7466750000  | -1.1146570000 |
| C  | -0.5139930000 | 3.5258450000  | -0.1630980000 |
| C  | -0.8591790000 | 4.8447190000  | -0.4785280000 |
| C  | -0.5373690000 | 5.3744520000  | -1.7349780000 |
| C  | 0.1313700000  | 4.5873180000  | -2.6794440000 |
| C  | 0.4823940000  | 3.2669110000  | -2.3735220000 |
| C  | -1.9907030000 | -2.8467330000 | 0.5027510000  |
| C  | -2.0473220000 | -1.9386600000 | -0.5581620000 |
| C  | -2.0458580000 | -2.3233060000 | -1.9009010000 |
| C  | -1.9655660000 | -3.6921000000 | -2.1863340000 |
| C  | -1.9013780000 | -4.6289350000 | -1.1466380000 |
| C  | -1.9170580000 | -4.2099930000 | 0.1902170000  |
| O  | -4.3897510000 | -0.3644070000 | 0.3168100000  |
| C  | -5.0159100000 | 0.7394690000  | 0.7247320000  |
| O  | -4.4872570000 | 1.8528420000  | 0.8469810000  |
| C  | -6.4964800000 | 0.4736510000  | 1.0450350000  |
| F  | -7.1393220000 | -0.0435610000 | -0.0619220000 |
| F  | -7.1217290000 | 1.6346780000  | 1.4193190000  |
| F  | -6.5961270000 | -0.4400970000 | 2.0776340000  |
| H  | 0.8337690000  | 1.5839550000  | 1.6815260000  |
| H  | 2.5223640000  | 3.1578910000  | 0.8960370000  |
| H  | 3.3616260000  | 1.9070120000  | -0.0404680000 |
| H  | 4.8554490000  | -0.4793560000 | 1.0435600000  |
| H  | 5.8492390000  | -2.0258190000 | -0.5943650000 |
| H  | 4.4110030000  | -3.6118460000 | -1.8632250000 |
| H  | 1.9524340000  | -3.6295780000 | -1.4630170000 |
| H  | -2.0242590000 | -2.5226240000 | 1.5356030000  |
| H  | 1.7296630000  | -1.6137920000 | 3.1895380000  |
| H  | 0.3542190000  | -1.2459500000 | 2.1341960000  |
| H  | 0.8548520000  | -0.0847810000 | 3.3891180000  |
| H  | -0.7678180000 | 3.1304040000  | 0.8153980000  |
| H  | -1.3805210000 | 5.4510050000  | 0.2537050000  |
| H  | -0.8080040000 | 6.3963530000  | -1.9753840000 |
| H  | 0.3848960000  | 4.9963220000  | -3.6510020000 |
| H  | 1.0067740000  | 2.6602150000  | -3.1036100000 |
| H  | 0.9490870000  | -2.0877960000 | 0.1642700000  |
| H  | -2.1150340000 | -1.5996270000 | -2.7035670000 |
| H  | -1.9669400000 | -4.0189960000 | -3.2199870000 |
| H  | -1.8484130000 | -5.6867530000 | -1.3780190000 |
| H  | -1.8810150000 | -4.9369670000 | 0.9935710000  |

|                                 |          |
|---------------------------------|----------|
| Zero-point correction=          | 0.409478 |
| (Hartree/Particle)              |          |
| Thermal correction to Energy=   | 0.443050 |
| Thermal correction to Enthalpy= | 0.443994 |

Thermal correction to Gibbs Free Energy= 0.332221  
 Sum of electronic and zero-point Energies= -3974.864227  
 Sum of electronic and thermal Energies= -3974.830654  
 Sum of electronic and thermal Enthalpies= -3974.829710  
 Sum of electronic and thermal Free Energies= -3974.941484

|         | E (Thermal) | CV             | S        |
|---------|-------------|----------------|----------|
|         | KCal/Mol    | Cal/Mol-Kelvin | Cal/Mol- |
| Kelvin  |             |                |          |
| Total   | 278.018     | 120.457        |          |
| 235.248 |             |                |          |

|  | <b>Lg-IIa</b> | <b>PhSeIph(OCOCF<sub>3</sub>)</b> |
|--|---------------|-----------------------------------|
|--|---------------|-----------------------------------|

31

XYZ file generated by gabedit : coordinates in Angstrom

|              |               |               |               |
|--------------|---------------|---------------|---------------|
| Se           | -1.7907120000 | -1.0294510000 | -             |
| 2.2211010000 |               |               |               |
| I            | 0.8818120000  | -0.7605800000 | -1.3405960000 |
| C            | -2.6793230000 | -1.4226470000 | -0.5343570000 |
| C            | -3.2237090000 | -0.3848030000 | 0.2386610000  |
| C            | -3.9046560000 | -0.6796390000 | 1.4237370000  |
| C            | -4.0454950000 | -2.0094340000 | 1.8406290000  |
| C            | -3.5049320000 | -3.0460170000 | 1.0693670000  |
| C            | -2.8219880000 | -2.7550920000 | -0.1156100000 |
| C            | 0.7082510000  | 1.3589400000  | -0.7467280000 |
| C            | -0.3023000000 | 2.1251090000  | -1.3176780000 |
| C            | -0.4036050000 | 3.4706330000  | -0.9349700000 |
| C            | 0.4931760000  | 4.0112380000  | -0.0072360000 |
| C            | 1.4994820000  | 3.2099030000  | 0.5419280000  |
| C            | 1.6224110000  | 1.8607570000  | 0.1755180000  |
| O            | 3.1605180000  | -0.4449920000 | -0.5424760000 |
| C            | 3.7919220000  | -1.5893110000 | -0.6347970000 |
| O            | 3.3579180000  | -2.6628820000 | -1.0965450000 |
| C            | 5.2323370000  | -1.4963460000 | -0.1007110000 |
| F            | 6.0061950000  | -0.6686200000 | -0.9053630000 |
| F            | 5.8459920000  | -2.7299960000 | -0.0553410000 |
| F            | 5.2580610000  | -0.9652340000 | 1.1834940000  |
| H            | -3.1128810000 | 0.6432010000  | -0.0867080000 |
| H            | -4.3233700000 | 0.1255560000  | 2.0185660000  |
| H            | -4.5738970000 | -2.2364840000 | 2.7607880000  |
| H            | -3.6127160000 | -4.0773340000 | 1.3887410000  |
| H            | -2.4017270000 | -3.5540600000 | -0.7157580000 |
| H            | -1.0043710000 | 1.6989650000  | -2.0244590000 |
| H            | -1.1830300000 | 4.0867510000  | -1.3709580000 |
| H            | 0.4100430000  | 5.0530770000  | 0.2834340000  |
| H            | 2.2015320000  | 3.6239870000  | 1.2577940000  |
| H            | 2.4190580000  | 1.2447910000  | 0.5687270000  |

Zero-point correction= 0.211012  
 (Hartree/Particle)  
 Thermal correction to Energy= 0.232297  
 Thermal correction to Enthalpy= 0.233242  
 Thermal correction to Gibbs Free Energy= 0.152160  
 Sum of electronic and zero-point Energies= -3399.235329

Sum of electronic and thermal Energies= -3399.214043  
 Sum of electronic and thermal Enthalpies= -3399.213098  
 Sum of electronic and thermal Free Energies= -3399.294180

|         | E (Thermal)<br>KCal/Mol | CV<br>Cal/Mol-Kelvin | S<br>Cal/Mol- |
|---------|-------------------------|----------------------|---------------|
| Kelvin  |                         |                      |               |
| Total   | 145.769                 | 73.215               |               |
| 170.651 |                         |                      |               |

|              |
|--------------|
| <b>LG-Ia</b> |
|--------------|

19

XYZ file generated by gabedit : coordinates in Angstrom

|   |               |               |               |
|---|---------------|---------------|---------------|
| I | 0.5589340000  | -0.2431720000 | 0.0273950000  |
| O | 3.2498260000  | -0.5799630000 | 0.0613380000  |
| C | 4.1024500000  | 0.3752240000  | -0.0291900000 |
| O | 3.9546410000  | 1.6213680000  | -0.1319840000 |
| C | 5.5642010000  | -0.1561650000 | 0.0085820000  |
| F | 5.8664680000  | -0.7977850000 | 1.2177660000  |
| F | 6.5310360000  | 0.8368030000  | -0.1452230000 |
| F | 5.8212770000  | -1.0963460000 | -0.9974050000 |
| C | -1.6046380000 | -0.1050940000 | 0.0115370000  |
| C | -2.3964800000 | -1.2623330000 | -0.0462320000 |
| C | -3.7945360000 | -1.1697950000 | -0.0570520000 |
| C | -4.4197980000 | 0.0819690000  | -0.0099790000 |
| C | -3.6348590000 | 1.2399700000  | 0.0478970000  |
| C | -2.2369530000 | 1.1471810000  | 0.0584970000  |
| H | -1.9204730000 | -2.2370740000 | -0.0829680000 |
| H | -4.3929700000 | -2.0762850000 | -0.1023790000 |
| H | -5.5038720000 | 0.1541750000  | -0.0184480000 |
| H | -4.1085340000 | 2.2177220000  | 0.0848130000  |
| H | -1.6357160000 | 2.0496060000  | 0.1030370000  |

Zero-point correction= 0.116735  
 (Hartree/Particle)  
 Thermal correction to Energy= 0.130838  
 Thermal correction to Enthalpy= 0.131782  
 Thermal correction to Gibbs Free Energy= 0.068794  
 Sum of electronic and zero-point Energies= -768.978908  
 Sum of electronic and thermal Energies= -768.964805  
 Sum of electronic and thermal Enthalpies= -768.963861  
 Sum of electronic and thermal Free Energies= -769.026848

|         | E (Thermal)<br>KCal/Mol | CV<br>Cal/Mol-Kelvin | S<br>Cal/Mol- |
|---------|-------------------------|----------------------|---------------|
| Kelvin  |                         |                      |               |
| Total   | 82.102                  | 47.125               |               |
| 132.569 |                         |                      |               |

|                                                |        |  |
|------------------------------------------------|--------|--|
| B3LYP/6-31+G**<br>SCRF=PCM(CH <sub>3</sub> CN) | (Z)-1f |  |
|------------------------------------------------|--------|--|

Variational PCM results

=====

<psi(f) | H |psi(f)> (a.u.) = -

576.889235

<psi(f) |H+V(f)/2|psi(f)> (a.u.) = -

576.911642

Total free energy in solution:

with all non electrostatic terms (a.u.) = -

576.894504

-----

--

(Polarized solute)-Solvent (kcal/mol) = -14.06

-----

--

Cavitation energy (kcal/mol) = 23.32

Dispersion energy (kcal/mol) = -13.52

Repulsion energy (kcal/mol) = 0.95

Total non electrostatic (kcal/mol) = 10.75

-----

--

Partition over spheres:

| Sphere         | on Atom | Surface | Charge | GE1   | GCav | GDR   |
|----------------|---------|---------|--------|-------|------|-------|
| 1              | C1      | 0.00    | 0.000  | 0.00  | 0.06 | 0.00  |
| 2              | C2      | 4.77    | -0.010 | -0.15 | 1.30 | -0.45 |
| 3              | C3      | 15.74   | -0.074 | -0.49 | 2.43 | -1.20 |
| 4              | C4      | 2.18    | -0.013 | -0.03 | 0.46 | -0.16 |
| 5              | O5      | 21.85   | -0.089 | -6.15 | 2.58 | -1.69 |
| 6              | C6      | 44.38   | -0.026 | -0.13 | 4.87 | -2.34 |
| 7              | C7      | 0.00    | 0.000  | 0.00  | 0.08 | 0.00  |
| 8              | C8      | 9.63    | -0.010 | -0.35 | 1.71 | -0.78 |
| 9              | C9      | 17.31   | -0.018 | -0.64 | 2.00 | -1.32 |
| 10             | C10     | 17.43   | -0.017 | -0.64 | 2.00 | -1.30 |
| 11             | C11     | 17.32   | -0.018 | -0.65 | 2.00 | -1.32 |
| 12             | C12     | 8.20    | -0.018 | -0.37 | 1.62 | -0.68 |
| 13             | O13     | 17.47   | 0.203  | -3.11 | 2.21 | -1.34 |
| Added spheres: |         | 57.72   | 0.062  | -1.34 | 0.00 | 0.00  |

-----

--

After PCM corrections, the SCF energy is -576.911641700 a.u.

-----

--

|                                                |        |  |
|------------------------------------------------|--------|--|
| B3LYP/6-31+G**<br>SCRF=PCM(CH <sub>3</sub> CN) | (E)-1f |  |
|------------------------------------------------|--------|--|

Variational PCM results

=====

<psi(f) | H |psi(f)> (a.u.) = -

576.889463

<psi(f) |H+V(f)/2|psi(f)> (a.u.) = -

576.911799

Total free energy in solution:

with all non electrostatic terms (a.u.) = -

576.895195



```

-----
--
(Polarized solute)-Solvent                (kcal/mol) =    -14.02
-----
--
Cavitation energy                          (kcal/mol) =     23.22
Dispersion energy                          (kcal/mol) =    -13.74
Repulsion energy                           (kcal/mol) =     0.94
Total non electrostatic                    (kcal/mol) =     10.42
-----

```

```

--
Partition over spheres:
Sphere  on Atom  Surface  Charge  GE1    GCav    GDR
-----
1       C1       0.01   0.000   0.00   0.10   0.00
2       C2       5.51   0.007  -0.11   1.36  -0.50
3       C3      16.48  -0.082  -0.66   2.39  -1.27
4       C4       2.18  -0.013  -0.05   0.46  -0.15
5       O5      21.84  -0.092  -6.23   2.58  -1.67
6       C6      38.77  -0.036  -0.22   4.46  -2.15
7       C7       0.27   0.001  -0.01   0.21  -0.01
8       C8      12.29   0.001  -0.34   1.85  -1.00
9       C9      17.29  -0.016  -0.60   1.99  -1.32
10      C10     17.45  -0.015  -0.63   2.01  -1.29
11      C11     17.30  -0.016  -0.64   1.99  -1.32
12      C12     9.48   0.007  -0.28   1.60  -0.81
13      O13     16.09  0.184  -2.57   2.21  -1.31
Added spheres:    58.90  0.043  -1.68   0.00   0.00
-----

```

```

--
After PCM corrections, the SCF energy is  -576.911799331    a.u.
-----
--

```

|                                                |                     |  |
|------------------------------------------------|---------------------|--|
| B3LYP/6-31+G**<br>SCRF=PCM(CH <sub>3</sub> CN) | (PhSe) <sub>2</sub> |  |
|------------------------------------------------|---------------------|--|

Variational PCM results

=====

<psi(f) | H |psi(f)> (a.u.) = -

5262.182348

<psi(f) | H+V(f)/2 |psi(f)> (a.u.) = -

5262.195444

Total free energy in solution:

with all non electrostatic terms (a.u.) = -

5262.172492

```

-----
--
(Polarized solute)-Solvent                (kcal/mol) =     -8.22
-----

```

```

--
Cavitation energy                          (kcal/mol) =     25.80
Dispersion energy                          (kcal/mol) =    -12.38
Repulsion energy                           (kcal/mol) =     0.98
Total non electrostatic                    (kcal/mol) =     14.40
-----

```

```

--
Partition over spheres:

```

| Sphere         | on Atom | Surface | Charge | GE1   | GCav | GDR   |
|----------------|---------|---------|--------|-------|------|-------|
| 1              | C3      | 10.06   | -0.022 | -0.41 | 1.86 | -0.63 |
| 2              | C4      | 16.45   | -0.031 | -0.71 | 2.00 | -1.15 |
| 3              | Se5     | 21.72   | 0.045  | -0.64 | 2.73 | -0.49 |
| 4              | C6      | 0.67    | 0.002  | -0.01 | 0.24 | -0.01 |
| 5              | C7      | 17.24   | -0.028 | -0.73 | 2.00 | -1.26 |
| 6              | C9      | 13.90   | -0.025 | -0.49 | 2.07 | -0.91 |
| 7              | C10     | 17.16   | -0.027 | -0.70 | 2.00 | -1.25 |
| 8              | C15     | 17.16   | -0.027 | -0.70 | 2.00 | -1.25 |
| 9              | C16     | 14.01   | -0.025 | -0.49 | 2.07 | -0.91 |
| 10             | C18     | 17.24   | -0.028 | -0.73 | 2.00 | -1.26 |
| 11             | C19     | 0.71    | 0.002  | -0.01 | 0.24 | -0.01 |
| 12             | Se20    | 21.82   | 0.045  | -0.65 | 2.73 | -0.49 |
| 13             | C21     | 16.67   | -0.031 | -0.71 | 2.00 | -1.15 |
| 14             | C22     | 10.11   | -0.021 | -0.40 | 1.87 | -0.63 |
| Added spheres: |         | 55.33   | 0.128  | -0.87 | 0.00 | 0.00  |

After PCM corrections, the SCF energy is -5262.19544421 a.u.

|                                                |                   |  |
|------------------------------------------------|-------------------|--|
| B3LYP/6-31+G**<br>SCRF=PCM(CH <sub>3</sub> CN) | PhSe <sup>-</sup> |  |
|------------------------------------------------|-------------------|--|

Variational PCM results

```

=====
<psi(f)| H |psi(f)> (a.u.) = -
2631.124435
<psi(f)|H+V(f)/2|psi(f)> (a.u.) = -
2631.224236
Total free energy in solution:
with all non electrostatic terms (a.u.) = -
2631.212073

```

(Polarized solute)-Solvent (kcal/mol) = -62.63

Cavitation energy (kcal/mol) = 14.39  
Dispersion energy (kcal/mol) = -7.34  
Repulsion energy (kcal/mol) = 0.58  
Total non electrostatic (kcal/mol) = 7.63

Partition over spheres:

| Sphere         | on Atom | Surface | Charge | GE1    | GCav | GDR   |
|----------------|---------|---------|--------|--------|------|-------|
| 1              | C5      | 17.22   | 0.007  | -0.99  | 1.99 | -1.23 |
| 2              | C6      | 17.22   | 0.007  | -0.99  | 1.99 | -1.24 |
| 3              | Se7     | 32.86   | 0.559  | -40.29 | 3.92 | -0.71 |
| 4              | C9      | 15.26   | 0.030  | -1.84  | 2.08 | -1.23 |
| 5              | C10     | 15.26   | 0.030  | -1.84  | 2.07 | -1.05 |
| 6              | C11     | 17.68   | 0.012  | -1.14  | 2.03 | -1.26 |
| 7              | C12     | 0.88    | 0.008  | -0.51  | 0.32 | -0.04 |
| Added spheres: |         | 29.12   | 0.253  | -15.03 | 0.00 | 0.00  |

After PCM corrections, the SCF energy is -2631.22423635 a.u.

|                                                |                                 |  |
|------------------------------------------------|---------------------------------|--|
| B3LYP/6-31+G**<br>SCRF=PCM(CH <sub>3</sub> CN) | <sup>-</sup> OCOCF <sub>3</sub> |  |
|------------------------------------------------|---------------------------------|--|

Variational PCM results

```
=====
<psi(f)| H |psi(f)> (a.u.) = -
526.299669
<psi(f)|H+V(f)/2|psi(f)> (a.u.) = -
526.393784
Total free energy in solution:
with all non electrostatic terms (a.u.) = -
526.384587
-----
```

(Polarized solute)-Solvent (kcal/mol) = -59.06

```
-----
Cavitation energy (kcal/mol) = 12.26
Dispersion energy (kcal/mol) = -7.07
Repulsion energy (kcal/mol) = 0.58
Total non electrostatic (kcal/mol) = 5.77
-----
```

Partition over spheres:

| Sphere         | on Atom | Surface | Charge | GEI    | GCav | GDR   |
|----------------|---------|---------|--------|--------|------|-------|
| 1              | O1      | 17.14   | 0.284  | -19.46 | 2.34 | -1.27 |
| 2              | C2      | 4.40    | -0.001 | -0.07  | 0.88 | -0.28 |
| 3              | O3      | 17.30   | 0.281  | -19.00 | 2.32 | -1.32 |
| 4              | C4      | 0.08    | -0.001 | 0.06   | 0.23 | 0.00  |
| 5              | F5      | 14.53   | 0.077  | -3.53  | 2.13 | -1.17 |
| 6              | F6      | 15.27   | 0.078  | -3.59  | 2.18 | -1.23 |
| 7              | F7      | 15.28   | 0.078  | -3.55  | 2.18 | -1.23 |
| Added spheres: |         | 27.37   | 0.154  | -9.93  | 0.00 | 0.00  |

After PCM corrections, the SCF energy is -526.393783856 a.u.

|                                                |           |  |
|------------------------------------------------|-----------|--|
| B3LYP/6-31+G**<br>SCRF=PCM(CH <sub>3</sub> CN) | <b>12</b> |  |
|------------------------------------------------|-----------|--|

Variational PCM results

```
=====
<psi(f)| H |psi(f)> (a.u.) = -
576.007956
<psi(f)|H+V(f)/2|psi(f)> (a.u.) = -
576.094131
Total free energy in solution:
with all non electrostatic terms (a.u.) = -
576.077899
-----
```

(Polarized solute)-Solvent (kcal/mol) = -54.08

Cavitation energy (kcal/mol) = 22.14  
 Dispersion energy (kcal/mol) = -12.78  
 Repulsion energy (kcal/mol) = 0.83  
 Total non electrostatic (kcal/mol) = 10.19

--

Partition over spheres:

| Sphere         | on Atom | Surface | Charge | GE1    | GCav | GDR   |
|----------------|---------|---------|--------|--------|------|-------|
| 1              | C3      | 17.31   | -0.044 | -1.88  | 2.00 | -1.29 |
| 2              | C4      | 17.05   | -0.046 | -2.06  | 2.00 | -1.30 |
| 3              | C6      | 17.90   | -0.049 | -2.20  | 2.00 | -1.32 |
| 4              | C7      | 11.99   | -0.058 | -3.23  | 1.84 | -0.97 |
| 5              | C9      | 9.22    | -0.043 | -2.32  | 1.56 | -0.62 |
| 6              | C10     | 0.00    | 0.000  | 0.00   | 0.08 | 0.00  |
| 7              | C14     | 4.68    | -0.087 | -5.93  | 0.68 | -0.30 |
| 8              | C16     | 45.95   | -0.261 | -12.28 | 5.00 | -2.33 |
| 9              | C18     | 0.00    | 0.000  | 0.00   | 0.08 | 0.00  |
| 10             | C19     | 27.46   | -0.250 | -13.41 | 2.91 | -1.78 |
| 11             | O22     | 5.55    | 0.003  | 0.02   | 1.11 | -0.50 |
| 12             | C23     | 1.40    | -0.021 | -1.10  | 0.54 | -0.11 |
| 13             | O24     | 19.96   | 0.068  | 1.74   | 2.35 | -1.43 |
| Added spheres: |         | 43.66   | -0.205 | -11.43 | 0.00 | 0.00  |

--

After PCM corrections, the SCF energy is -576.094130560 a.u.

--

|                                   |           |  |
|-----------------------------------|-----------|--|
| <b>B3LYP/6-31+G**</b>             | <b>14</b> |  |
| <b>SCRF=PCM(CH<sub>3</sub>CN)</b> |           |  |

Variational PCM results

=====

<psi(f)| H |psi(f)> (a.u.) = -  
 575.994764

<psi(f)|H+V(f)/2|psi(f)> (a.u.) = -  
 576.091414

Total free energy in solution:

with all non electrostatic terms (a.u.) = -  
 576.075999

--

(Polarized solute)-Solvent (kcal/mol) = -60.65

--

Cavitation energy (kcal/mol) = 21.87  
 Dispersion energy (kcal/mol) = -13.02  
 Repulsion energy (kcal/mol) = 0.83  
 Total non electrostatic (kcal/mol) = 9.67

--

Partition over spheres:

| Sphere | on Atom | Surface | Charge | GE1    | GCav | GDR   |
|--------|---------|---------|--------|--------|------|-------|
| 1      | O1      | 18.81   | 0.174  | 1.76   | 2.31 | -1.40 |
| 2      | C2      | 2.31    | -0.019 | -0.68  | 0.54 | -0.16 |
| 3      | O3      | 6.20    | 0.044  | 0.91   | 0.98 | -0.55 |
| 4      | C5      | 21.15   | -0.212 | -10.92 | 2.78 | -1.60 |

```

5      C7      5.30 -0.075 -4.36  0.85 -0.54
6      C10     42.59 -0.146 -5.95  4.67 -2.26
7      C12      0.28 -0.004 -0.25  0.14 -0.02
8      C15      0.49 -0.003 -0.16  0.27 -0.04
9      C16     10.74 -0.065 -3.67  1.74 -0.95
10     C18      8.43 -0.052 -2.96  1.60 -0.74
11     C19     17.38 -0.098 -5.14  2.00 -1.32
12     C21     17.37 -0.098 -5.20  2.00 -1.34
13     C22     17.23 -0.121 -6.27  1.99 -1.28
Added spheres: 52.20 -0.317 -17.75  0.00  0.00

```

After PCM corrections, the SCF energy is -576.091414269 a.u.

|                                                |    |  |
|------------------------------------------------|----|--|
| B3LYP/6-31+G**<br>SCRF=PCM(CH <sub>3</sub> CN) | 2f |  |
|------------------------------------------------|----|--|

Variational PCM results

```

=====
<psi(f)| H |psi(f)> (a.u.) = -
575.678648
<psi(f)|H+V(f)/2|psi(f)> (a.u.) = -
575.702411
Total free energy in solution:
with all non electrostatic terms (a.u.) = -
575.686962

```

(Polarized solute)-Solvent (kcal/mol) = -14.91

```

Cavitation energy (kcal/mol) = 21.77
Dispersion energy (kcal/mol) = -12.95
Repulsion energy (kcal/mol) = 0.88
Total non electrostatic (kcal/mol) = 9.69

```

Partition over spheres:

```

Sphere on Atom Surface Charge GE1 GCav GDR
1      C1      5.43 -0.053 -0.89  0.85 -0.54
2      C2      0.29 -0.001 -0.01  0.20 -0.02
3      C3     16.08 -0.055 -0.73  2.23 -1.32
4      C4      3.14 -0.012  0.07  0.66 -0.22
5      O5      6.27  0.064 -1.11  0.99 -0.53
6      C6      0.44  0.001  0.00  0.21 -0.02
7      O7     20.91  0.257 -6.47  2.40 -1.46
8      C8      8.63 -0.017 -0.49  1.62 -0.77
9      C9     17.32 -0.034 -0.88  2.00 -1.33
10     C10     17.40 -0.035 -0.87  2.00 -1.29
11     C11     17.30 -0.033 -0.83  1.99 -1.32
12     C12     12.32 -0.028 -0.69  1.89 -1.00
13     C13     42.44 -0.063 -0.38  4.74 -2.26
Added spheres: 49.99 -0.017 -1.63  0.00  0.00

```

After PCM corrections, the SCF energy is -575.702411411 a.u.

|                                                |    |  |
|------------------------------------------------|----|--|
| B3LYP/6-31+G**<br>SCRF=PCM(CH <sub>3</sub> CN) | 4f |  |
|------------------------------------------------|----|--|

Variational PCM results

=====

<psi(f)| H |psi(f)> (a.u.) = -  
575.668755

<psi(f)|H+V(f)/2|psi(f)> (a.u.) = -  
575.690484

Total free energy in solution:  
with all non electrostatic terms (a.u.) = -  
575.674963

-----  
(Polarized solute)-Solvent (kcal/mol) = -13.63  
-----

-----  
Cavitation energy (kcal/mol) = 21.61  
Dispersion energy (kcal/mol) = -12.73  
Repulsion energy (kcal/mol) = 0.87  
Total non electrostatic (kcal/mol) = 9.74  
-----

-----  
Partition over spheres:

| Sphere         | on Atom | Surface | Charge | GE1   | GCav | GDR   |
|----------------|---------|---------|--------|-------|------|-------|
| 1              | C1      | 0.00    | 0.000  | 0.00  | 0.00 | 0.00  |
| 2              | C2      | 11.35   | -0.077 | -1.73 | 1.54 | -0.82 |
| 3              | C3      | 20.56   | -0.078 | -1.02 | 2.33 | -1.47 |
| 4              | C4      | 2.22    | -0.010 | 0.04  | 0.66 | -0.10 |
| 5              | O5      | 4.23    | 0.043  | -0.72 | 0.74 | -0.25 |
| 6              | O6      | 20.91   | 0.246  | -5.62 | 2.40 | -1.48 |
| 7              | C7      | 0.00    | 0.000  | 0.00  | 0.09 | 0.00  |
| 8              | C8      | 42.65   | -0.070 | -0.53 | 4.45 | -2.17 |
| 9              | C9      | 9.33    | -0.024 | -0.73 | 1.55 | -0.70 |
| 10             | C10     | 17.33   | -0.025 | -0.76 | 2.00 | -1.34 |
| 11             | C11     | 17.42   | -0.023 | -0.69 | 2.00 | -1.30 |
| 12             | C12     | 17.28   | -0.023 | -0.62 | 1.99 | -1.33 |
| 13             | C13     | 11.44   | -0.017 | -0.24 | 1.85 | -0.90 |
| Added spheres: |         | 42.12   | 0.030  | -1.01 | 0.00 | 0.00  |

-----  
After PCM corrections, the SCF energy is -575.690483702 a.u.  
-----

|                                                |       |  |
|------------------------------------------------|-------|--|
| B3LYP/6-31+G**<br>SCRF=PCM(CH <sub>3</sub> CN) | TS 19 |  |
|------------------------------------------------|-------|--|

Variational PCM results

=====

<psi(f)| H |psi(f)> (a.u.) = -  
575.946953

<psi(f)|H+V(f)/2|psi(f)> (a.u.) = -  
576.043233

```

Total free energy in solution:
  with all non electrostatic terms          (a.u.) = -
576.028425
-----
--
(Polarized solute)-Solvent                 (kcal/mol) = -60.42
-----
--
Cavitation energy                          (kcal/mol) = 21.03
Dispersion energy                          (kcal/mol) = -12.54
Repulsion energy                           (kcal/mol) = 0.80
Total non electrostatic                    (kcal/mol) = 9.29
-----
--
Partition over spheres:
Sphere  on Atom  Surface  Charge  GE1    GCav   GDR
  1     C3       18.19  -0.113 -5.96   1.97  -1.25
  2     C4       17.60  -0.123 -6.98   1.92  -1.26
  3     C6       16.83  -0.125 -6.45   1.95  -1.27
  4     C7        8.94  -0.100 -6.45   1.17  -0.68
  5     C9       11.71  -0.092 -4.55   1.67  -0.93
  6    C10        0.99  -0.007 -0.33   0.20  -0.03
  7    C14        5.27  -0.098 -6.69   0.85  -0.47
  8    C16       47.01  -0.155 -6.43   4.90  -2.45
  9    C18        0.00   0.000  0.00   0.00   0.00
 10    C19       22.50  -0.174 -8.42   2.77  -1.56
 11    O22        4.95   0.033  0.74   0.88  -0.37
 12    C23        1.66  -0.015 -0.55   0.44  -0.10
 13    O24       18.75   0.166  2.09   2.31  -1.39
Added spheres:    37.13  -0.187 -10.43  0.00   0.00
-----
--
After PCM corrections, the SCF energy is -576.043233174 a.u.
-----
--

```

|                                                      |              |  |
|------------------------------------------------------|--------------|--|
| <b>B3LYP/6-31+G**<br/>SCRF=PCM(CH<sub>3</sub>CN)</b> | <b>TS 13</b> |  |
|------------------------------------------------------|--------------|--|

```

Variational PCM results
=====
<psi(f)| H |psi(f)> (a.u.) = -
575.966852
<psi(f)|H+V(f)/2|psi(f)> (a.u.) = -
576.058756
Total free energy in solution:
  with all non electrostatic terms          (a.u.) = -
576.042792
-----
--
(Polarized solute)-Solvent                 (kcal/mol) = -57.67
-----
--
Cavitation energy                          (kcal/mol) = 22.18
Dispersion energy                          (kcal/mol) = -12.95
Repulsion energy                           (kcal/mol) = 0.79
Total non electrostatic                    (kcal/mol) = 10.02

```

-----  
--  
Partition over spheres:

| Sphere         | on Atom | Surface | Charge | GE1    | GCav | GDR   |
|----------------|---------|---------|--------|--------|------|-------|
| 1              | C5      | 11.31   | -0.030 | -1.55  | 1.51 | -0.62 |
| 2              | C6      | 20.37   | -0.066 | -3.12  | 2.00 | -1.35 |
| 3              | C7      | 47.68   | -0.250 | -11.61 | 4.84 | -2.39 |
| 4              | O10     | 7.52    | 0.016  | 0.34   | 1.07 | -0.51 |
| 5              | C11     | 0.13    | -0.004 | -0.28  | 0.08 | 0.00  |
| 6              | O12     | 21.91   | 0.140  | 2.55   | 2.33 | -1.40 |
| 7              | C13     | 5.28    | -0.057 | -2.69  | 0.55 | -0.21 |
| 8              | C14     | 0.44    | -0.008 | -0.49  | 0.12 | 0.00  |
| 9              | C15     | 1.63    | -0.009 | -0.54  | 0.24 | 0.00  |
| 10             | C16     | 20.37   | -0.071 | -3.14  | 2.00 | -1.29 |
| 11             | C18     | 28.18   | -0.288 | -15.84 | 2.96 | -1.77 |
| 12             | C19     | 14.76   | -0.057 | -3.25  | 1.77 | -0.95 |
| 13             | C20     | 20.39   | -0.064 | -3.05  | 2.00 | -1.33 |
| 14             | H21     | 5.80    | -0.100 | -6.60  | 0.73 | -0.35 |
| Added spheres: |         | 19.42   | -0.144 | -8.40  | 0.00 | 0.00  |

-----

--  
After PCM corrections, the SCF energy is -576.058755590 a.u.  
-----  
--

- [1] M. Justik, G. Koser, *Molecules* **2005**, *10*, 217–225.  
[2] A. A. Zagulyaeva, M. S. Yusubov, V. V. Zhdankin, *J. Org. Chem.* **2010**, *75*, 2119–2122.  
[3] R. D. Richardson, J. M. Zayed, S. Altermann, D. Smith, T. Wirth, *Angew. Chem.* **2007**, *119*, 6649–6652; *Angew. Chem. Int. Ed.* **2007**, *46*, 6529–6532.  
[4] J.-M. Chen, X.-M. Zeng, K. Middleton, M. S. Yusubov, V. V. Zhdankin, *Synlett* **2011**, 1613–1617.  
[5] J. Gallos, A. Varvoglis, *J. Chem. Soc., Perkin Trans. 1* **1985**, 757–763.  
[6] a) M. Fujita, S. Okuno, H. J. Lee, T. Sugimura, T. Okuyama, *Tetrahedron Lett.* **2007**, *48*, 8691–8694; b) M. Fujita, Y. Yoshida, K. Miyata, A. Wakisaka, T. Sugimura, *Angew. Chem.* **2010**, *122*, 7222–7225; *Angew. Chem. Int. Ed.* **2010**, *49*, 7068–7071; c) M. Fujita, M. Wakita, T. Sugimura, *Chem. Commun.* **2011**, *47*, 3983–3985.  
[7] S. E. Denmark, M. G. Edwards, *J. Org. Chem.* **2006**, *71*, 7293–7306.  
[8] D. P. Hudgens, C. Taylor, T. W. Batts, M. K. Patel, M. L. Brown, *Bio. Med. Chem.* **2006**, *14*, 8366–8378.  
[9] F. Gualtieri, E. Teodori, C. Bellucci, E. Pesce, G. Piacenza, *J. Med. Chem.* **1985**, *28*, 1621–1628.  
[10] K. Takami, H. Yorimitsu, K. Oshima, *Org. Lett.* **2004**, *6*, 4555–4558.



- [11] E. Grovenstein, K. W. Black, S. C. Goel, R. L. Hughes, J. H. Northrop, D. L. Streeter, D. VanDerveer, *J. Org. Chem.* **1989**, *54*, 1671–1679.
- [12] a) D. M. Browne, O. Niyomura, T. Wirth, *Org. Lett.* **2007**, *9*, 3169–3171; b) J. Izquierdo, S. Rodriguez, F. V. Gonzalez, *Org. Lett.* **2011**, *13*, 3856–3859.
- [13] D. M. Browne, O. Niyomura, T. Wirth, *Phosphorus Sulfur* **2008**, *183*, 1026–1035.
- [14] J.-M. Garnier, S. Robin, G. Rousseau, *Eur. J. Org. Chem.* **2007**, 3281–3291.
- [15] J.-M. Garnier, S. Robin, R. Guillot, G. Rousseau, *Tetrahedron: Asymm.* **2007**, *18*, 1434–1442.
- [16] A. A. Scholte, John C. Vederas, *Org. Biomol. Chem.* **2006**, *4*, 730–742.
- [17] A. R. Katritzky, D. Feng, H. Lang, *J. Org. Chem.* **1997**, *62*, 715–720.
- [18] Y. Lei, Z.-Q. Wang, Y.-X. Xie, S.-C. Yu, B.-X. Tang, J.-H. Li, *Adv. Synth. Cat.* **2011**, *353*, 31–35.
- [19] L. Artok, M. Kuş, Ö. Aksın-Artok, F. N. Dege, F. Y. Özkılınç, *Tetrahedron* **2009**, *65*, 9125–9133.
- [20] S. Lamandé-Langle, S. I. Ngi, E. Anselmi, H. Allouchi, A. Duchêne, M. Abarbri, J. Thibonnet, *Synthesis* **2011**, 154–160.
- [21] Y. Kita, J. Sekihachi, Y. Hayashi, Y.-Z. Da, M. Yamamoto, S. Akai, *J. Org. Chem.* **1990**, *55*, 1108–1112.
- [22] J. Delaunay, A. Orliac-Lemoing, J. Simonet, *Tetrahedron* **1988**, *44*, 7089–7094.
- [23] L. Zhou, L. Lin, J. Ji, M. Xie, X. Liu, X. Feng, *Org. Lett.* **2011**, *13*, 3056–3059.
- [24] K. Oishi, K. Kurosawa, *Bull. Chem. Soc. Japan* **1980**, *53*, 179–184.
- [25] Y.-Z. Chen, L.-Z. Wu, M.-L. Peng, D. Zhang, L.-P. Zhang, C.-H. Tung, *Tetrahedron* **2006**, *62*, 10688–10693.
- [26] S. Nicolai, S. Erard, D. F. González, J. Waser, *Org. Lett.* **2010**, *12*, 384–387; b) F. V. Singh, T. Wirth, *Org. Lett.* **2011**, *13*, 6504–6507.
- [27] C. Singh, C. S. Pandey, G. Saxena, N. Srivastava, M. Sharma, *J. Org. Chem.* **2006**, *71*, 9057–9061.
- [28] R. M. Bullock, B. J. Rappoli, *J. Am. Chem. Soc.* **1991**, *113*, 1659–1669.
- [29] E. J. Cragoe, E. A. M. Pietruszkiewicz, C. M. Robb, *J. Org. Chem.* **1958**, *23*, 971–980.
- [30] R. C. Larock, C. K. Reddy, *J. Org. Chem.* **2002**, *67*, 2027–2033.
- [31] M. J. Sofia, J. A. Katzenellenbogen, *J. Med. Chem.* **1986**, *29*, 230–238.
- [32] A. Kar, I. A. Sayyed, W. F. Lo, H. M. Kaiser, M. Beller, M. K. Tse, *Org. Lett.* **2007**, *9*, 3405–3408.
- [33] F. Bellina, C. Anselmi, F. Martina, R. Rossi, *Eur. J. Org. Chem.* **2003**, 2290–2302.
- [34] N. R. Sharma, G. S. Rawat, *Asian J. Chem.* **2004**, *16*, 978–982.
- [35] Gaussian 03, Revision E.01, Gaussian, Inc., Wallingford CT, 2004, see main text for full citation.
- [36] a) W. Kohn, A. D. Becke, R. G. Parr, *J. Phys. Chem.* **1996**, *100*, 12974–12980; b) A. D. Becke *J. Chem. Phys.* **1993**, *98*, 5648–5652; c) C. Lee, W. Yang, R. G. Parr *Phys. Rev. B* **1988**, *37*, 785–789; d) P. J. Stephens, F. J. Devlin, C. F. Chabalowski, M. J. Frisch *J. Phys. Chem.* **1994**, *98*, 11623–11627; e) S. H. Vosko, L. Wilk, M. Nusair *Can. J. Phys.* **1980**, *58*, 1200–1211.
- [37] a) W. J. Hehre, R. F. Stewart, J. A. Pople, *J. Chem. Phys.* **1969**, *51*, 2657–2667; b) J. S. Binkley, J. A. Pople, *J. Am. Chem. Soc.* **1980**, *102*, 939–947; c) W. J. Hehre, R. Ditchfield, J. A. Pople, *J. Chem. Phys.* **1972**, *56*, 2257–2261; d) R. Krishnan, J.

- S. Binkley, R. Seeger, J. A. Pople, *J. Chem. Phys.* **1980**, *72*, 650–654; e) M. J. Frisch, J. A. Pople, J. S. Binkley, *J. Chem. Phys.* **1984**, *80*, 3265–3269; f) M. M. Francl, W. J. Pietro, W. J. Hehre, J. S. Binkley, M. S. Gordon, D. J. DeFrees, J. A. Pople, *J. Chem. Phys.* **1982**, *77*, 3654–3665.
- [38] a) P. J. Hay, W. R. Wadt, *J. Chem. Phys.* **1985**, *82*, 270–283; b) W. R. Wadt, P. J. Hay, *J. Chem. Phys.* **1985**, *82*, 284–298; c) P. J. Hay, W. R. Wadt, *J. Chem. Phys.* **1985**, *82*, 299–310.
- [39] a) E. Cancès, B. Mennucci, J. Tomasi, *J. Chem. Phys.* **1997**, *107*, 3032–3041; b) J. Tomasi, B. Mennucci, R. Cammi, *Chem. Rev.* **2005**, *105*, 2999–3093; c) A. Klamt, B. Mennucci, J. Tomasi, V. Barone, C. Curutchet, M. Orozco, F. J. Luque, *Acc. Chem. Res.* **2009**, *42*, 489–492.
- [40] J. W. McIver, A. Komornicki, *J. Am. Chem. Soc.* **1972**, *94*, 2625–2633.
- [41] a) C. Gonzales, H. B. Schlegel, *J. Phys. Chem.* **1989**, *90*, 2154–2161; b) C. Gonzales, H. B. Schlegel, *J. Chem. Phys.* **1990**, *94*, 5523–5527.
- [42] Free visualization software Gabedit 2.2.9 by A.-R. Allouche:  
<http://gabedit.sourceforge.net/>. See also: A.-R. Allouche, *J. Comp. Chem.* **2011**, *32*, 174–182.

NMR spectra (solvents and frequencies are found in the data above)

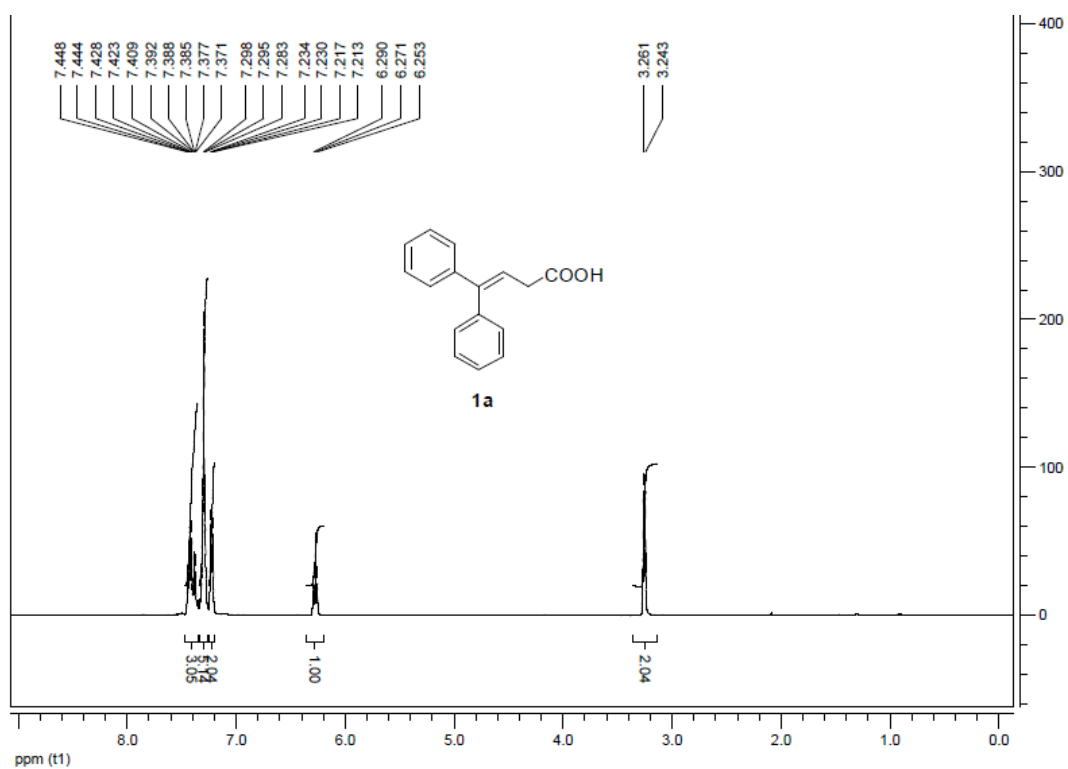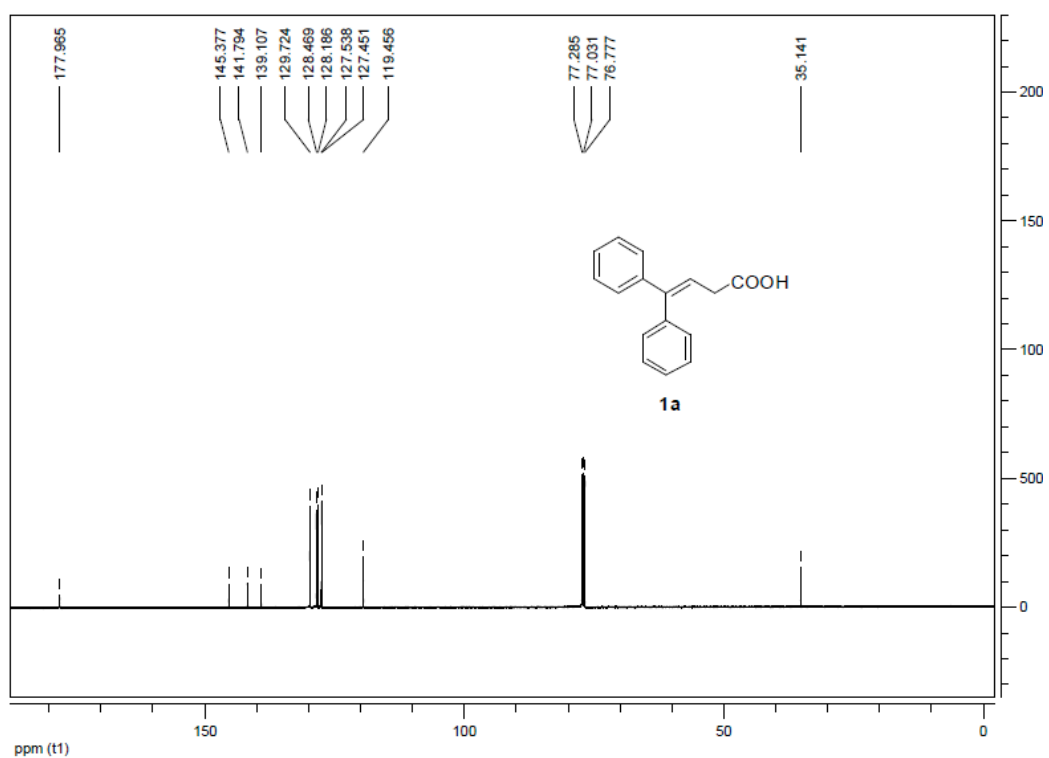

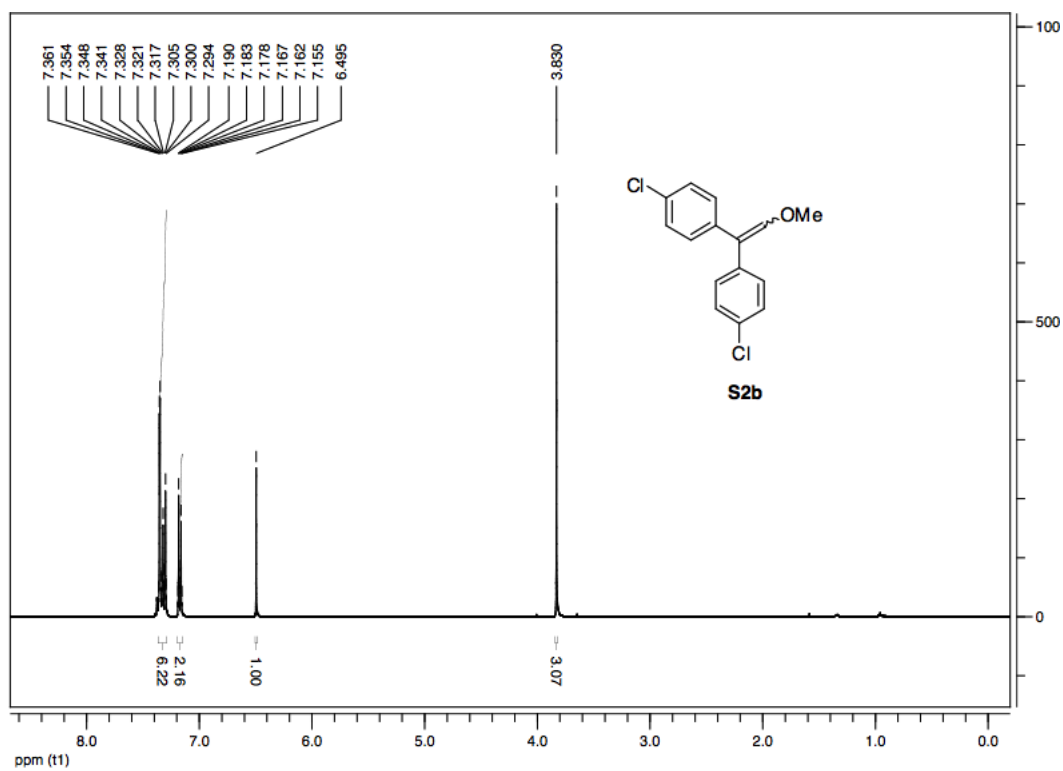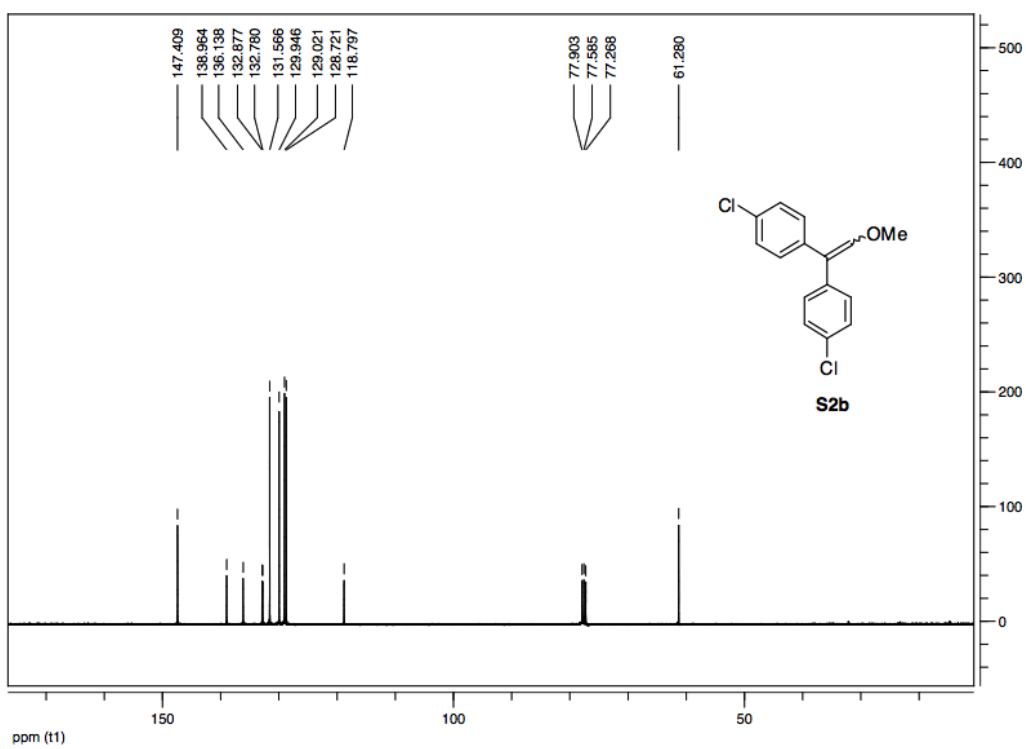

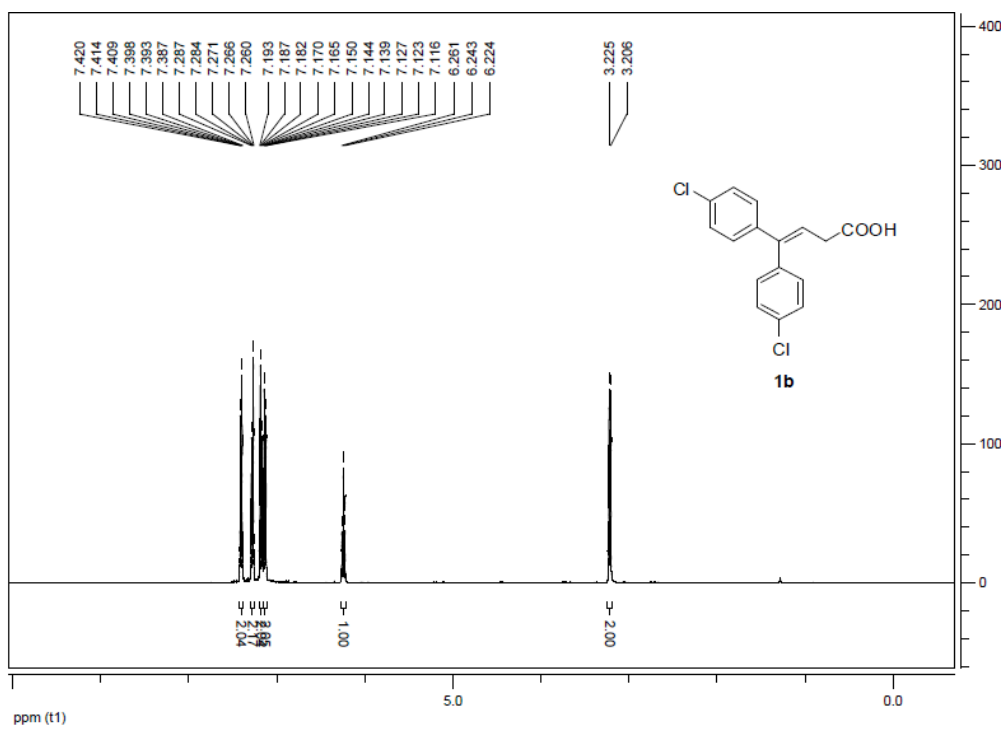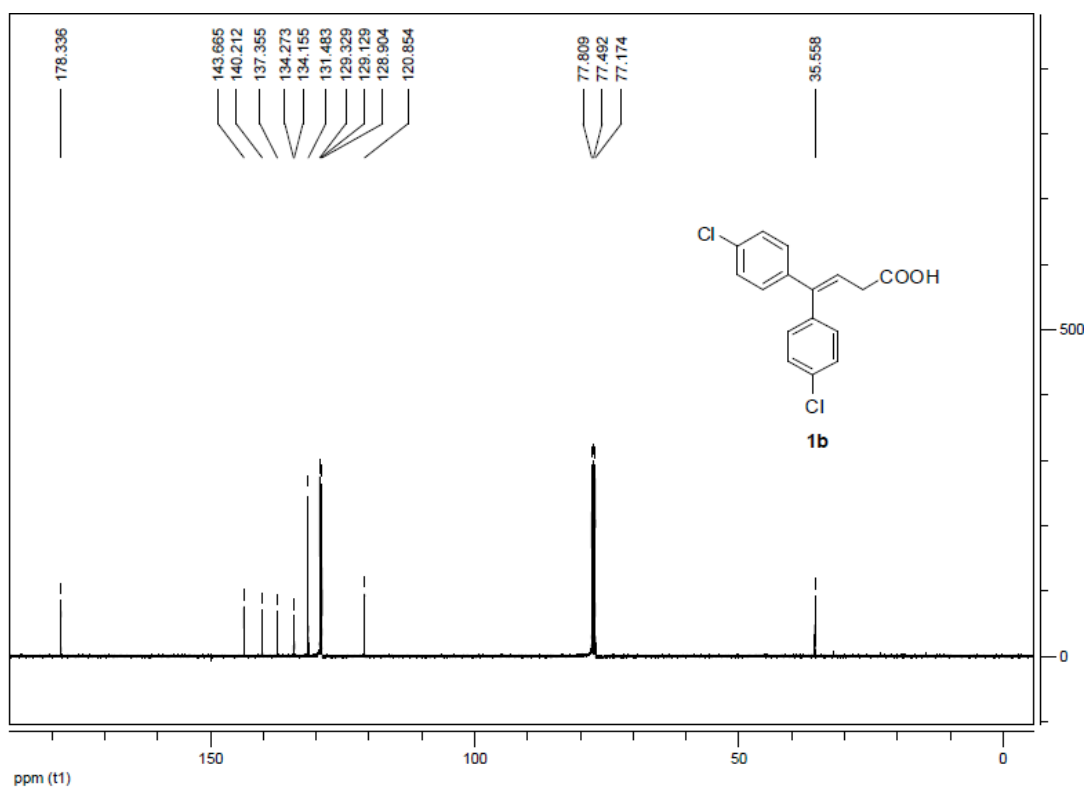



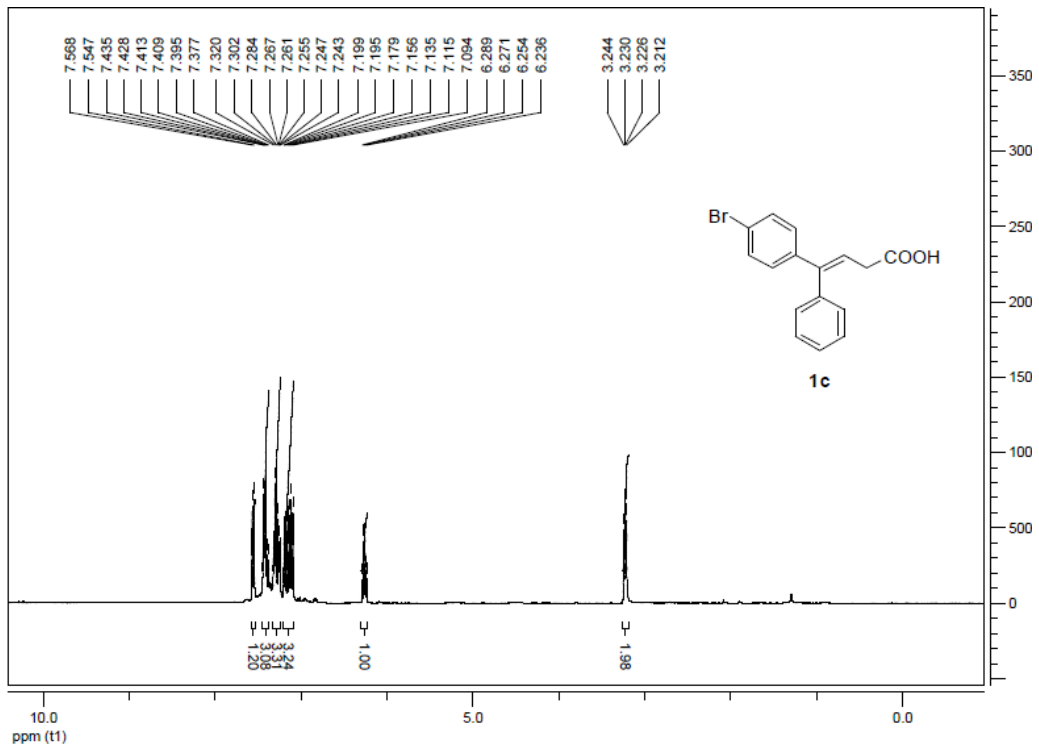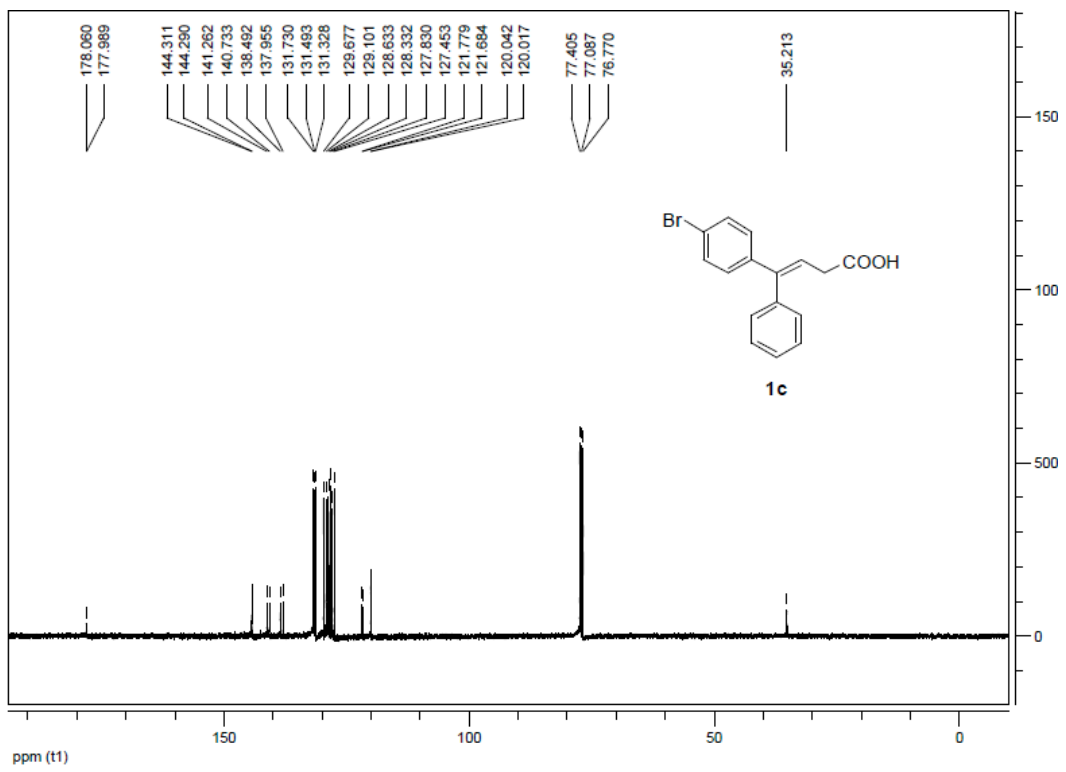

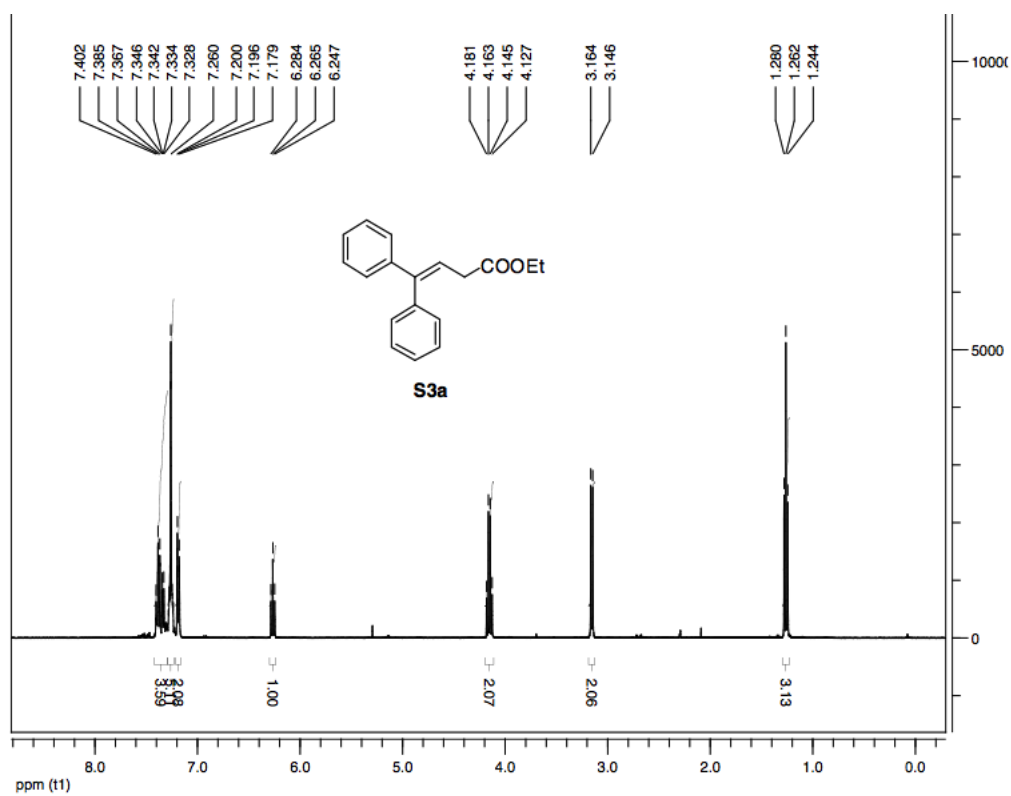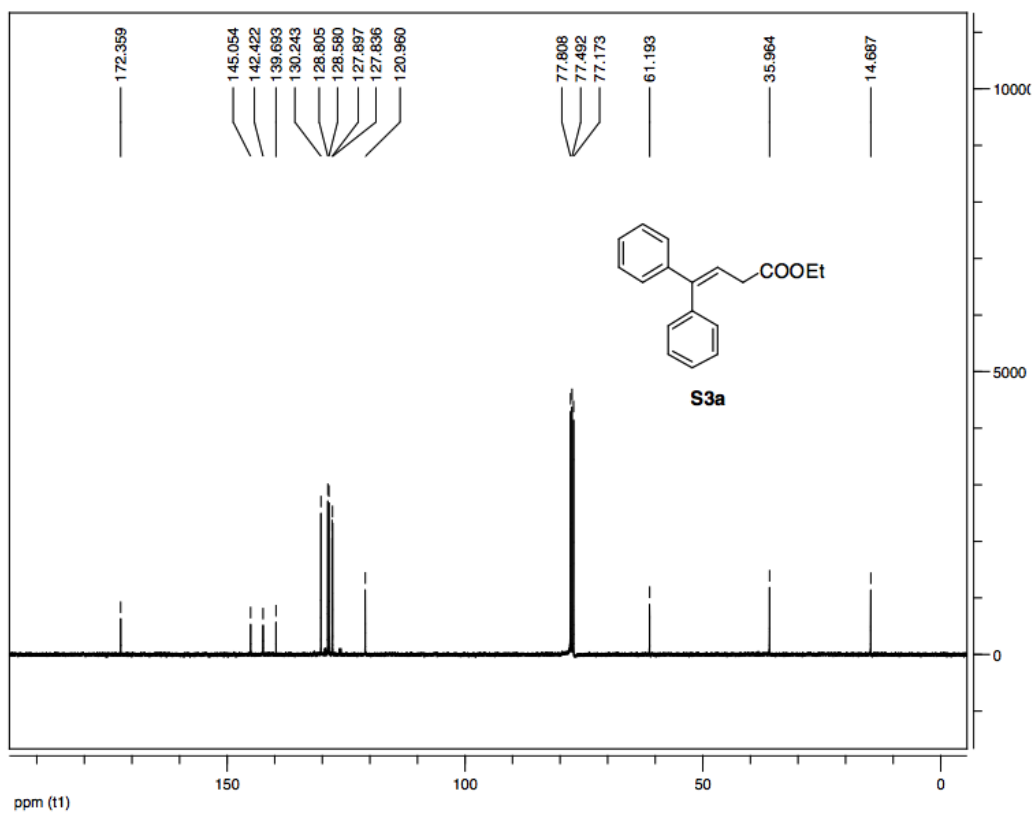



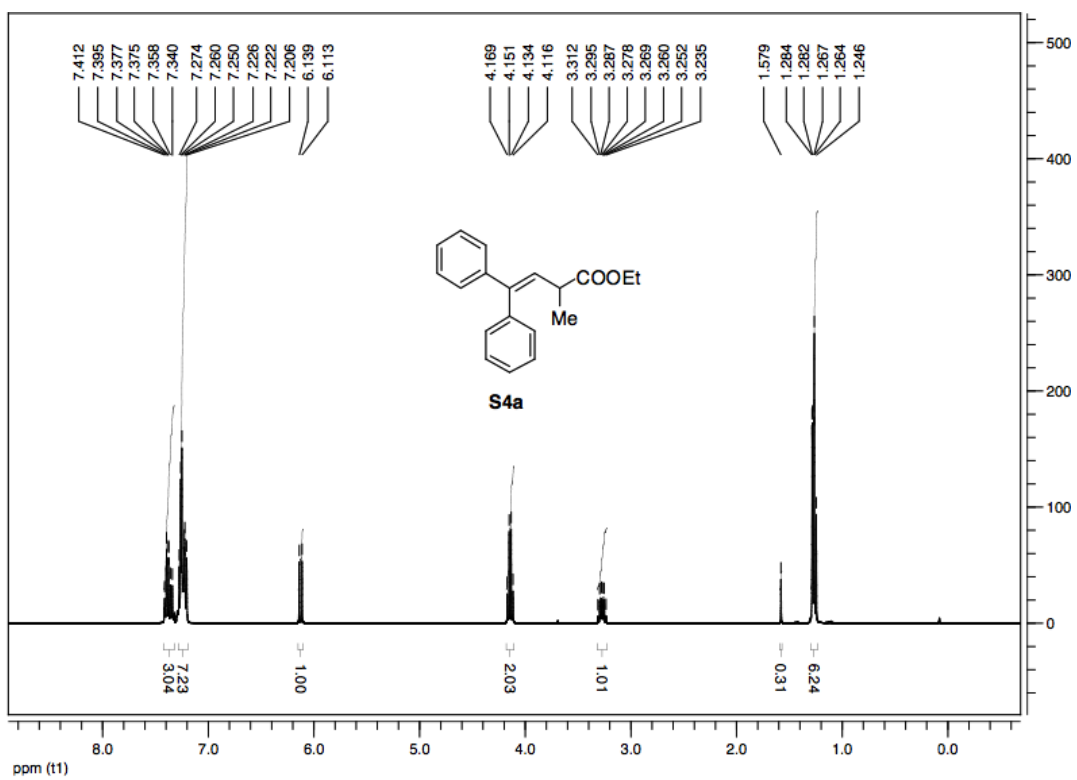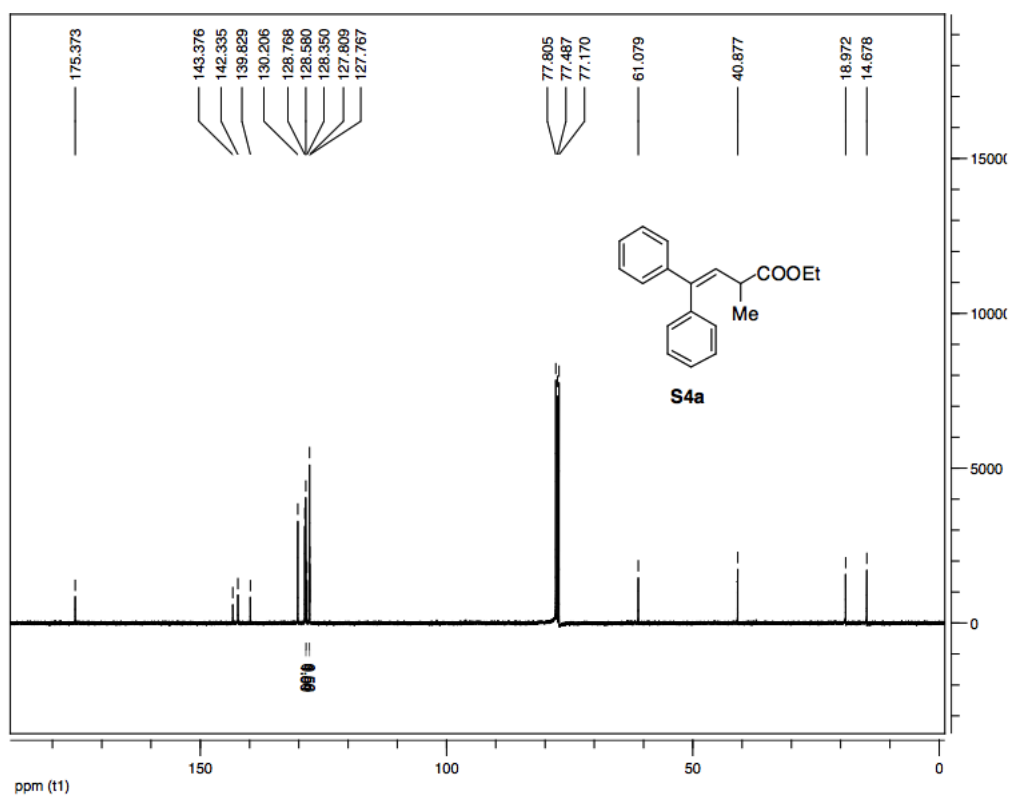

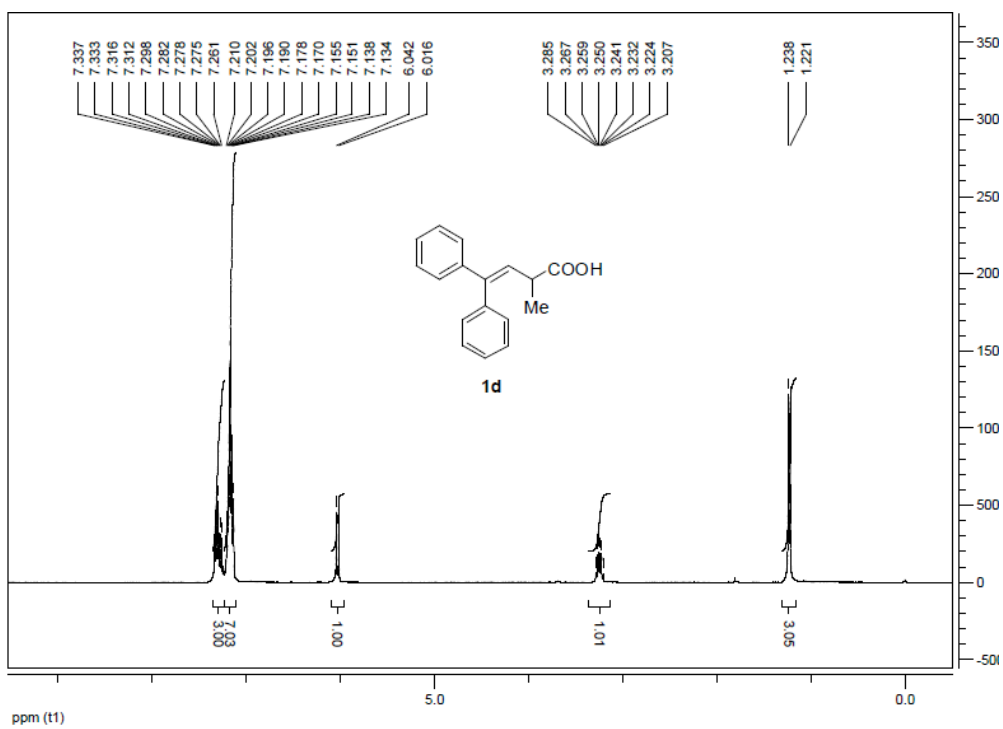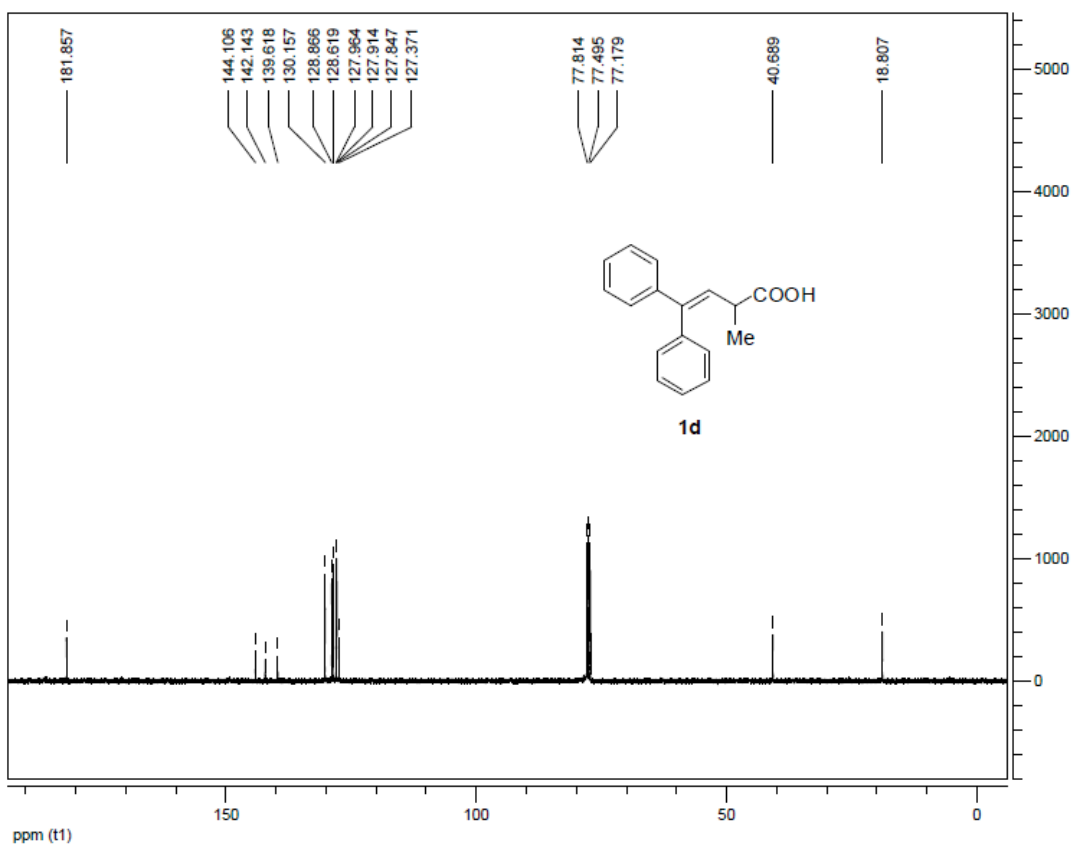

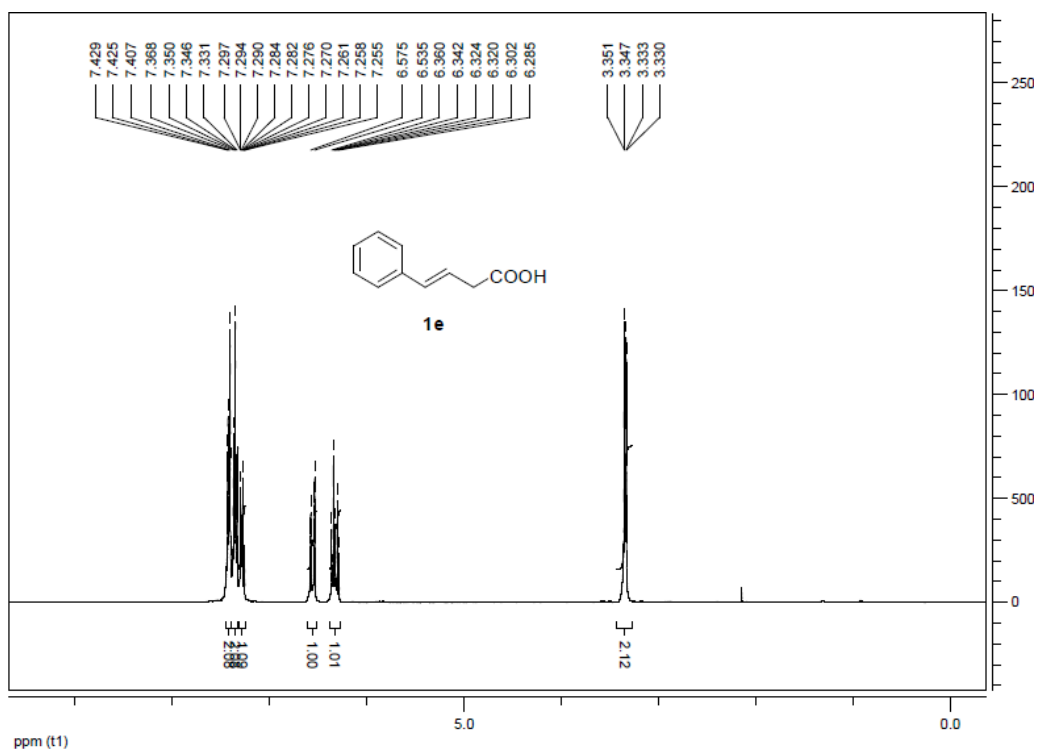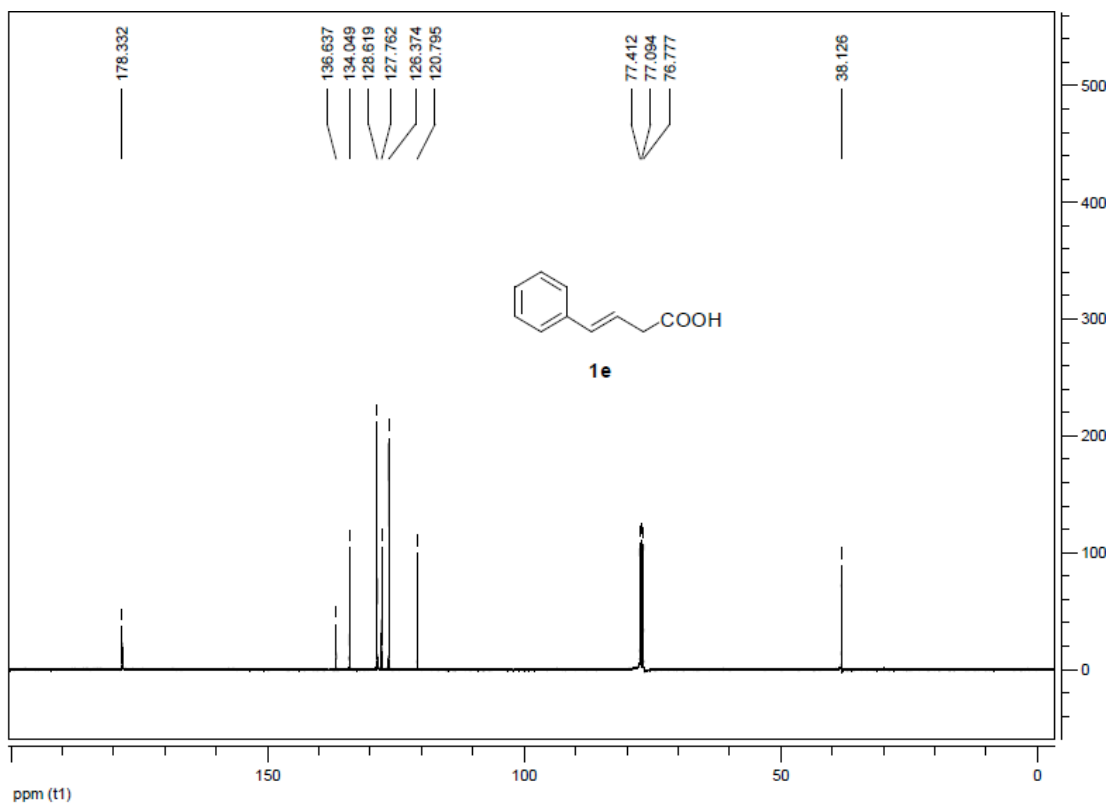

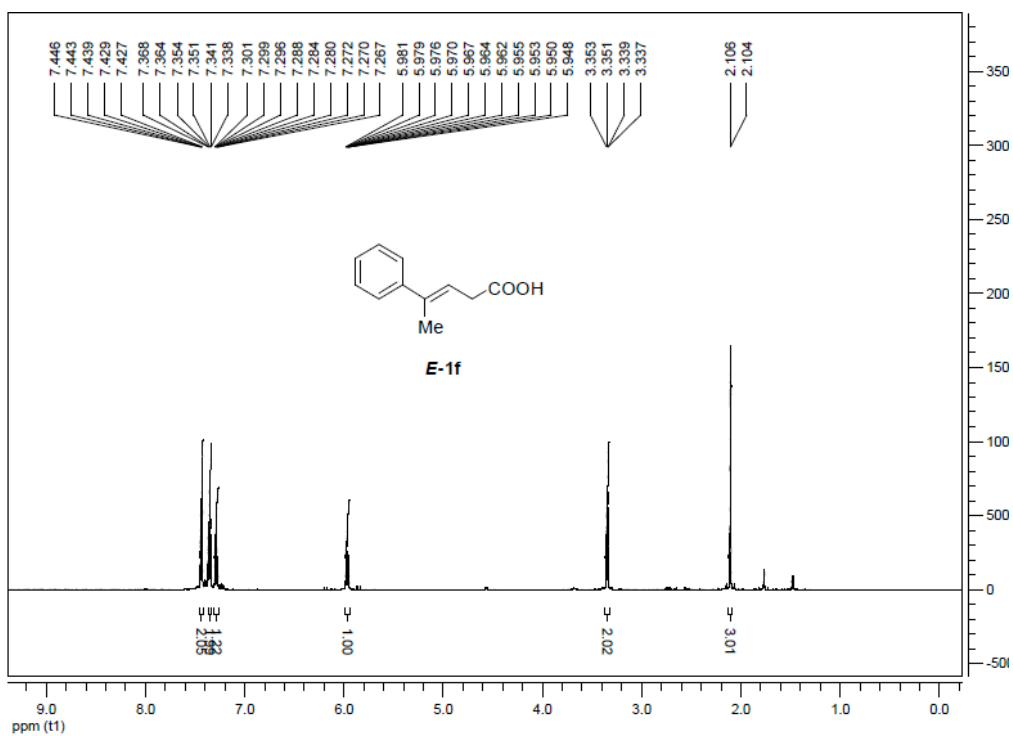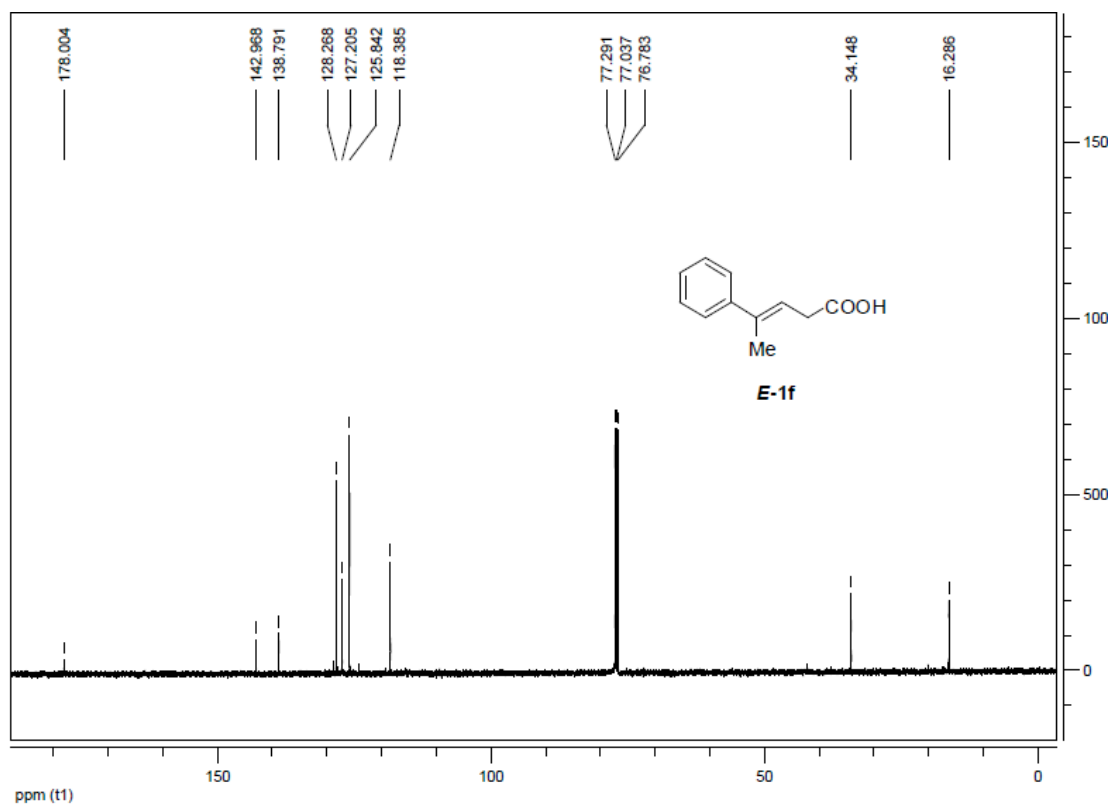

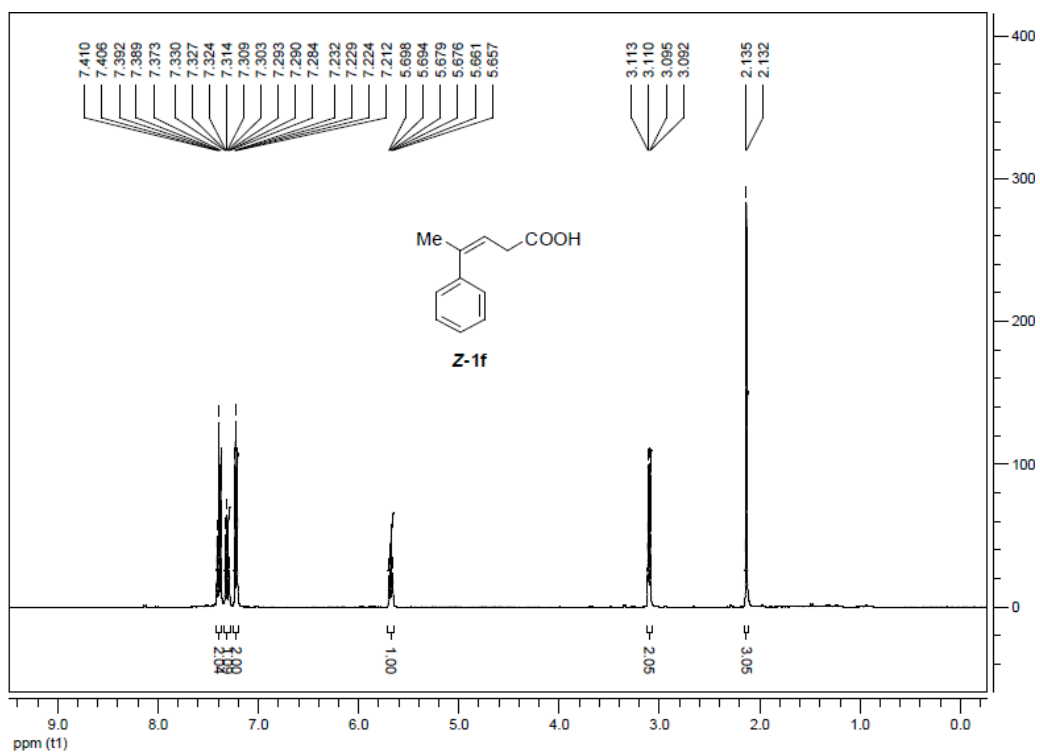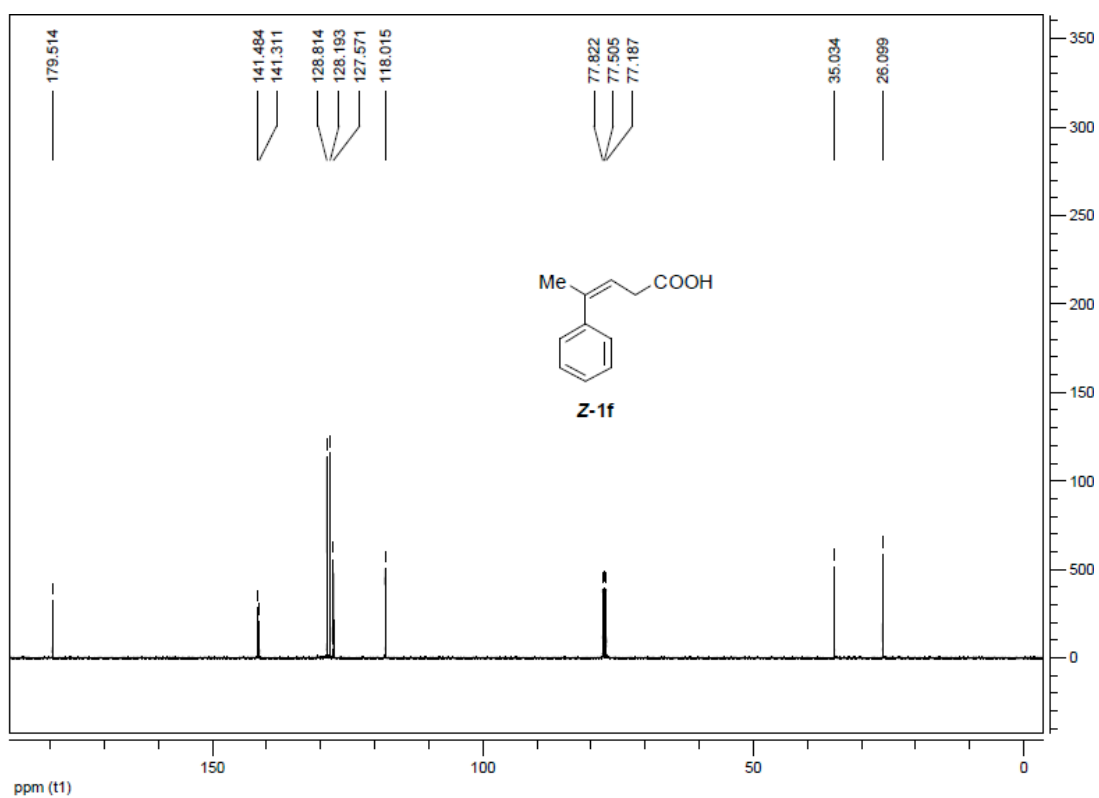

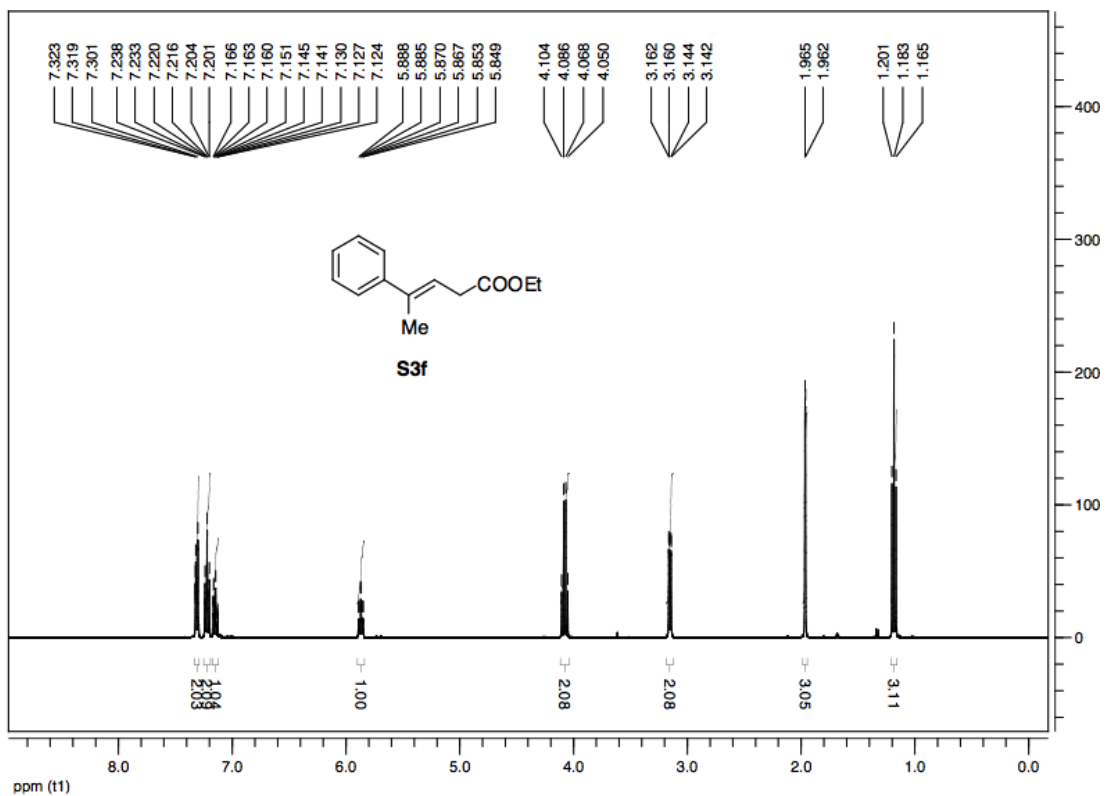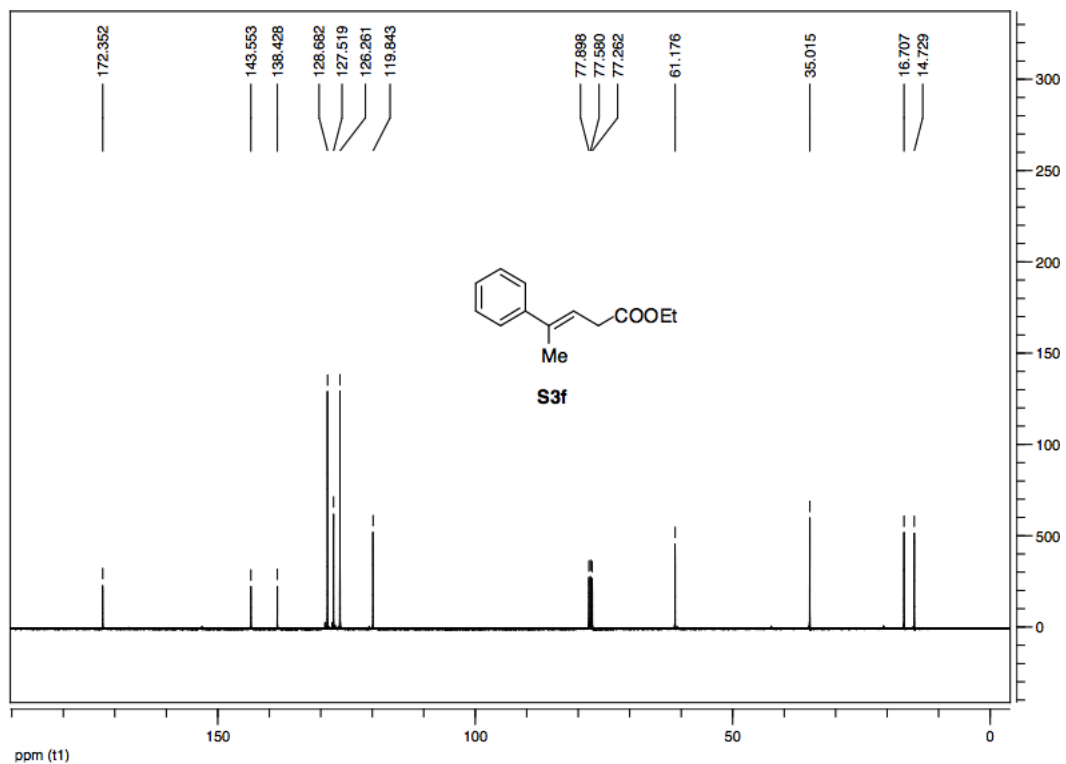

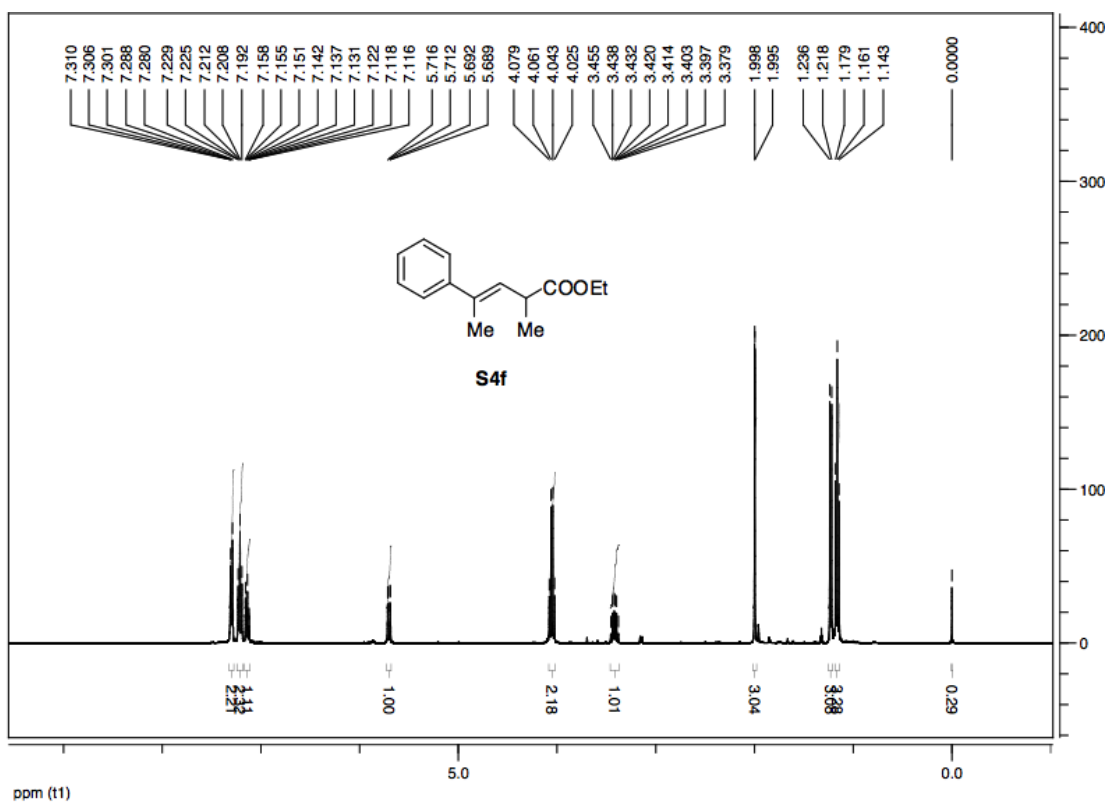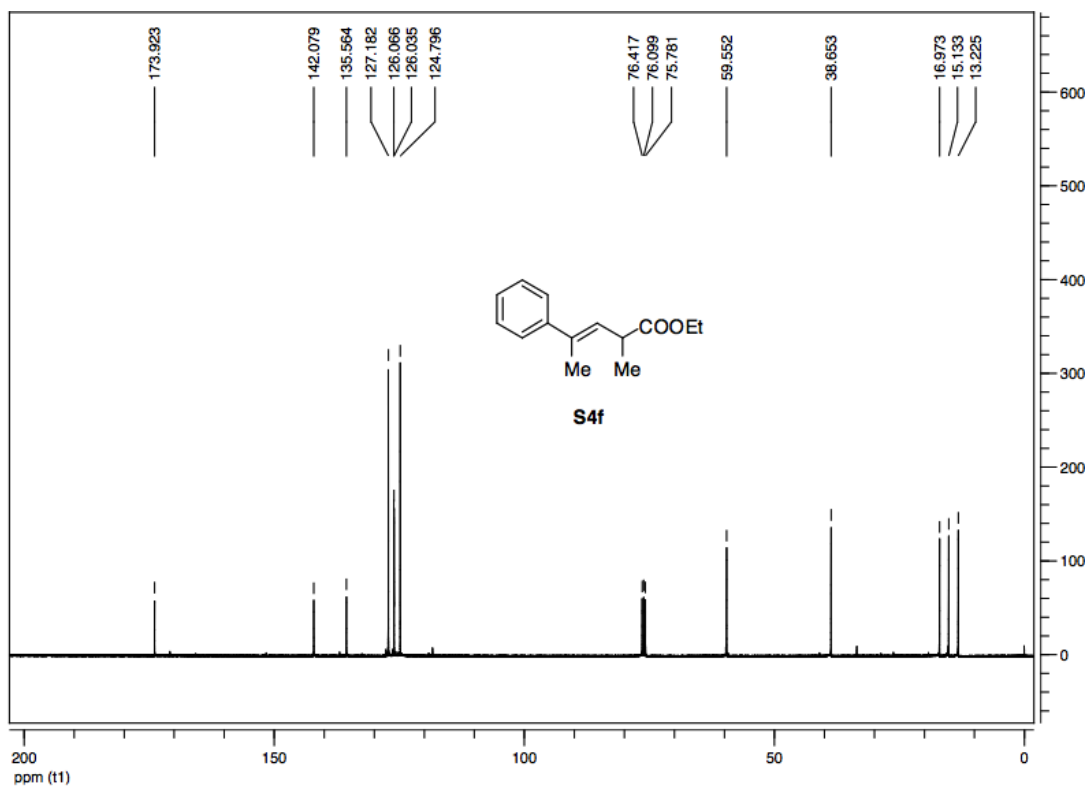

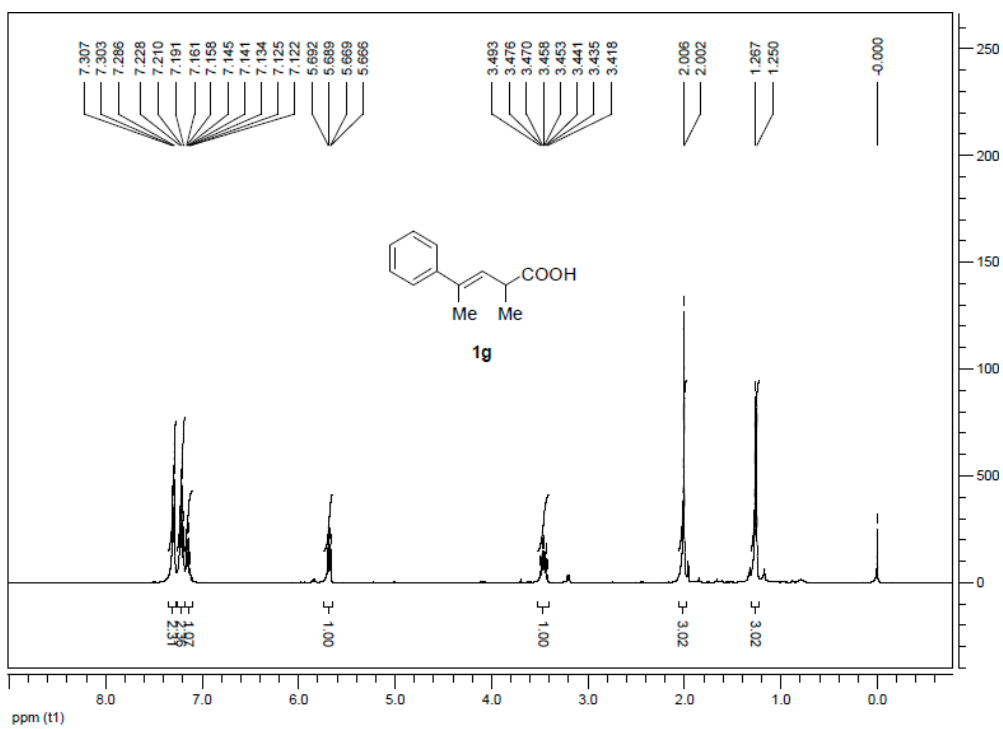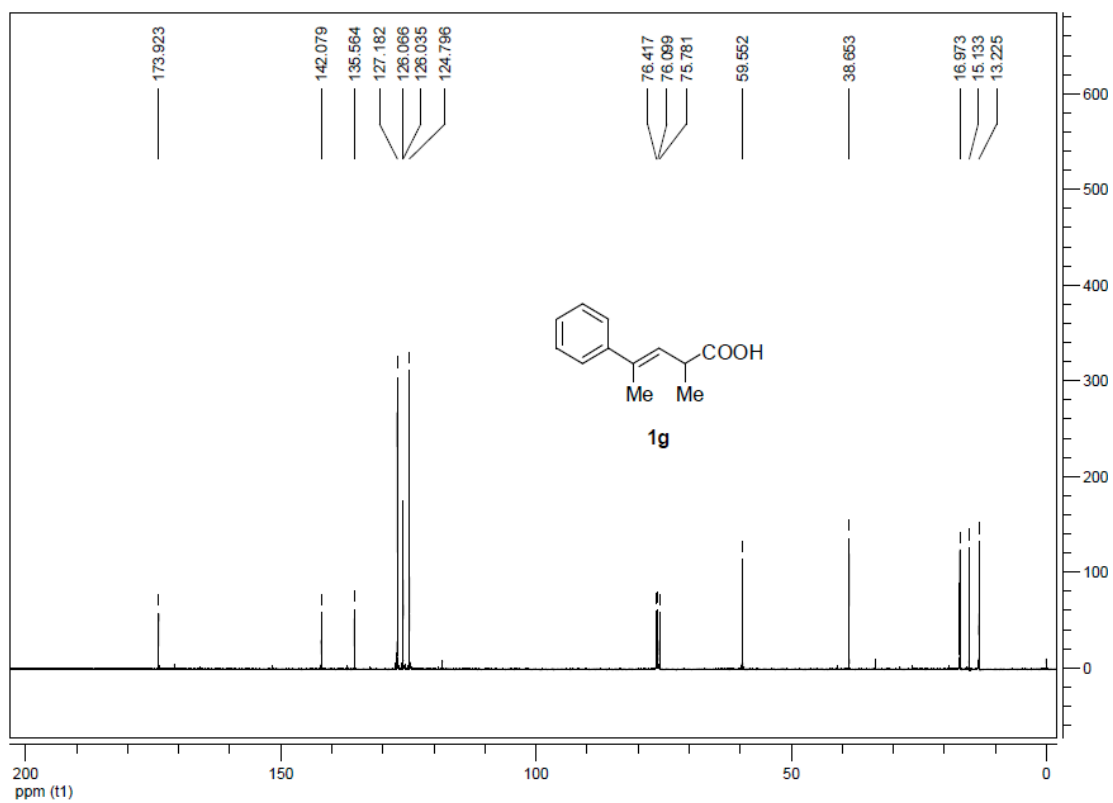



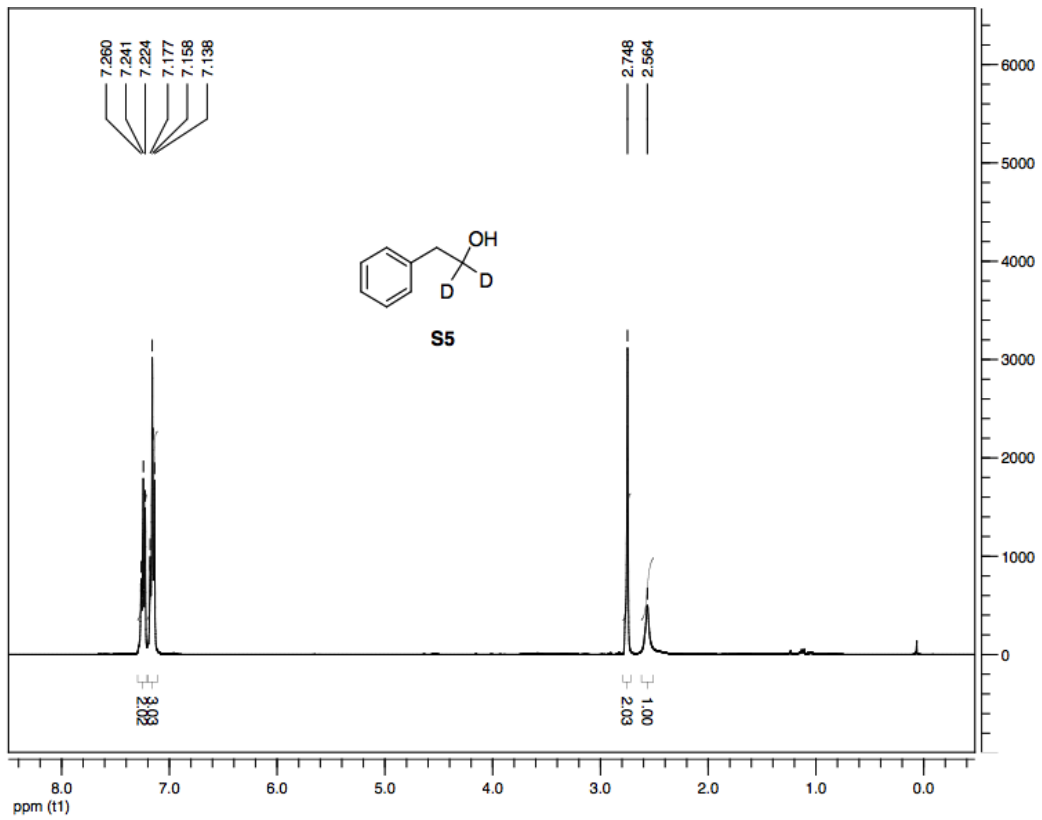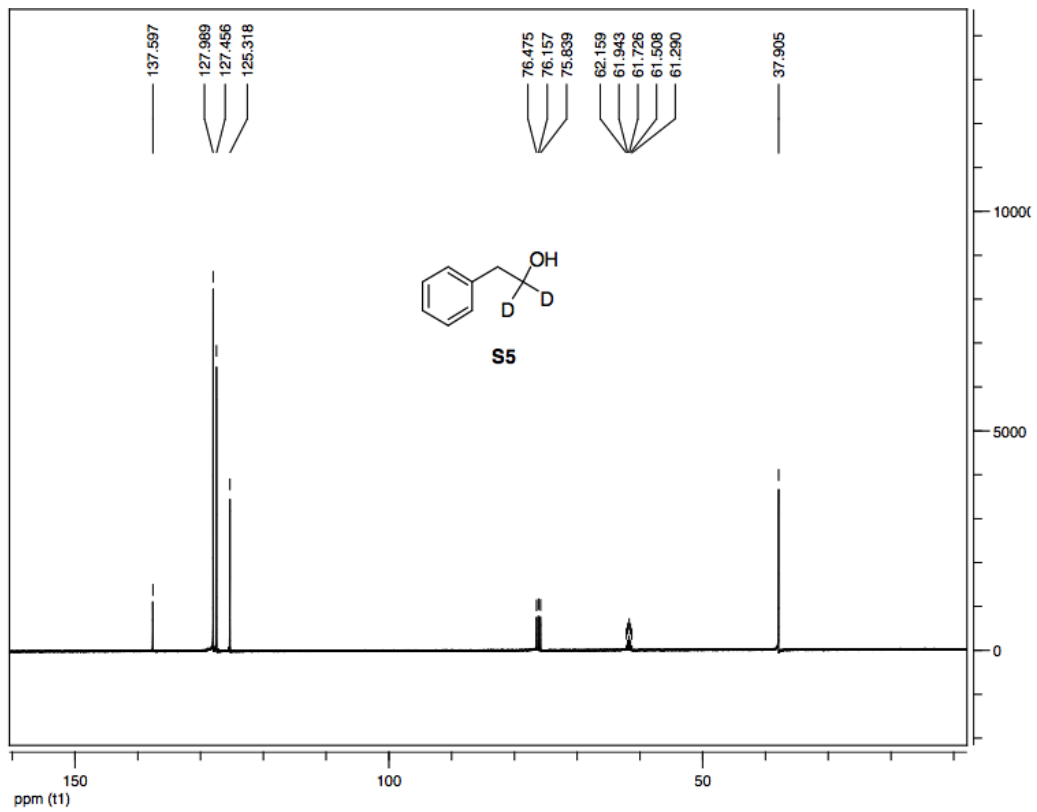

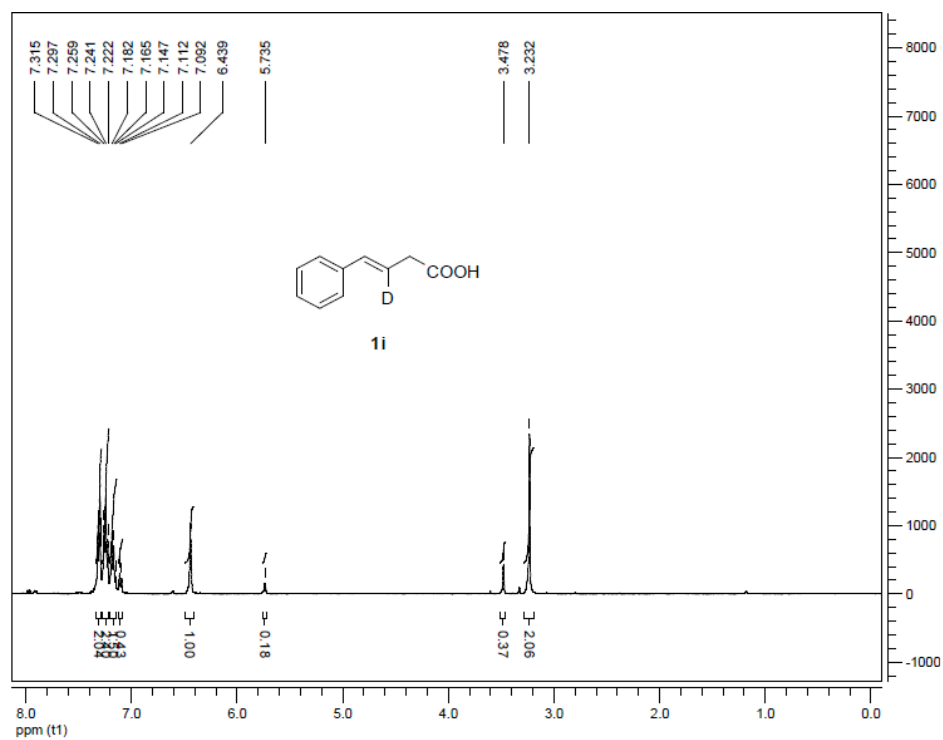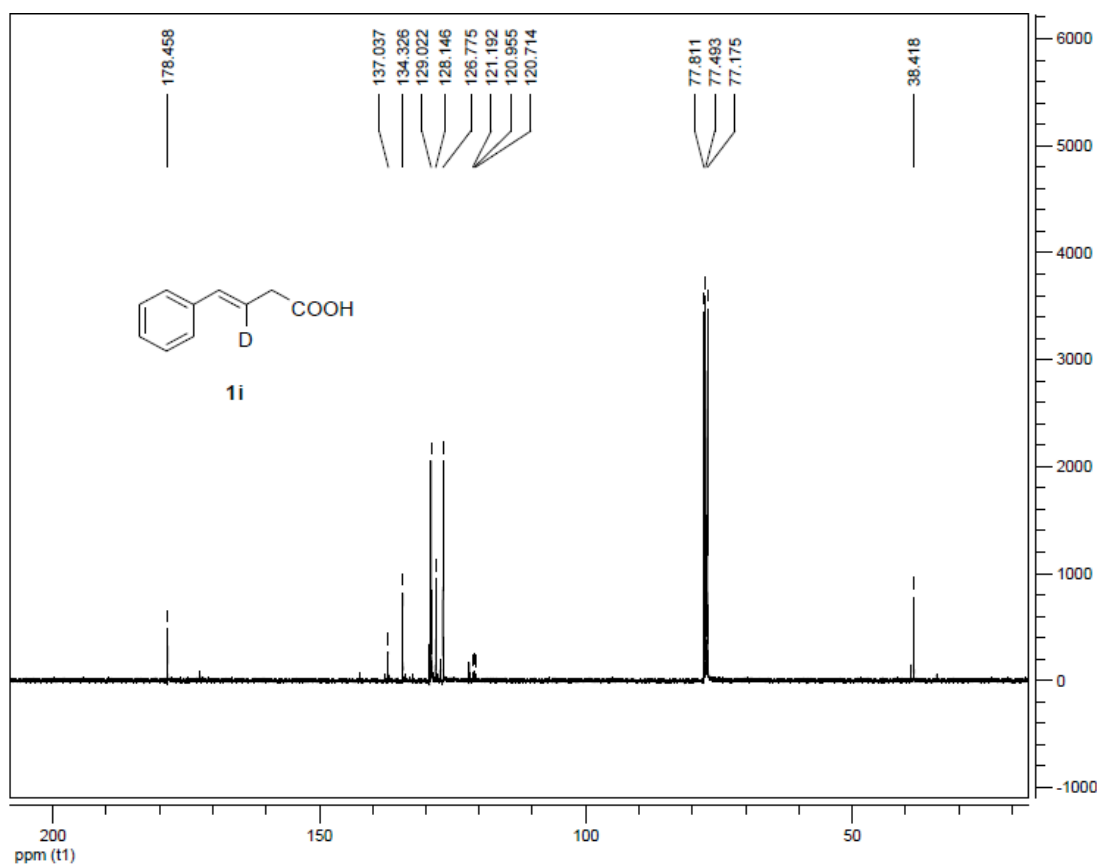

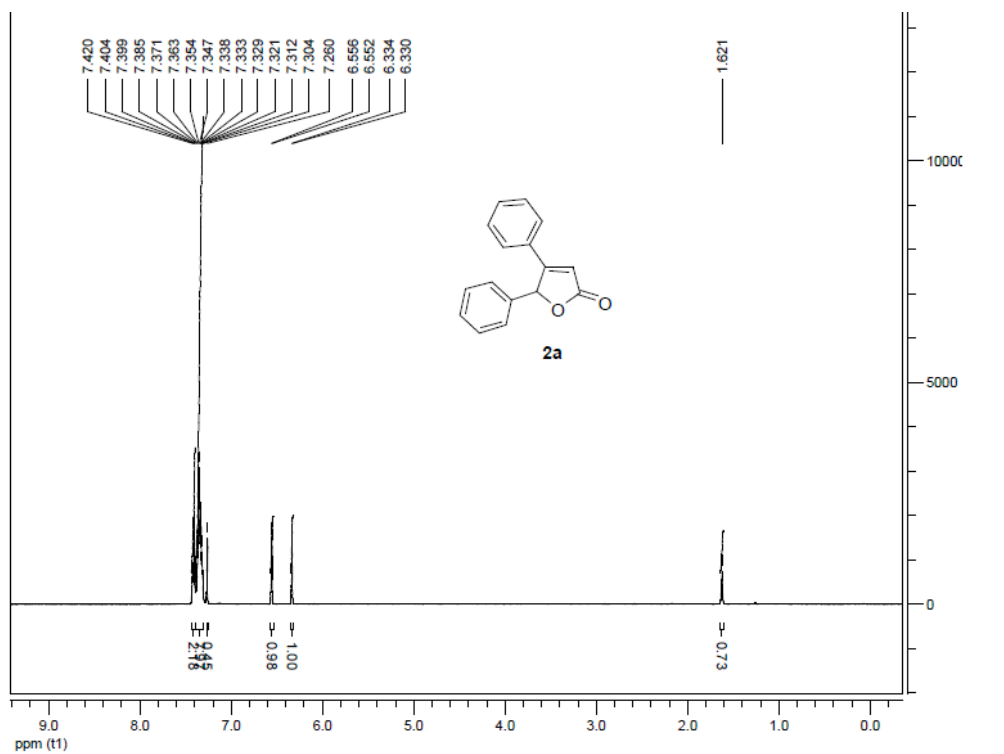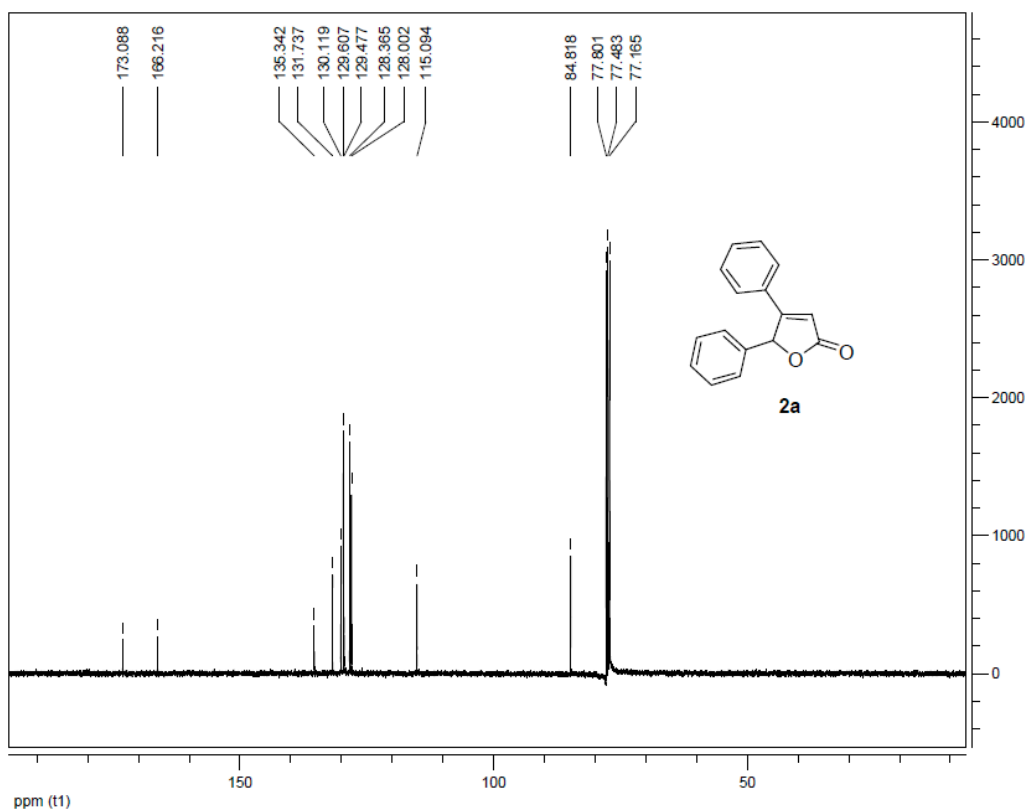

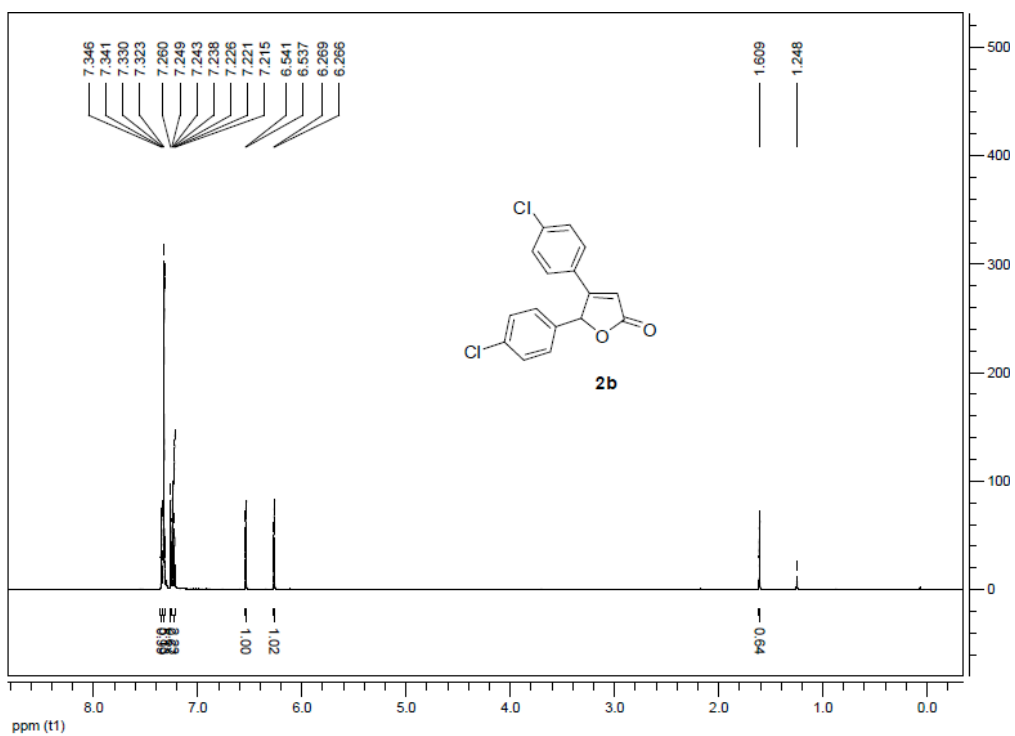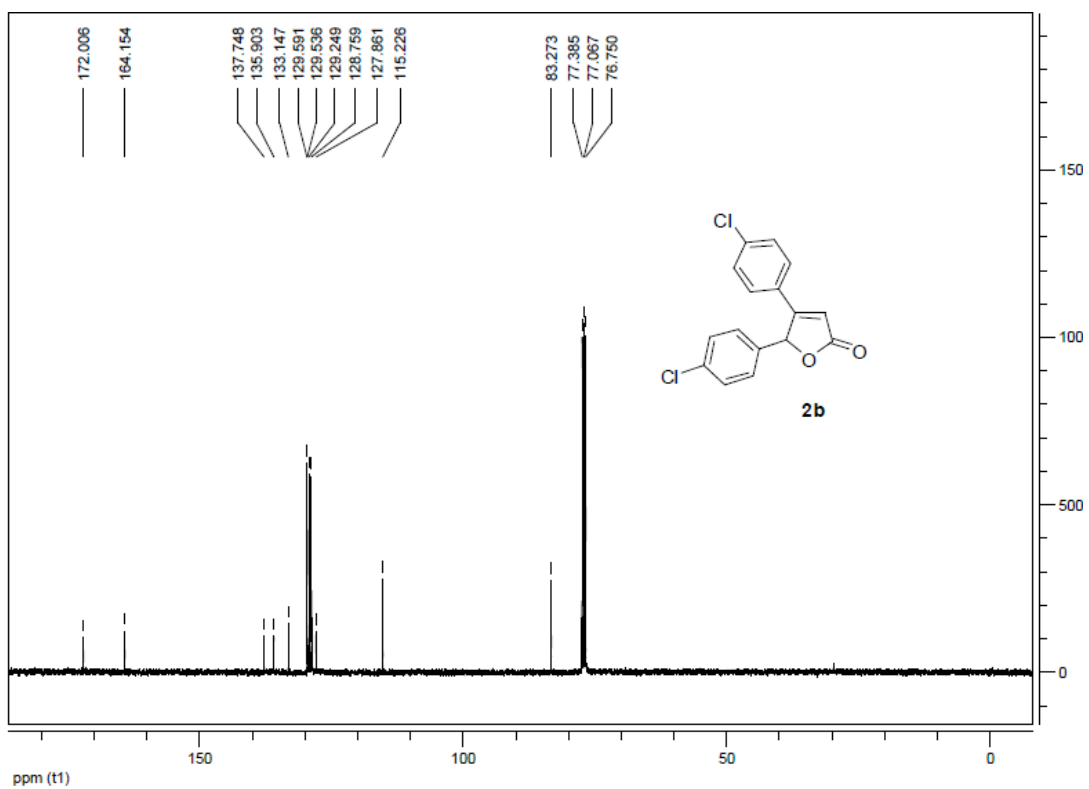



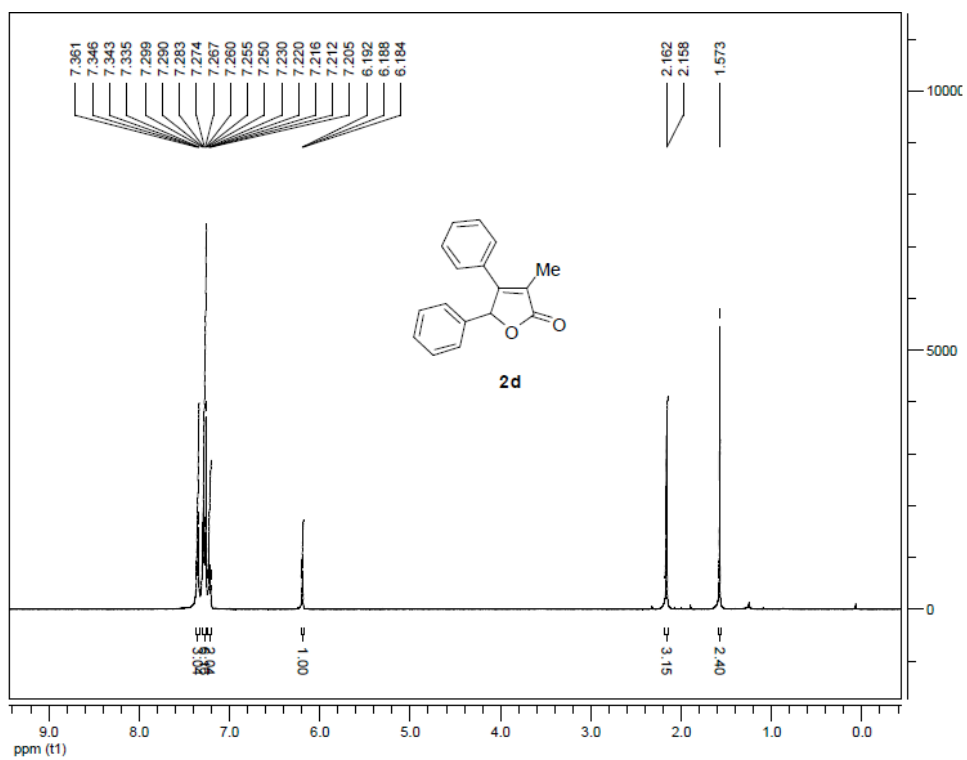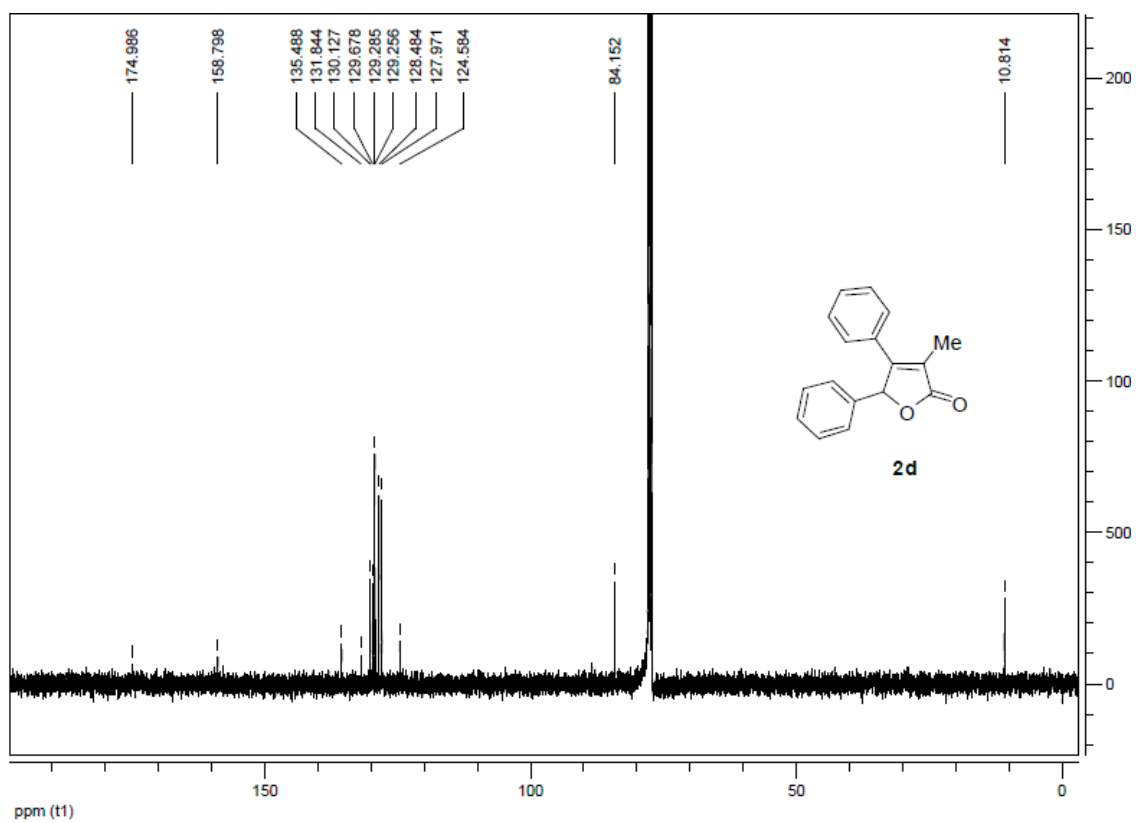

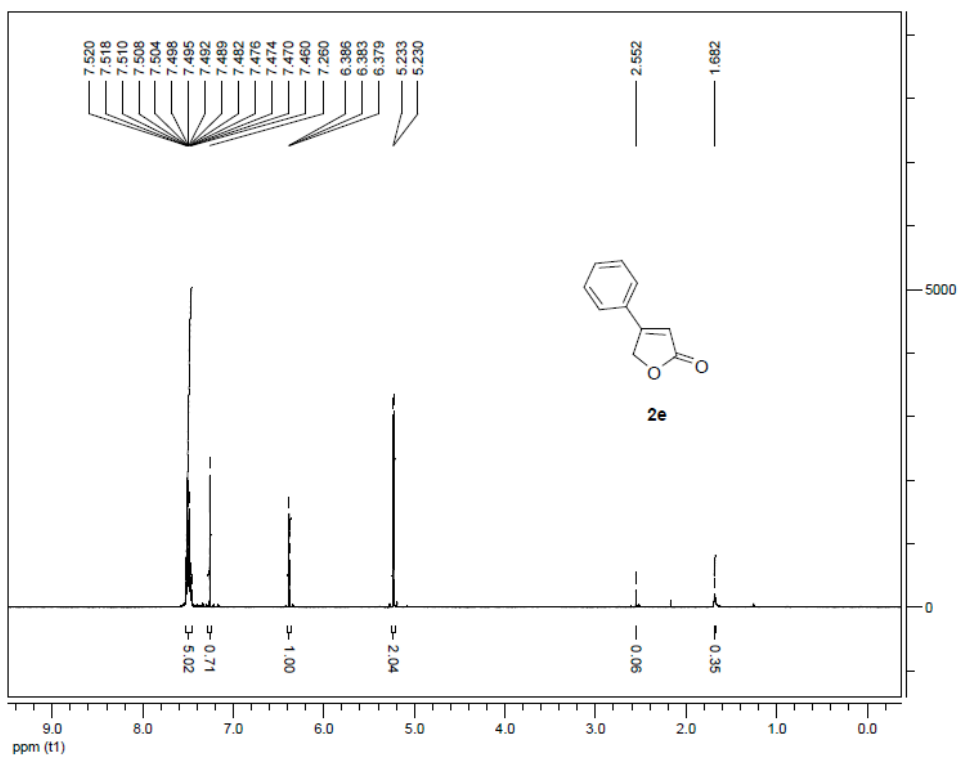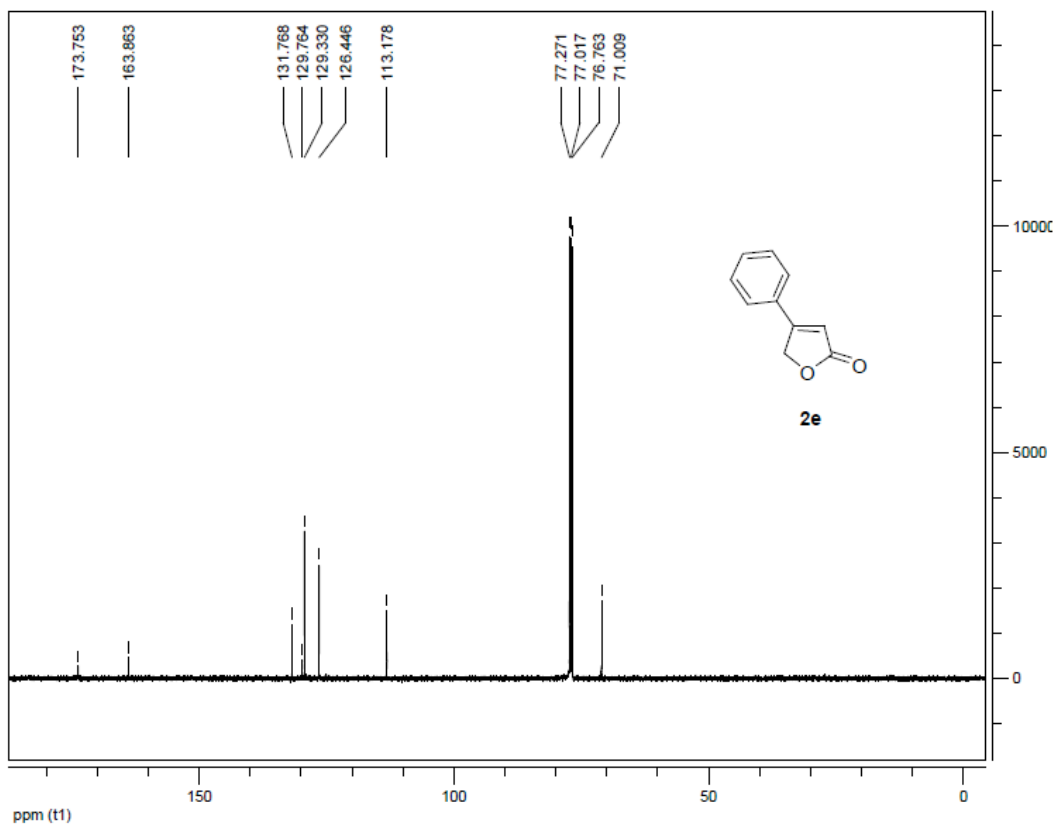

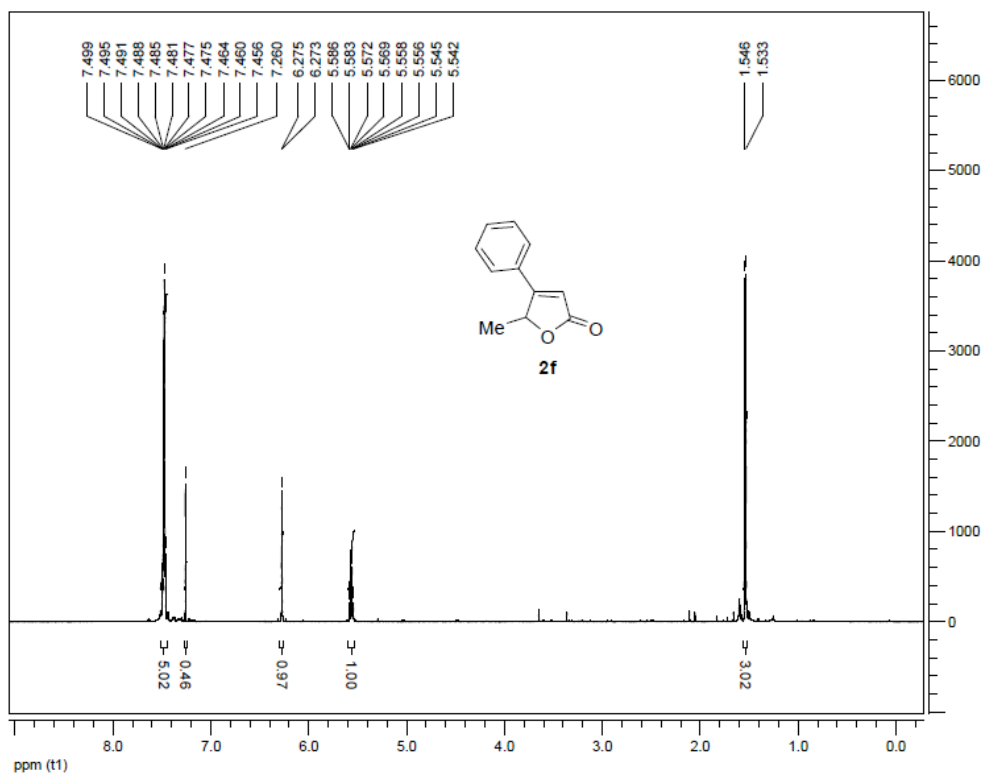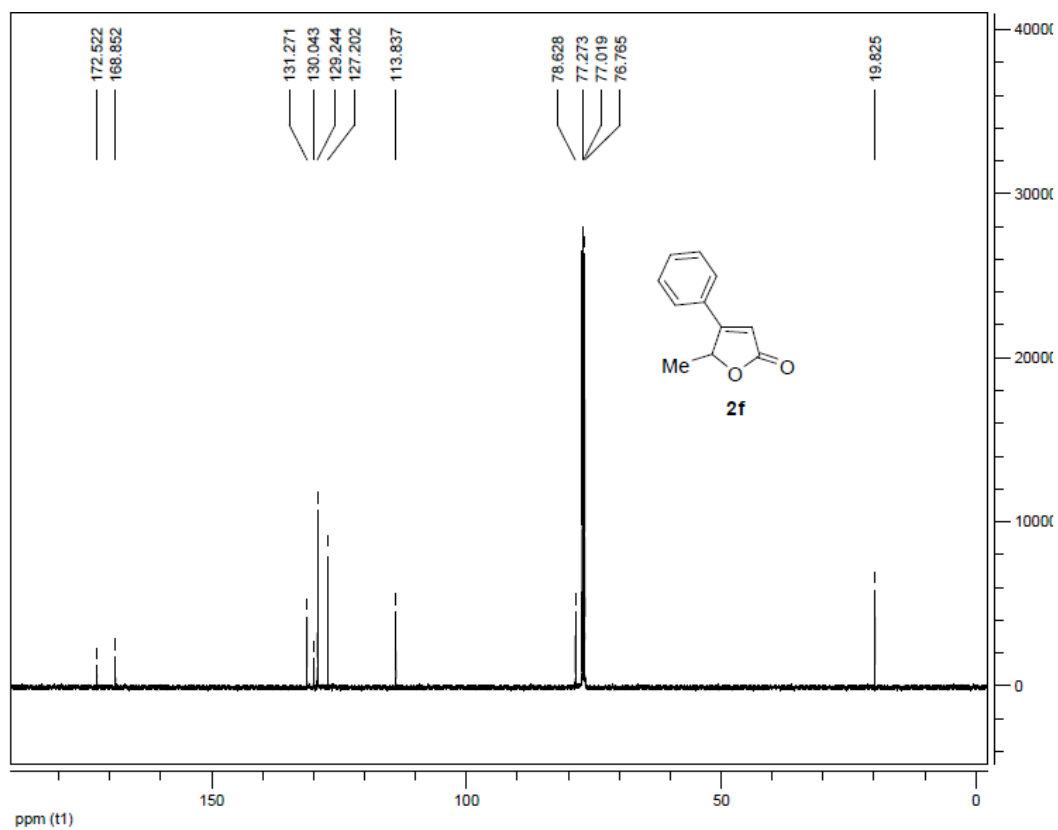



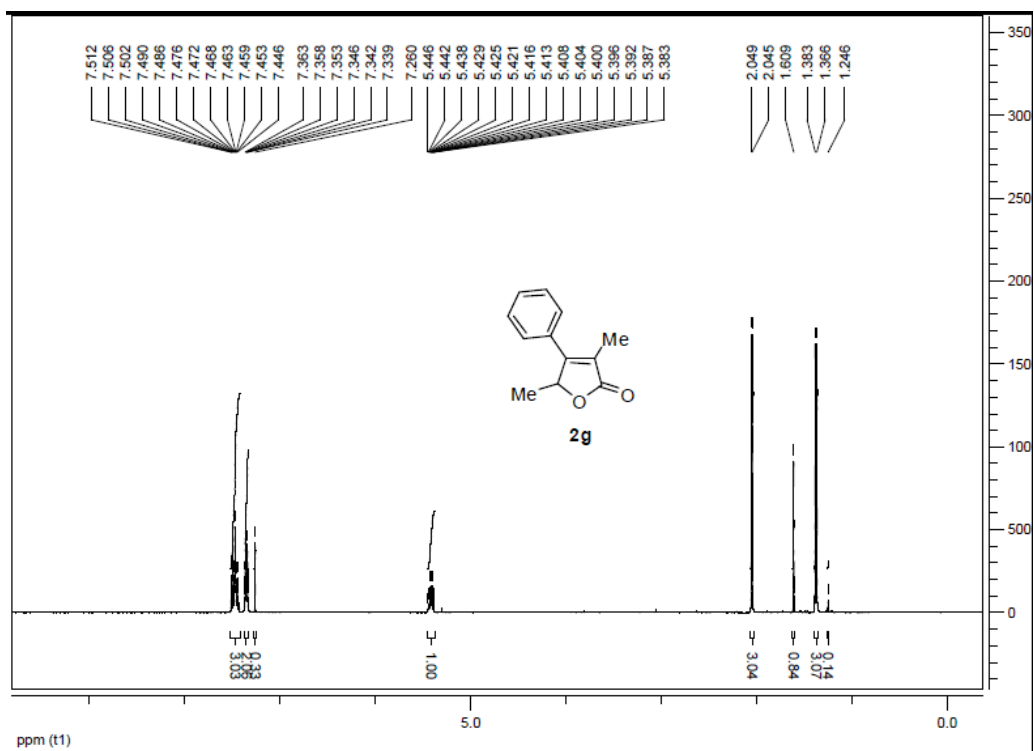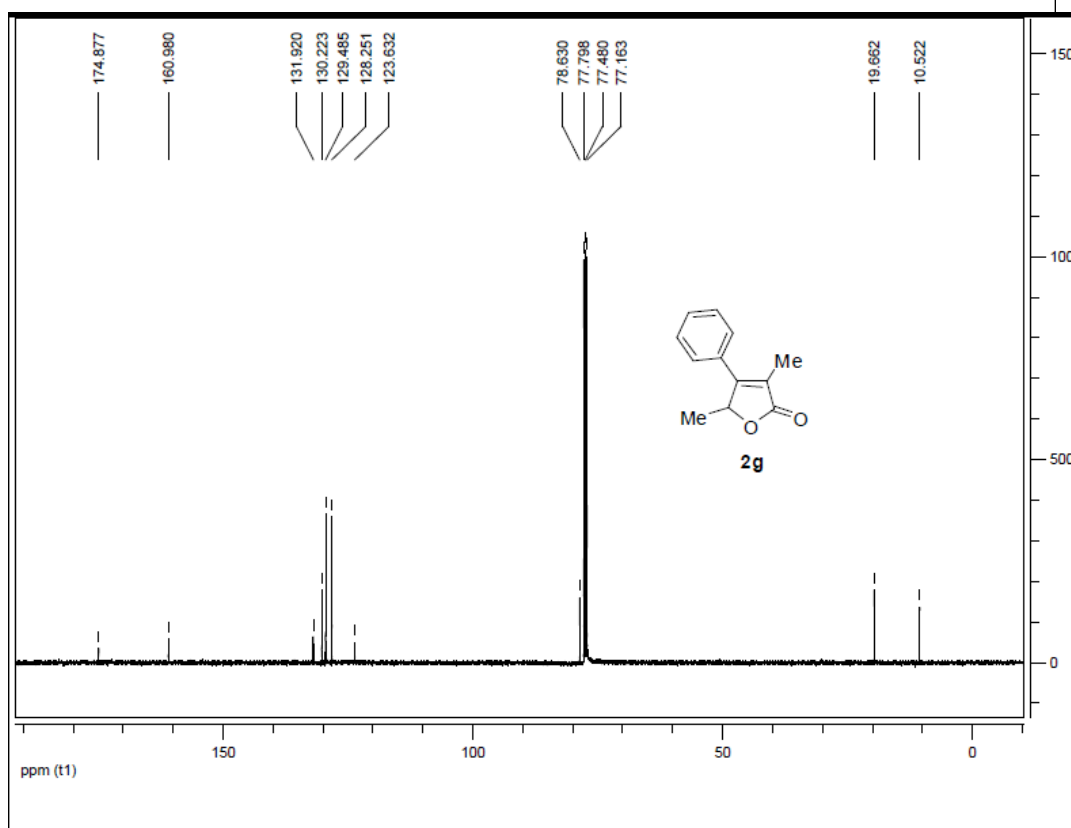

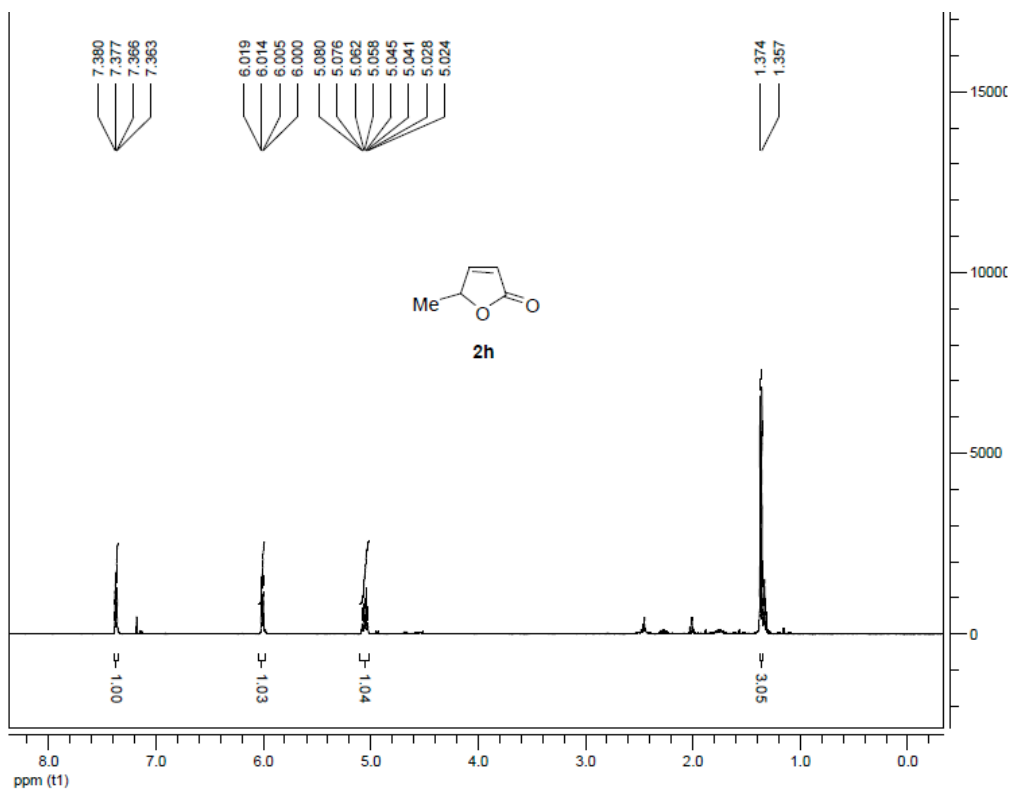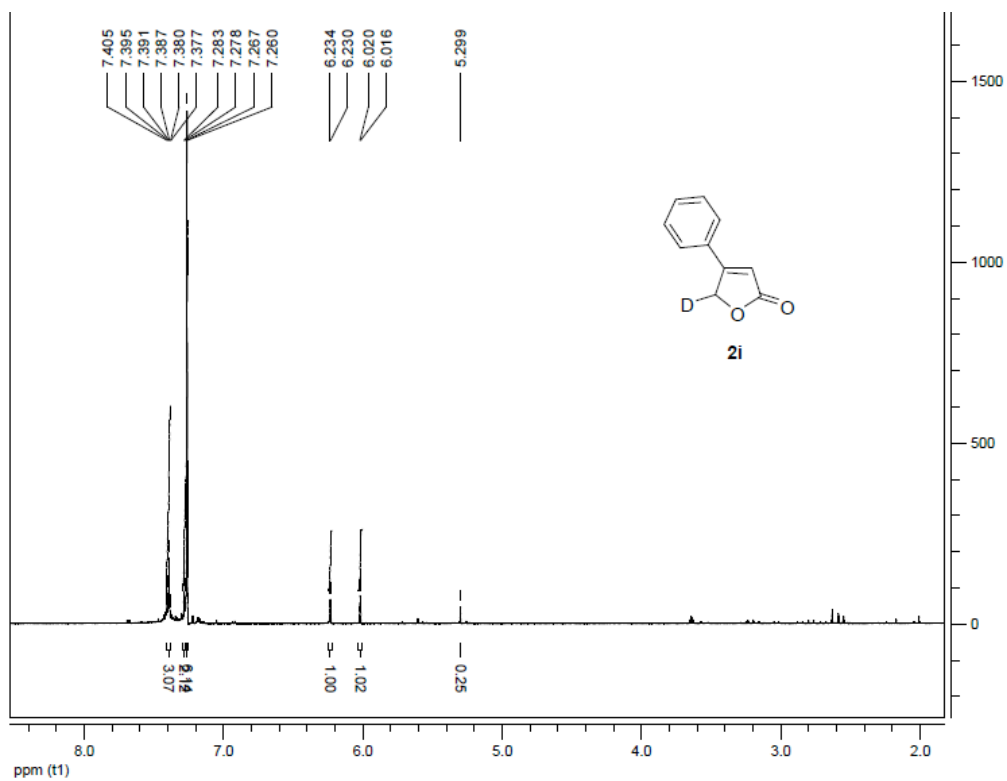

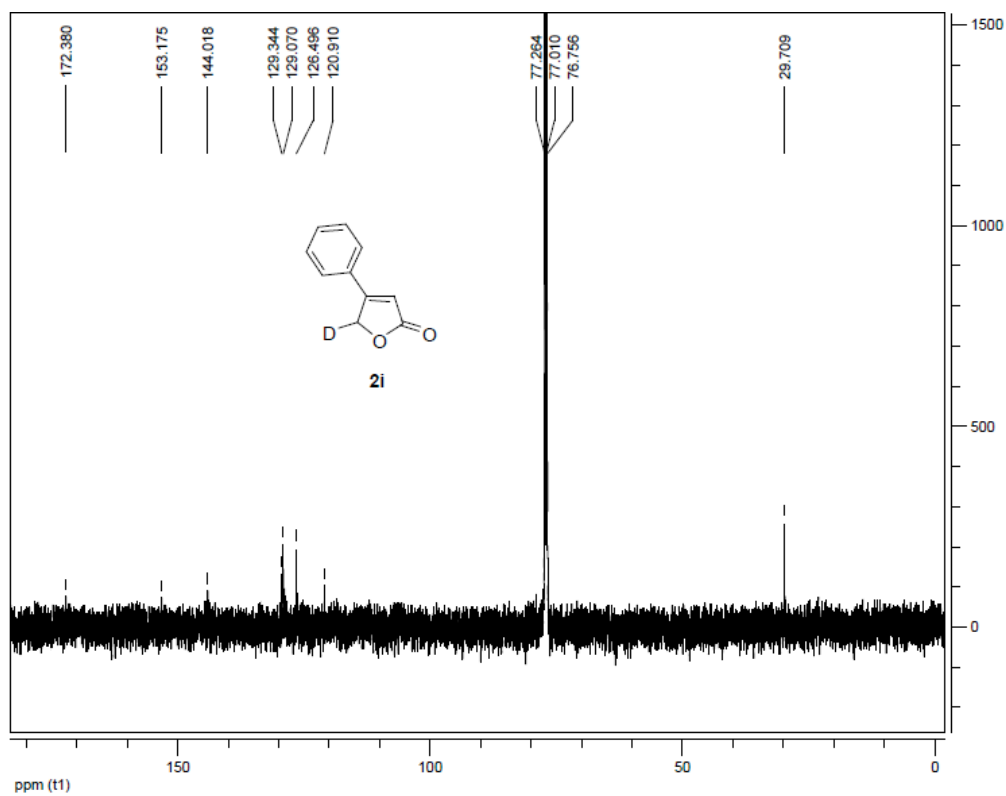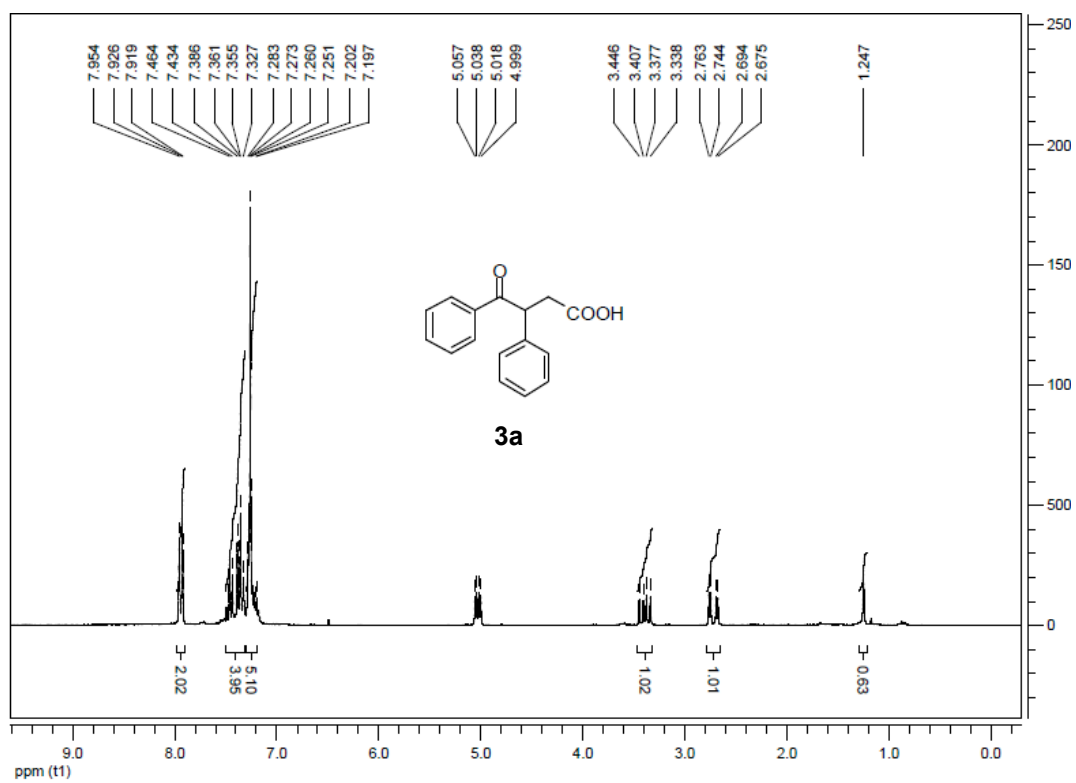

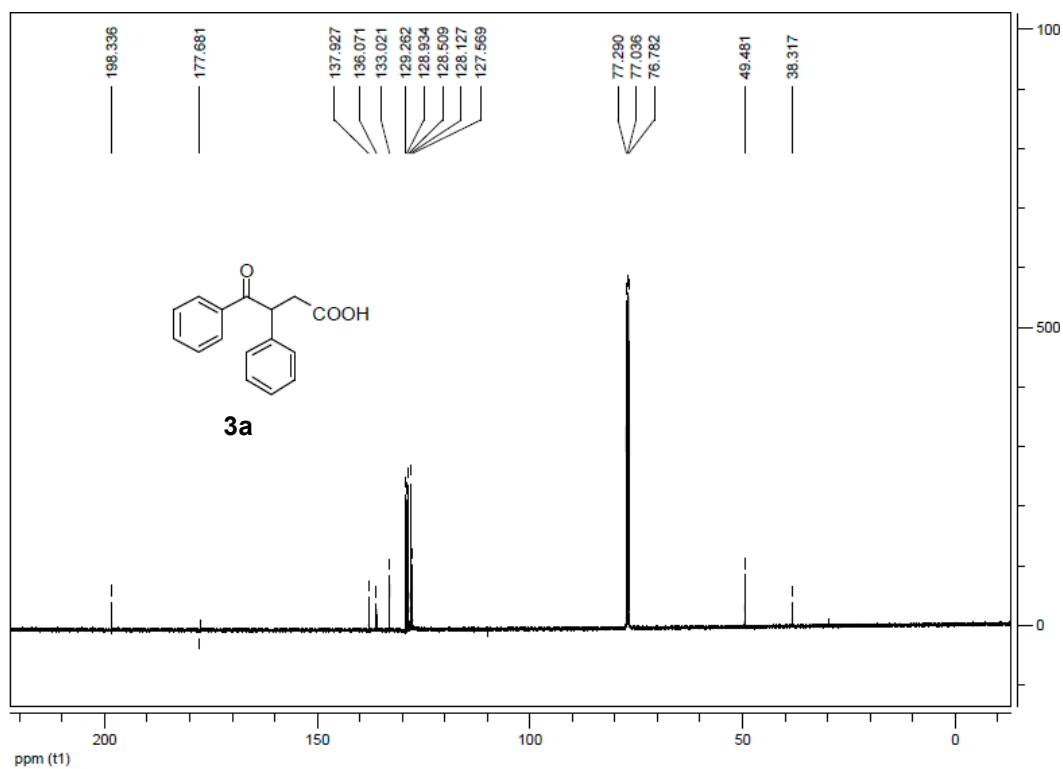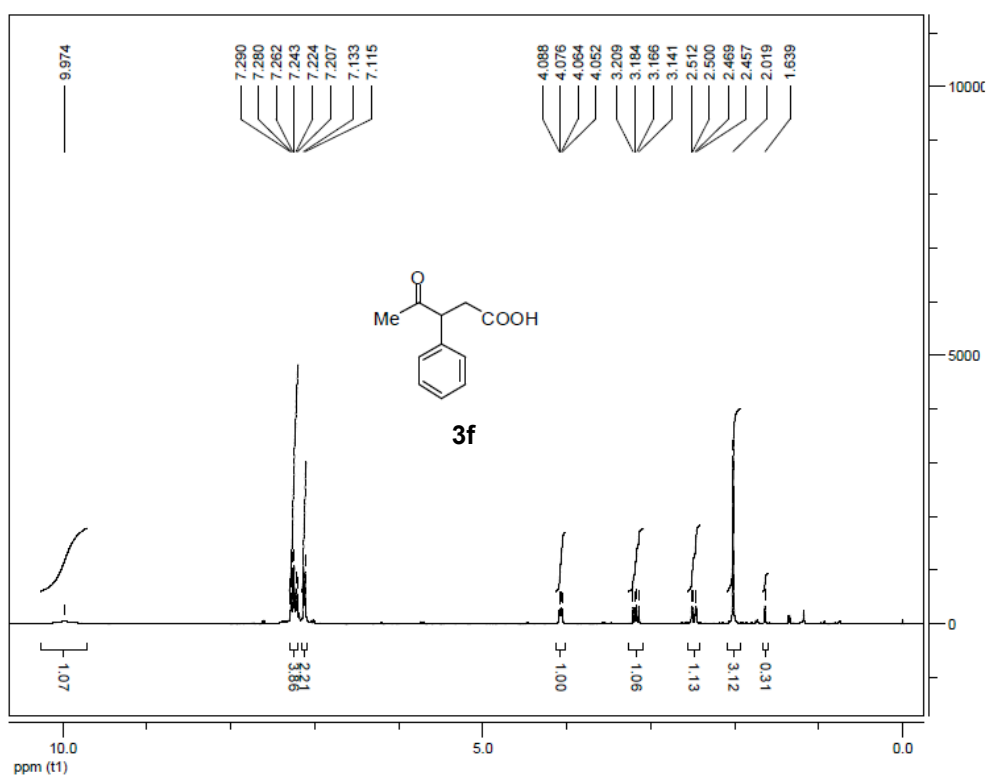

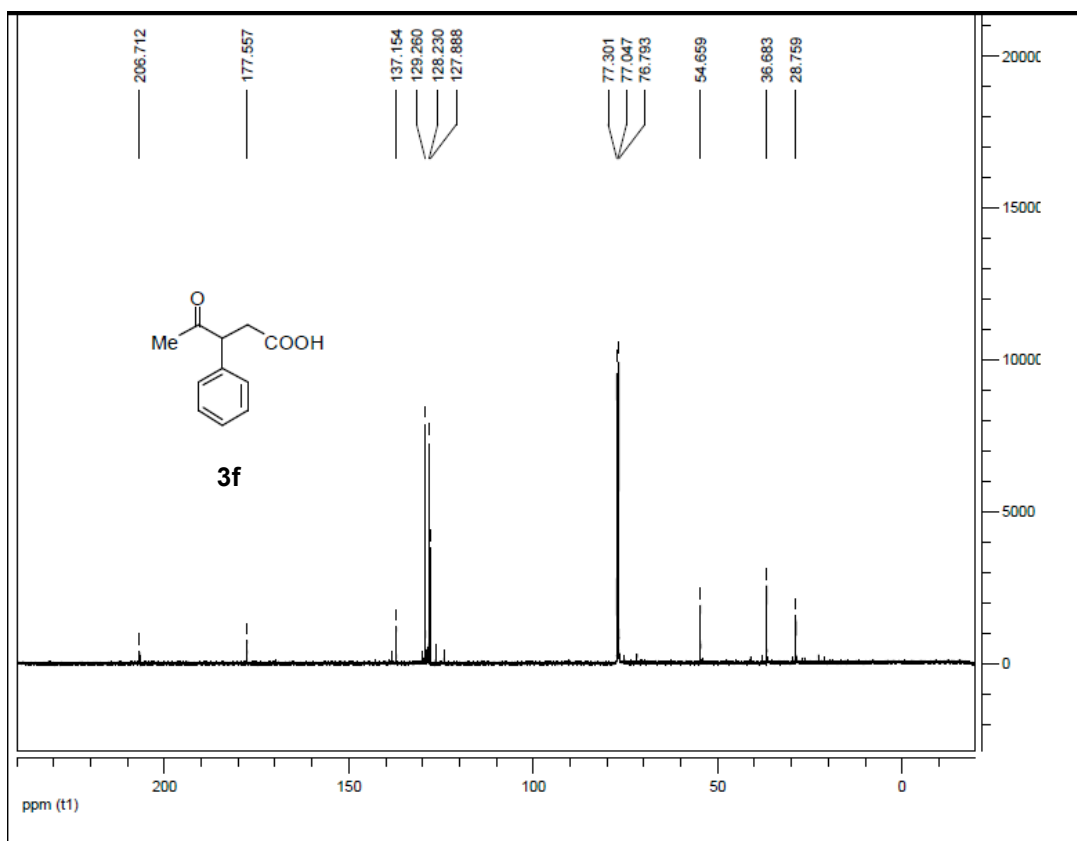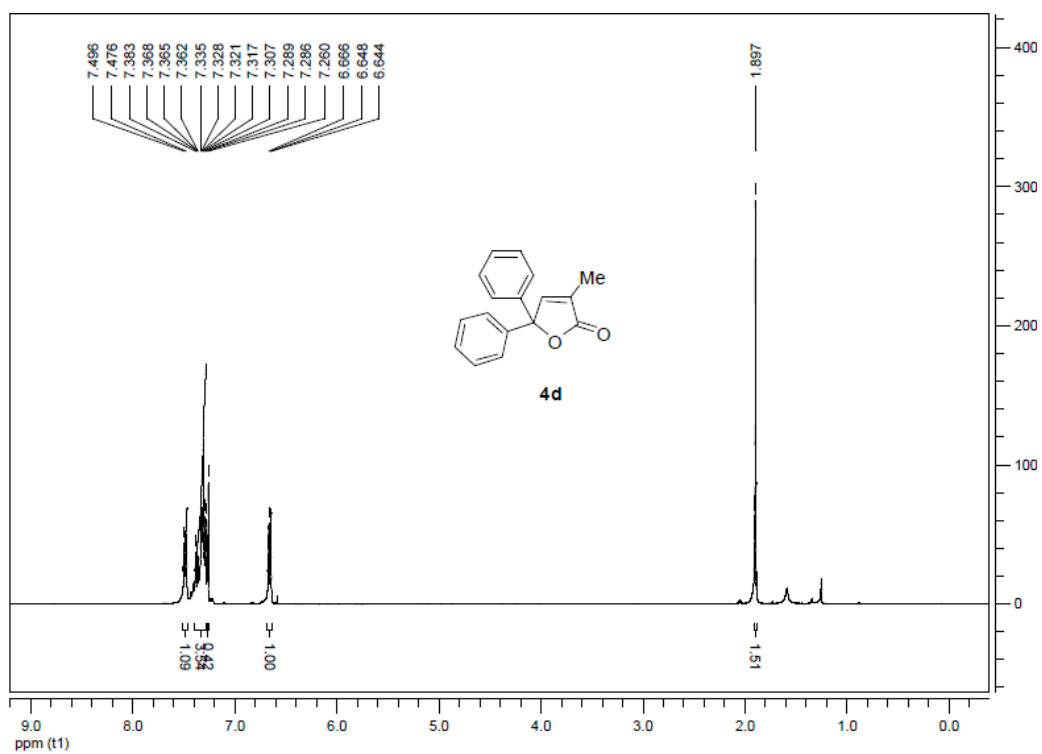

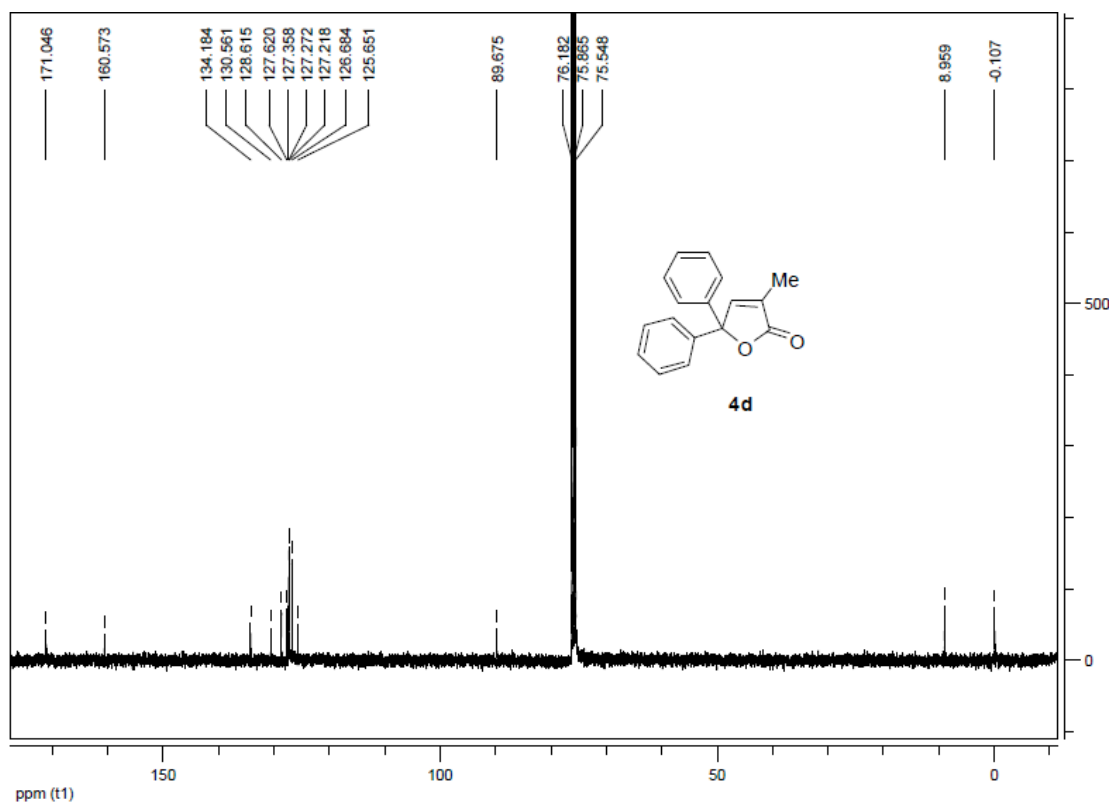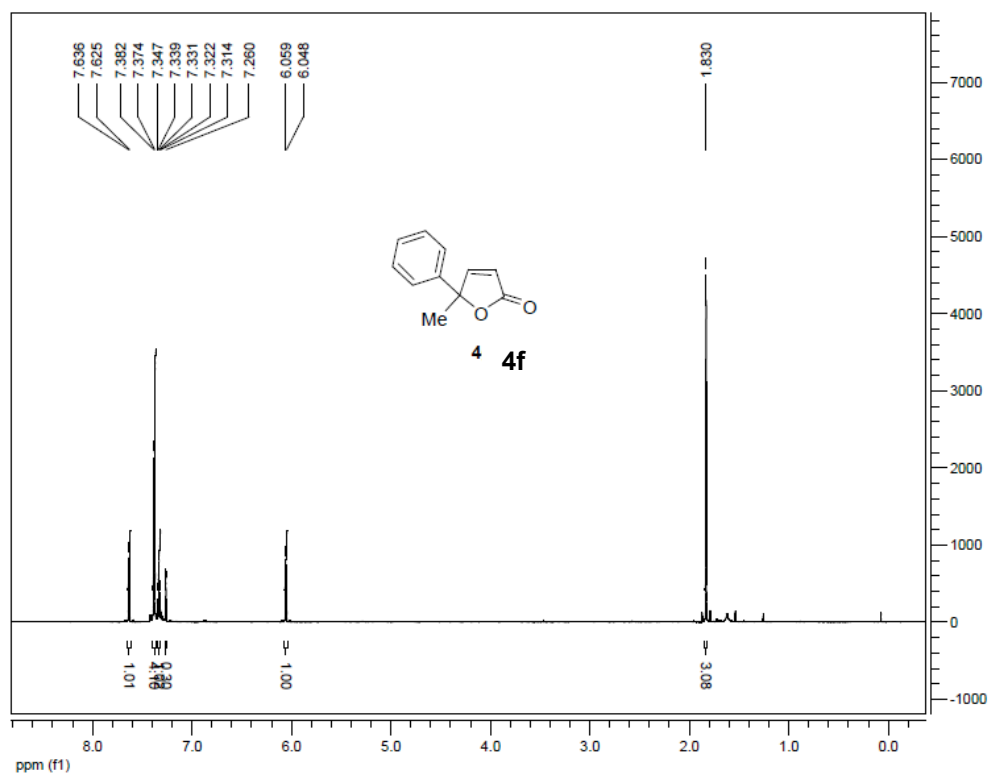

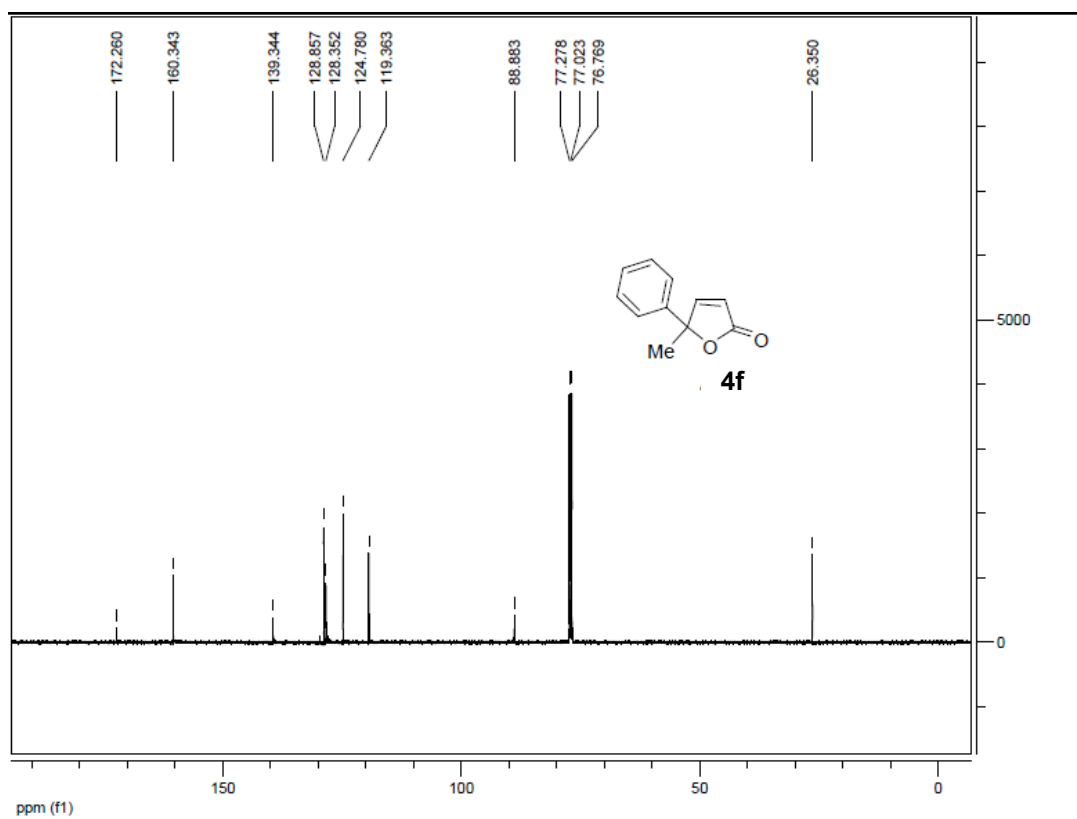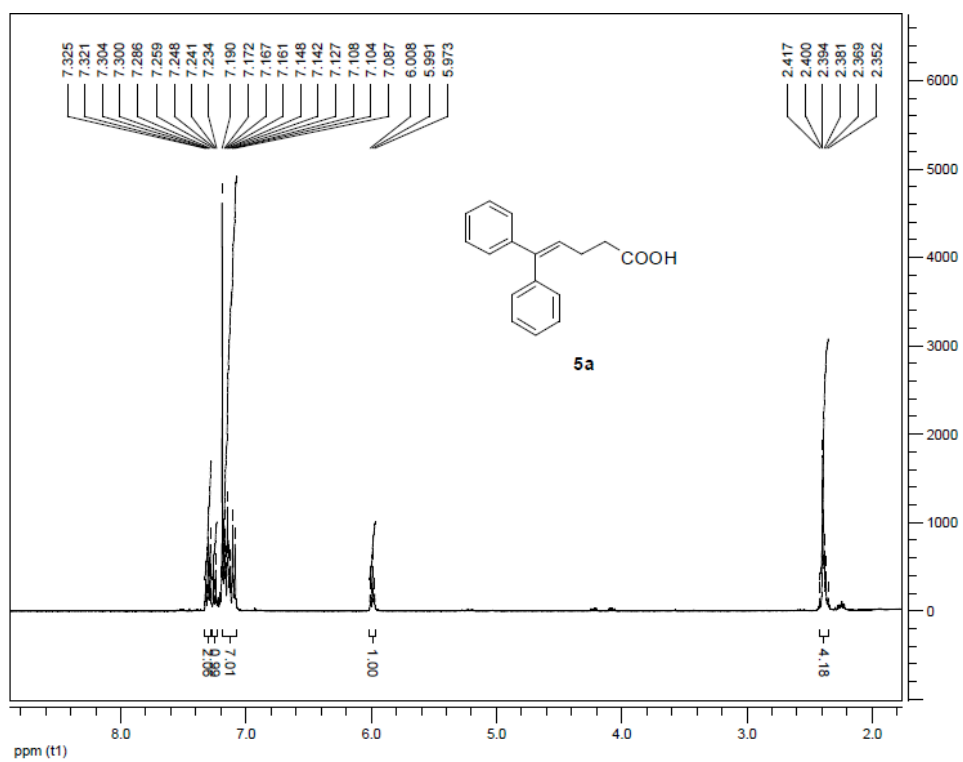

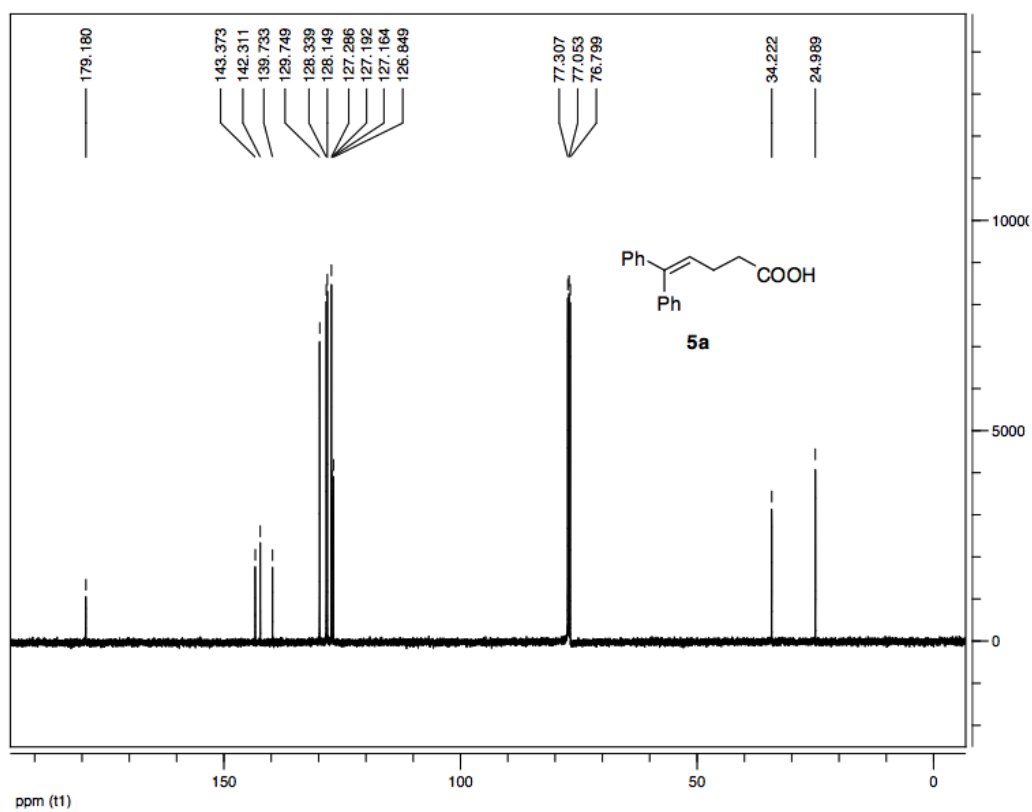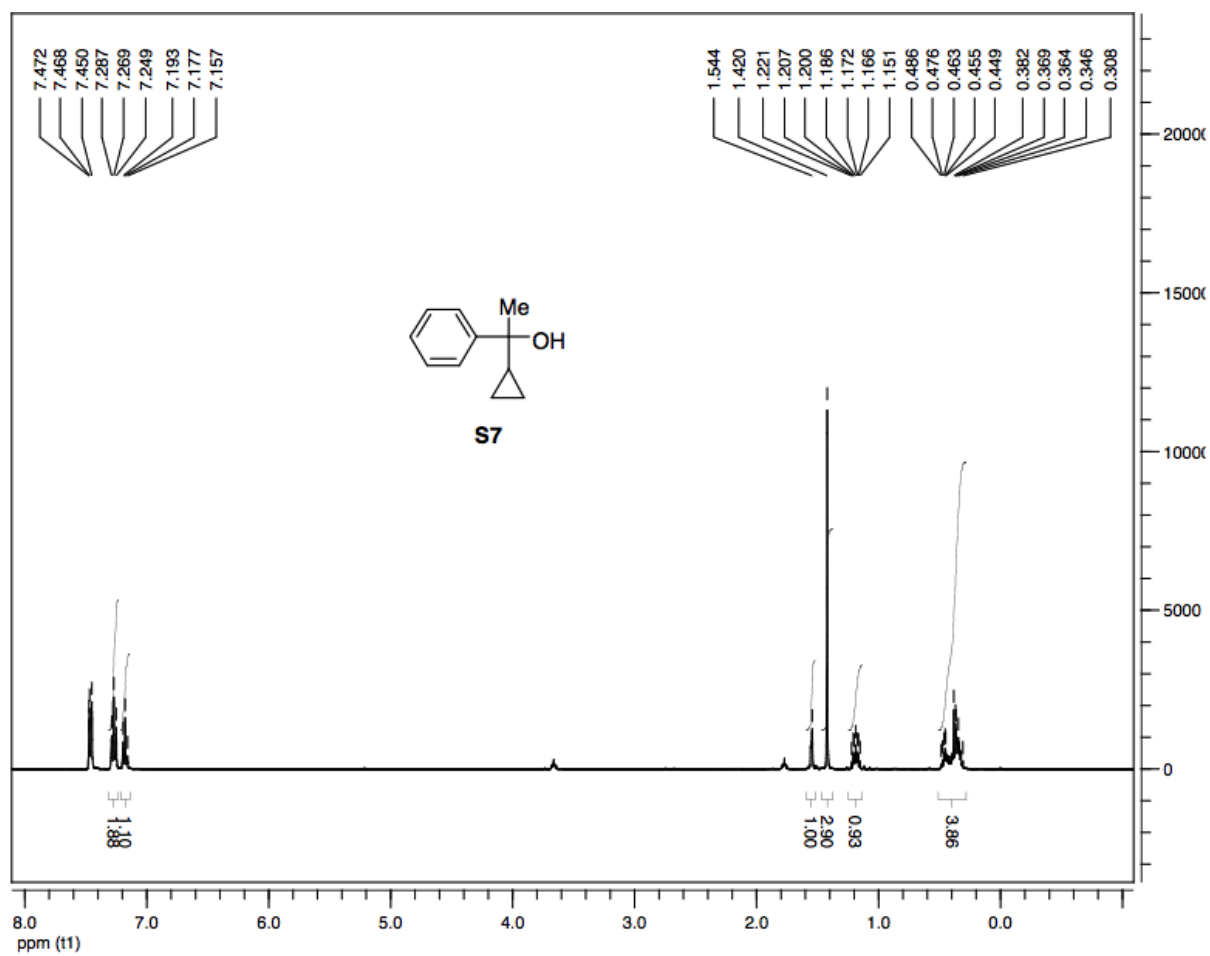



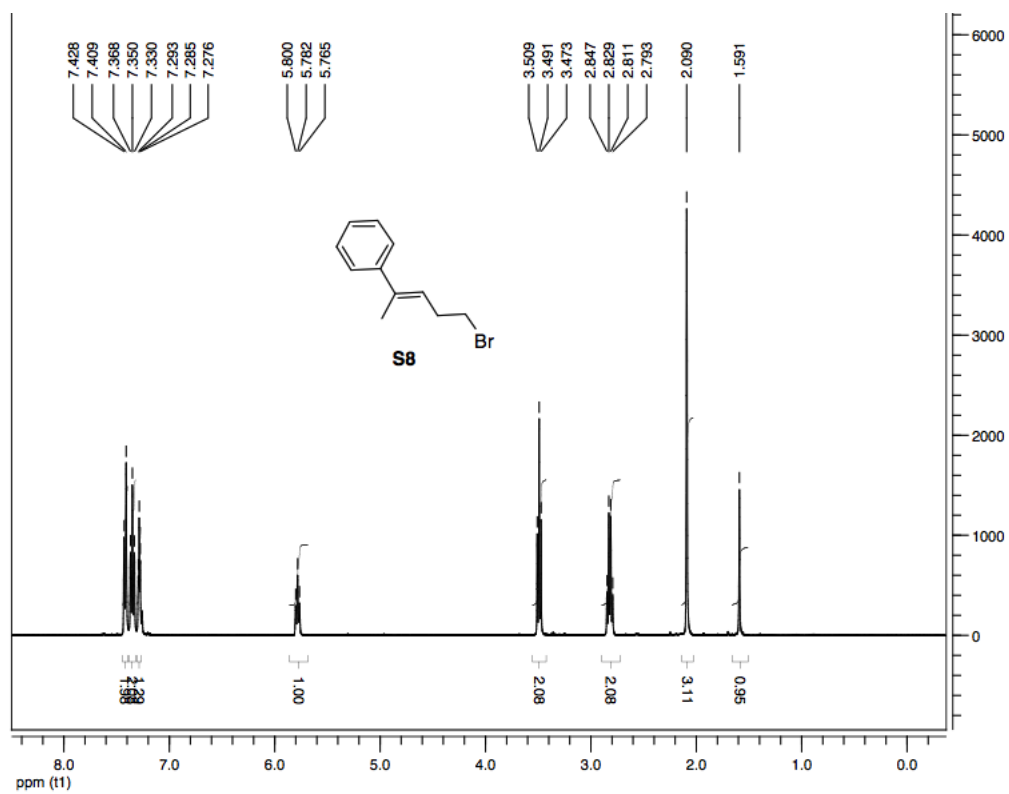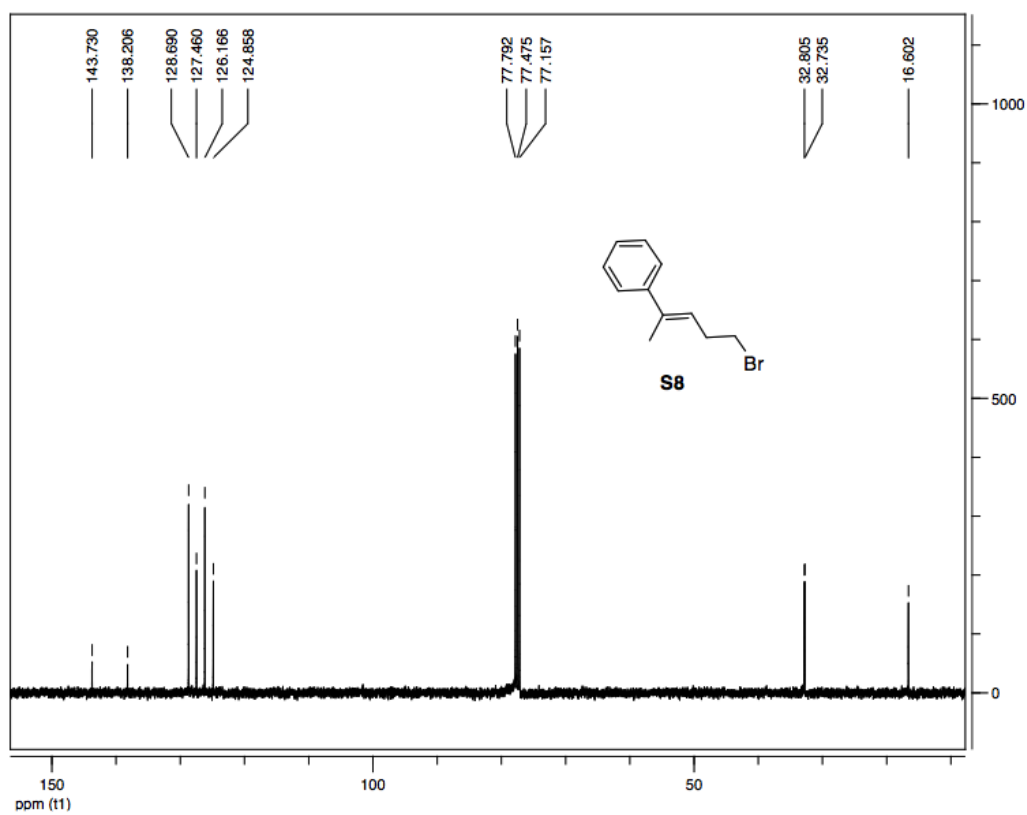

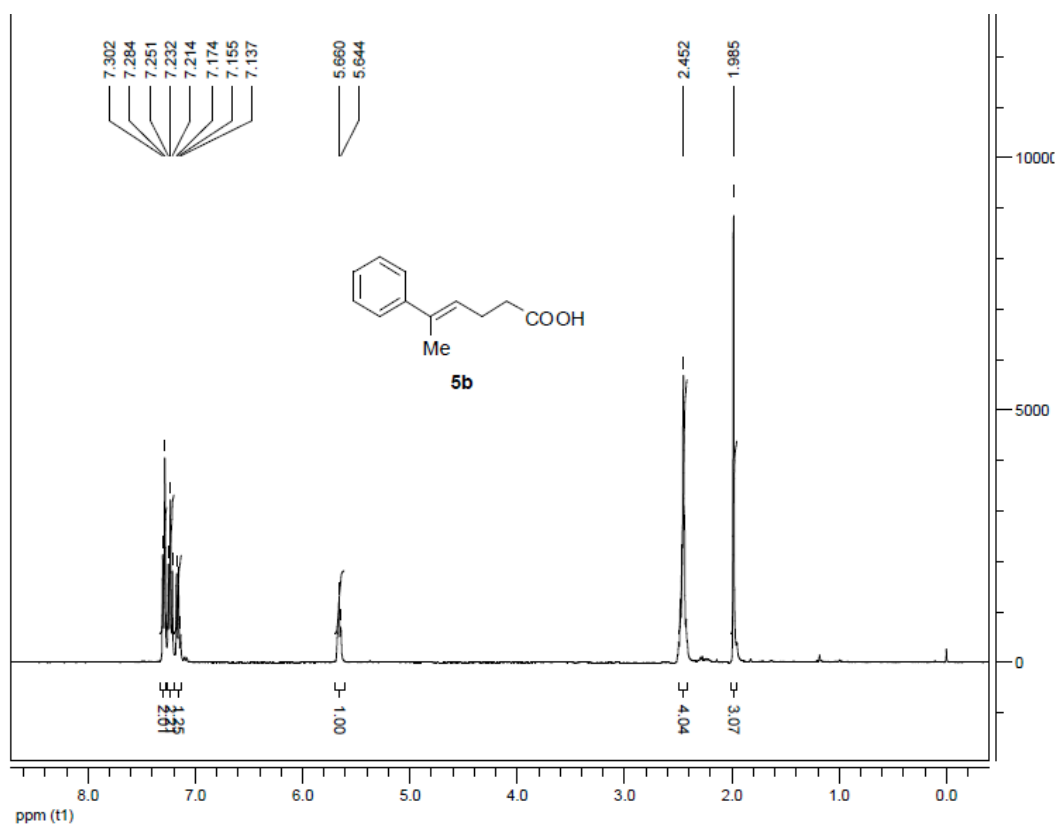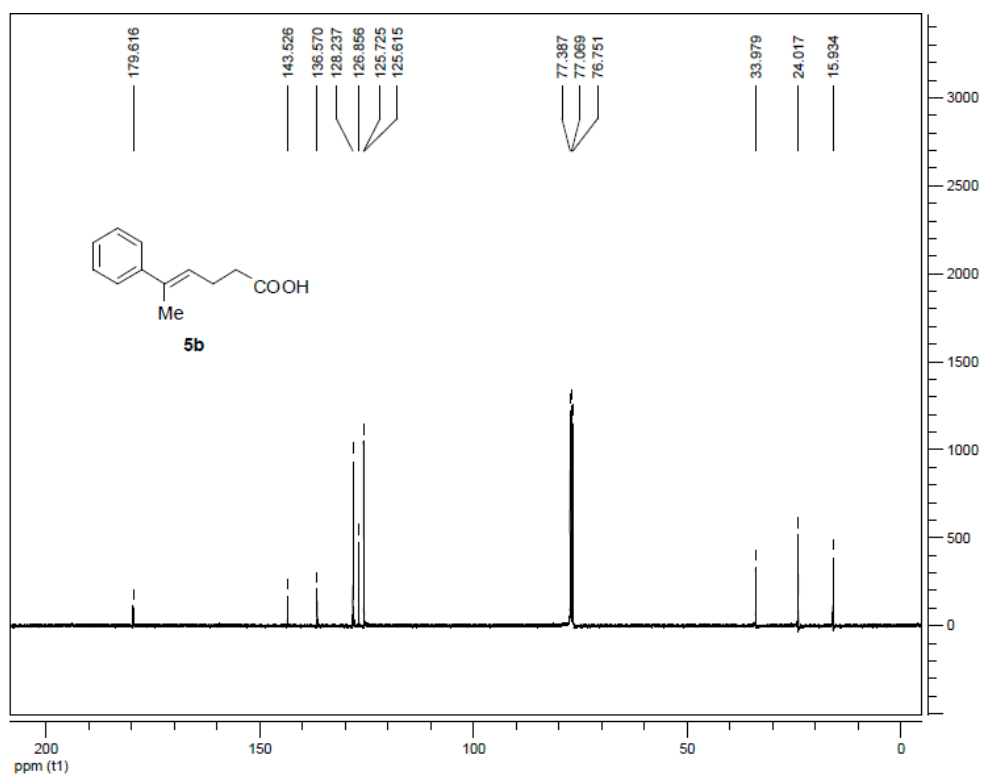

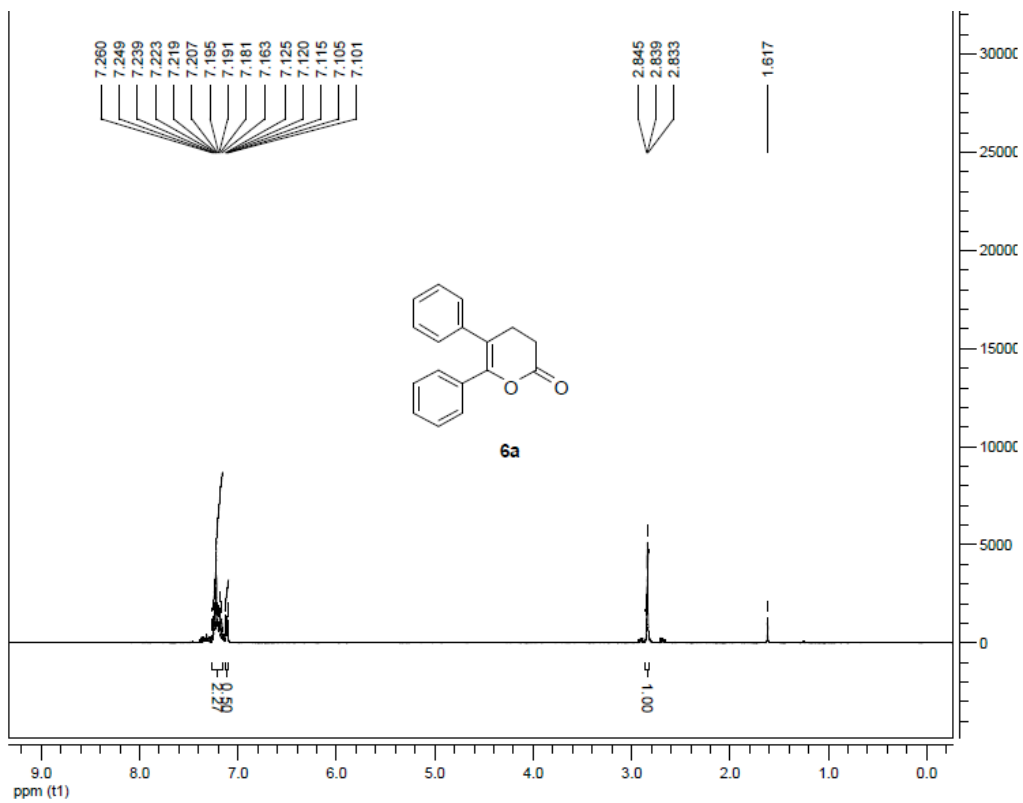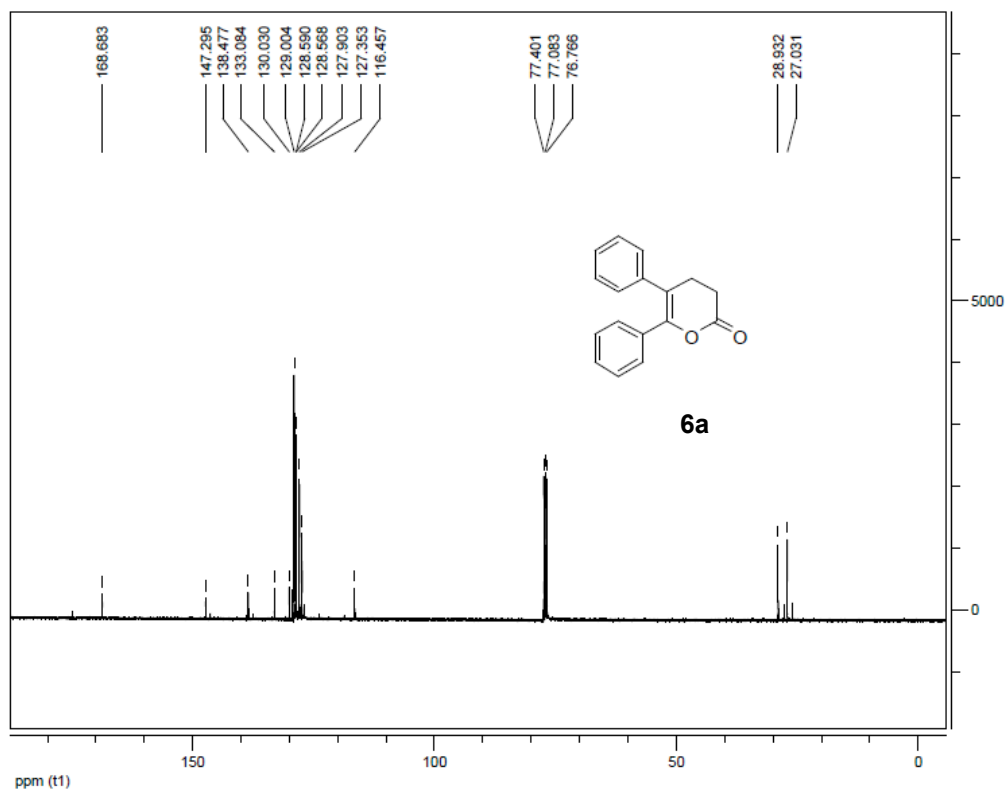

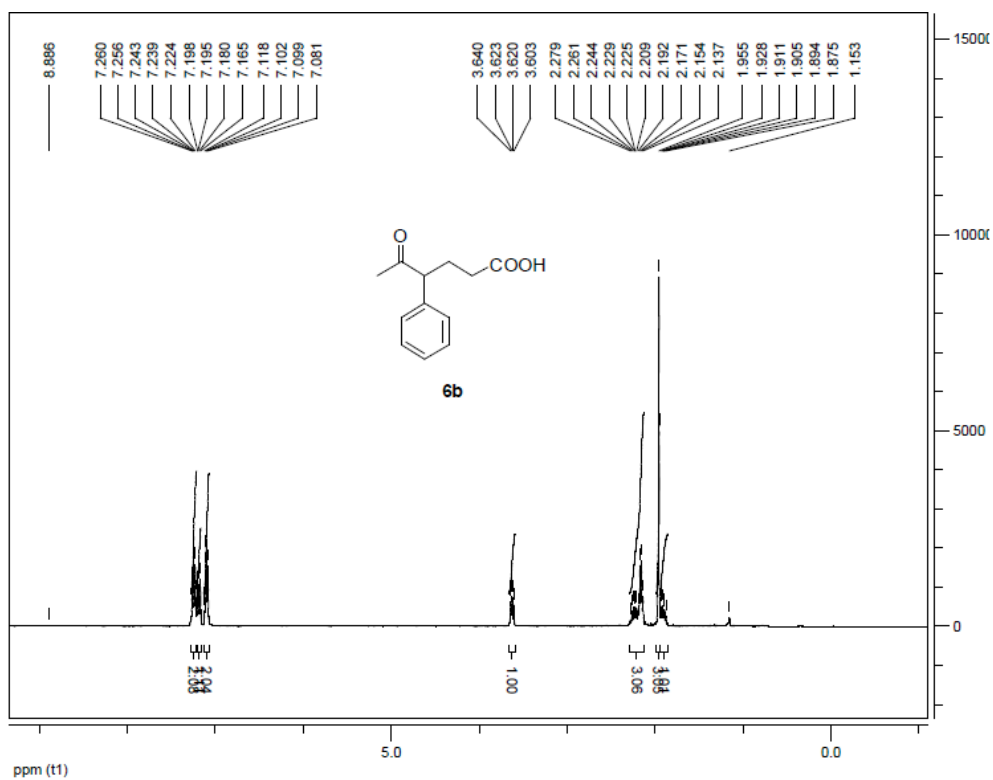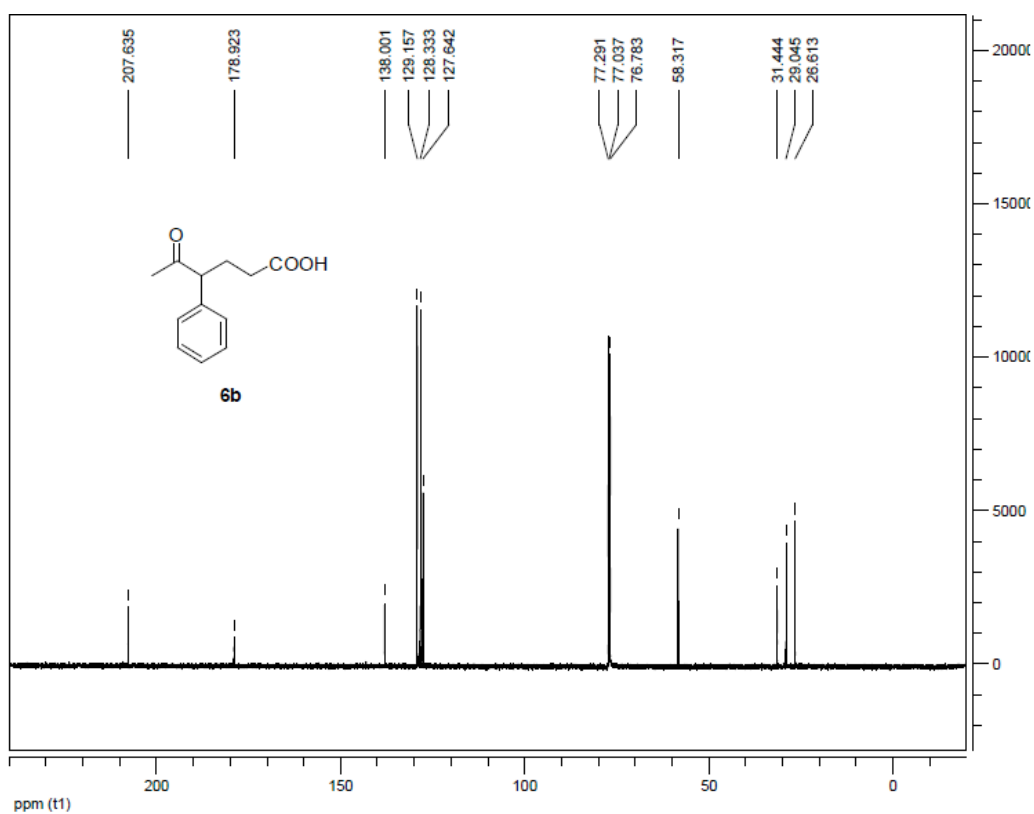

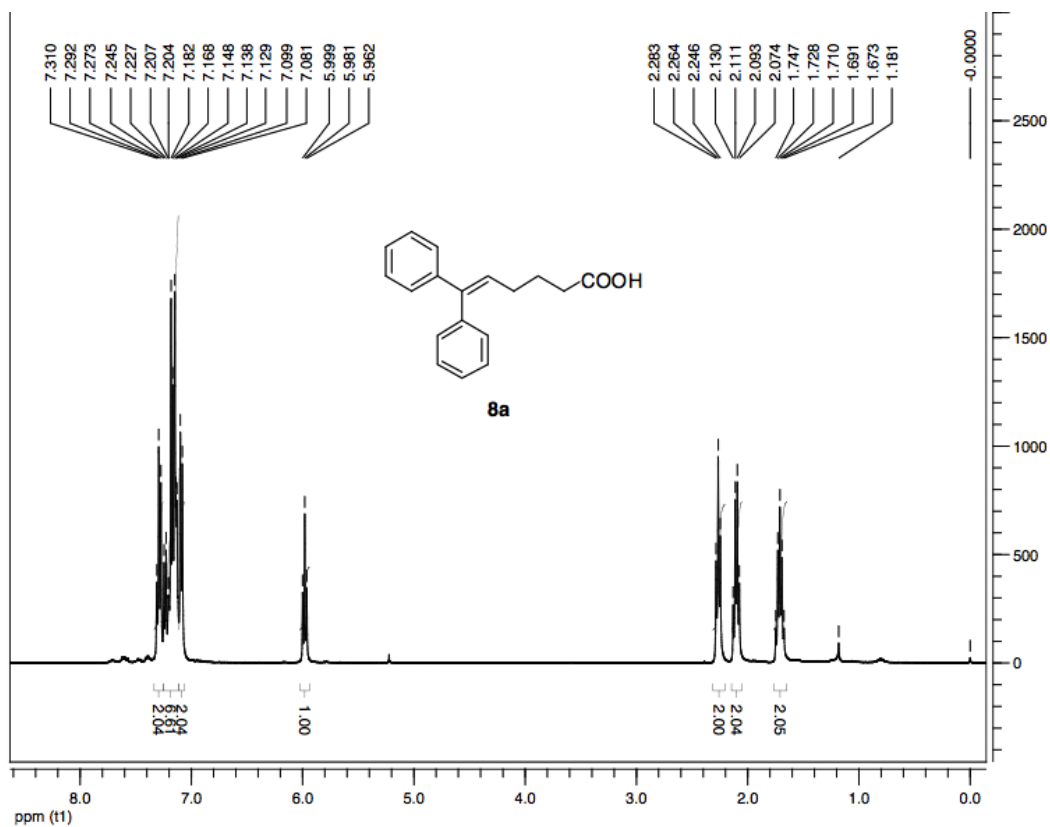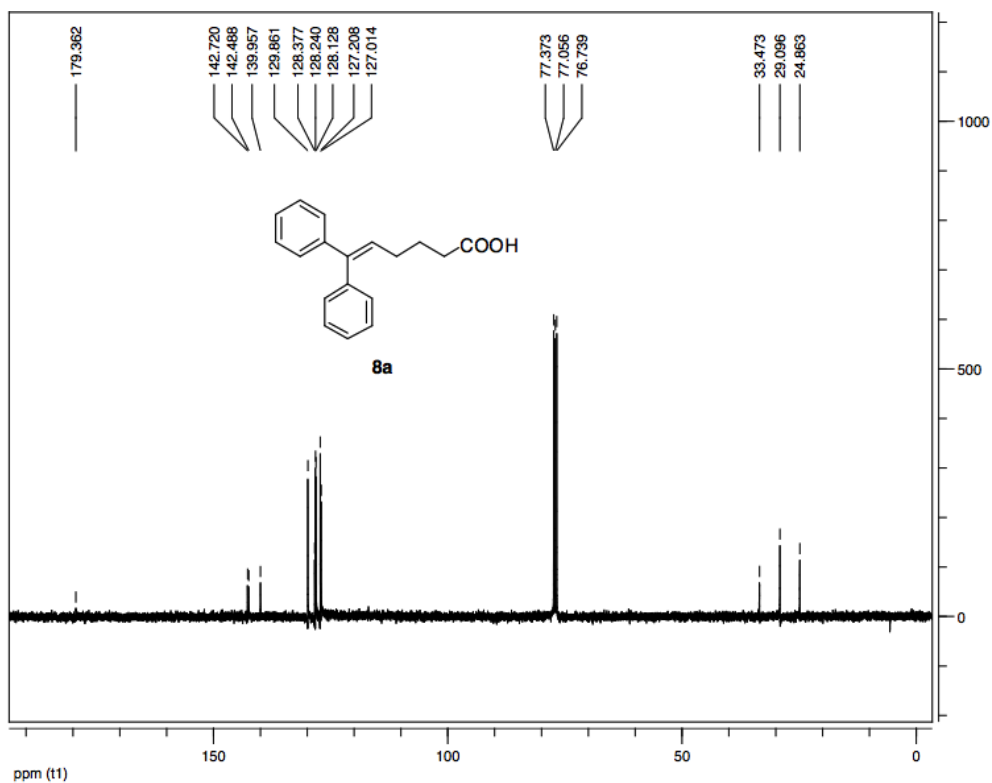

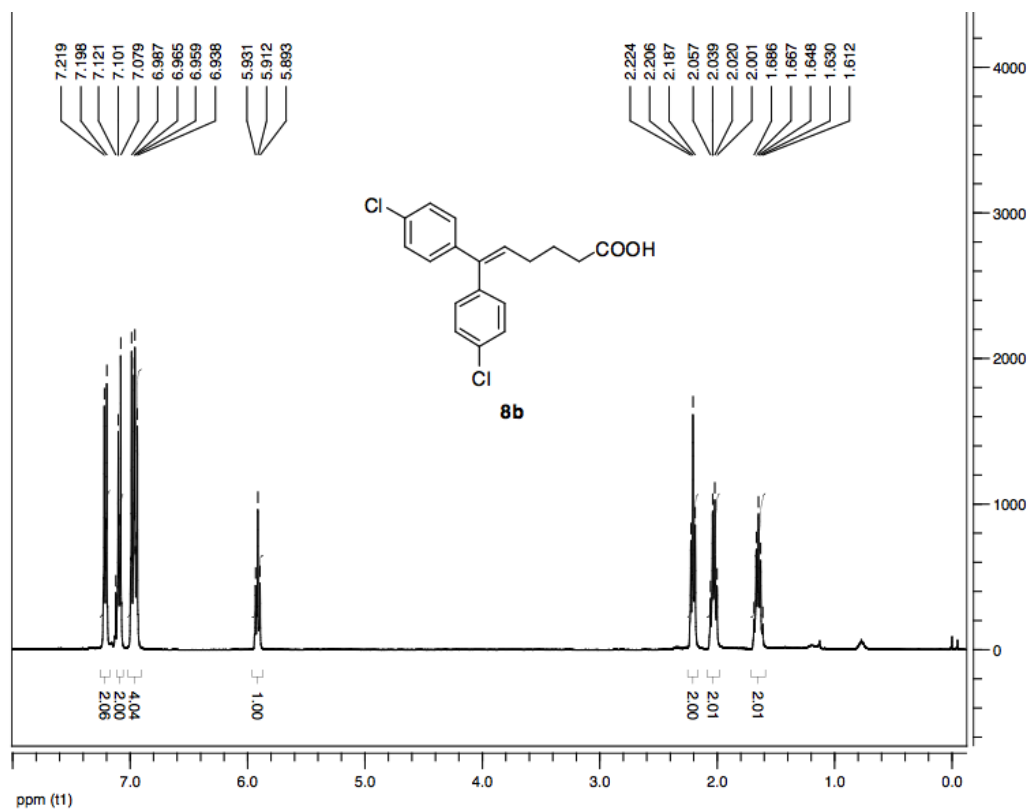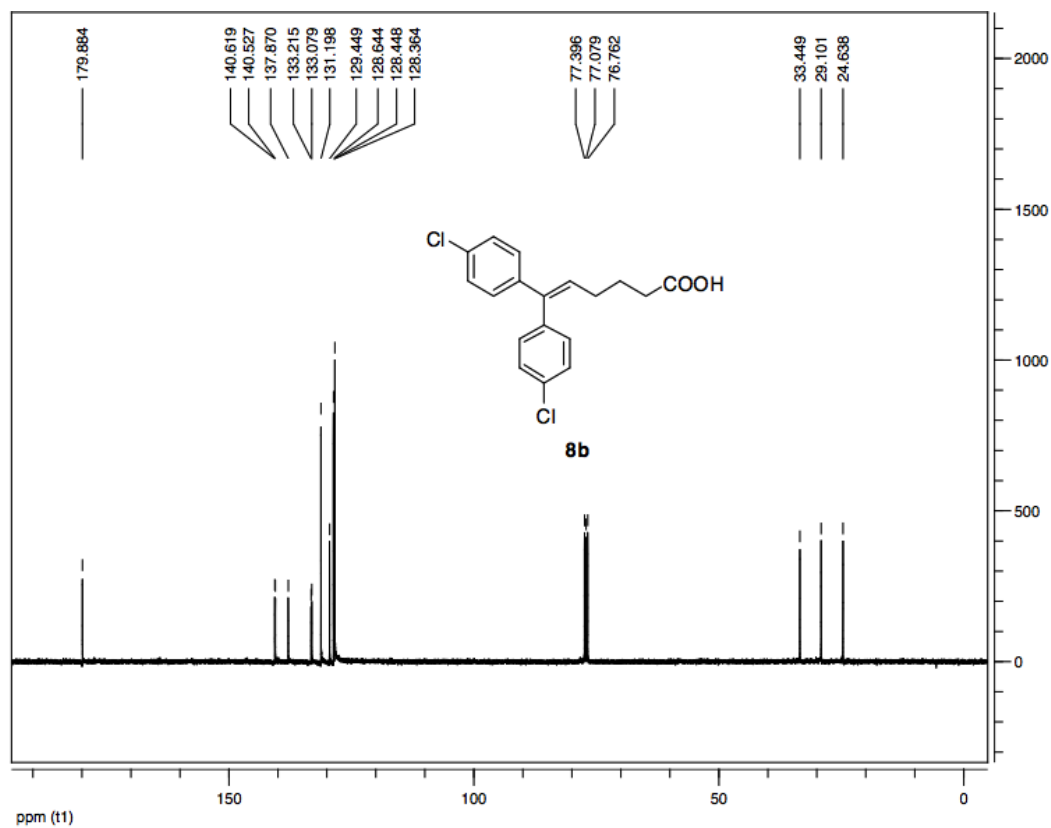



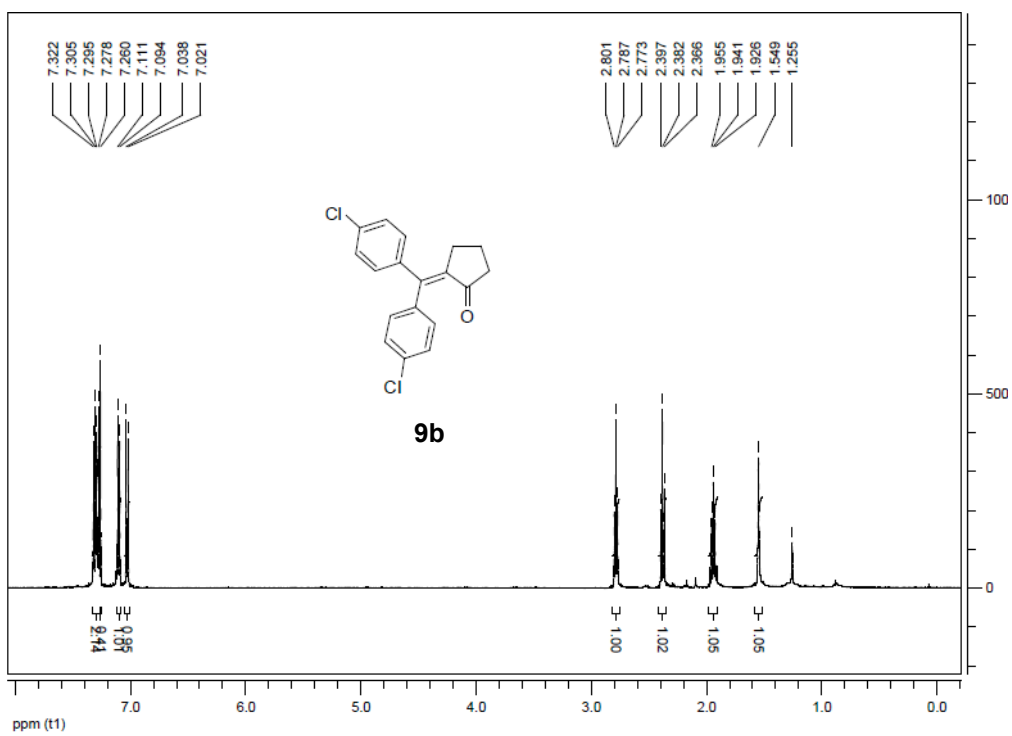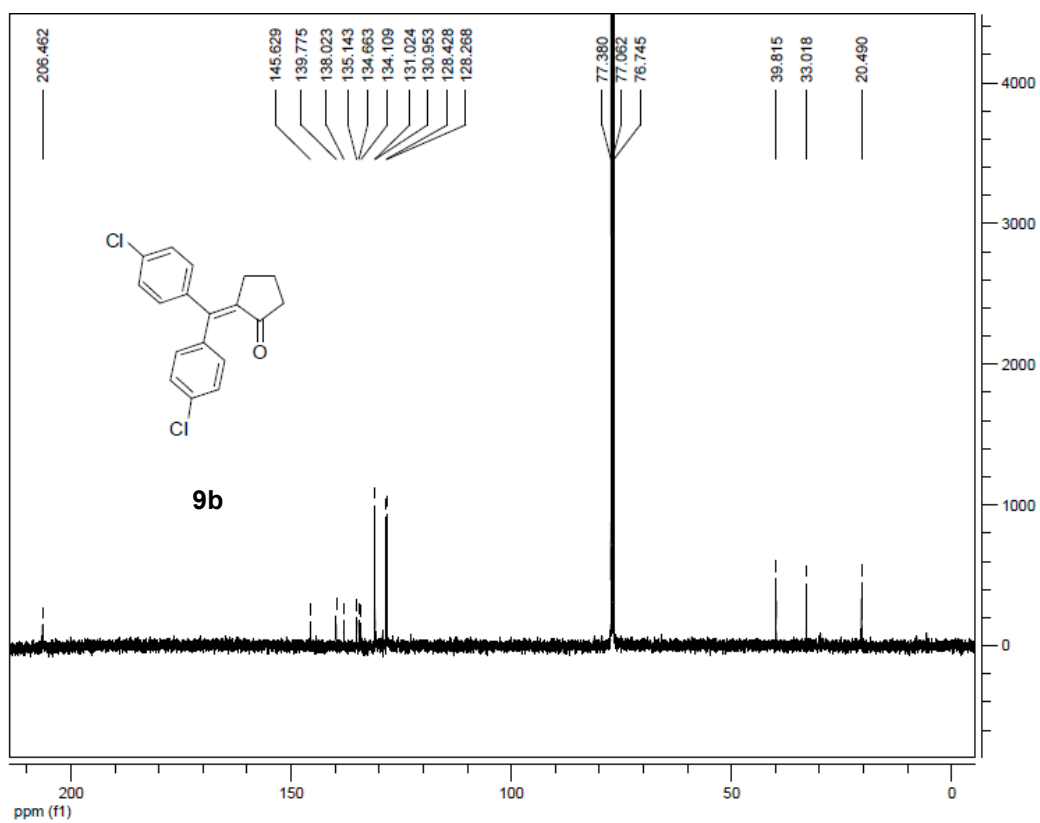



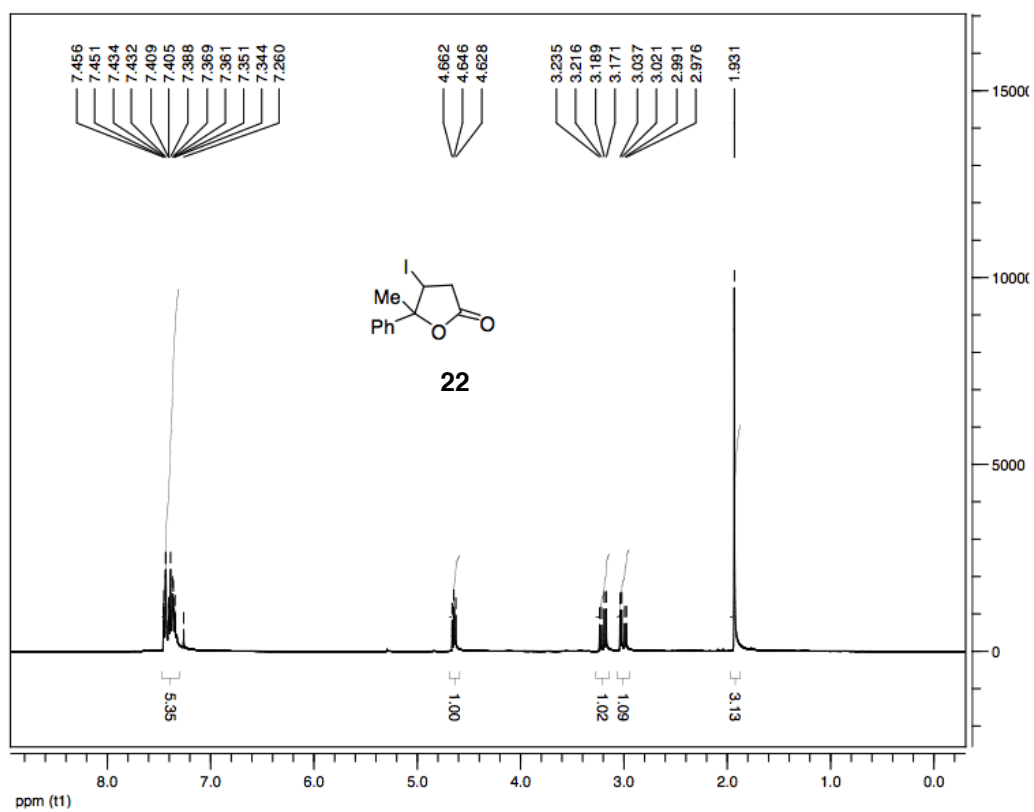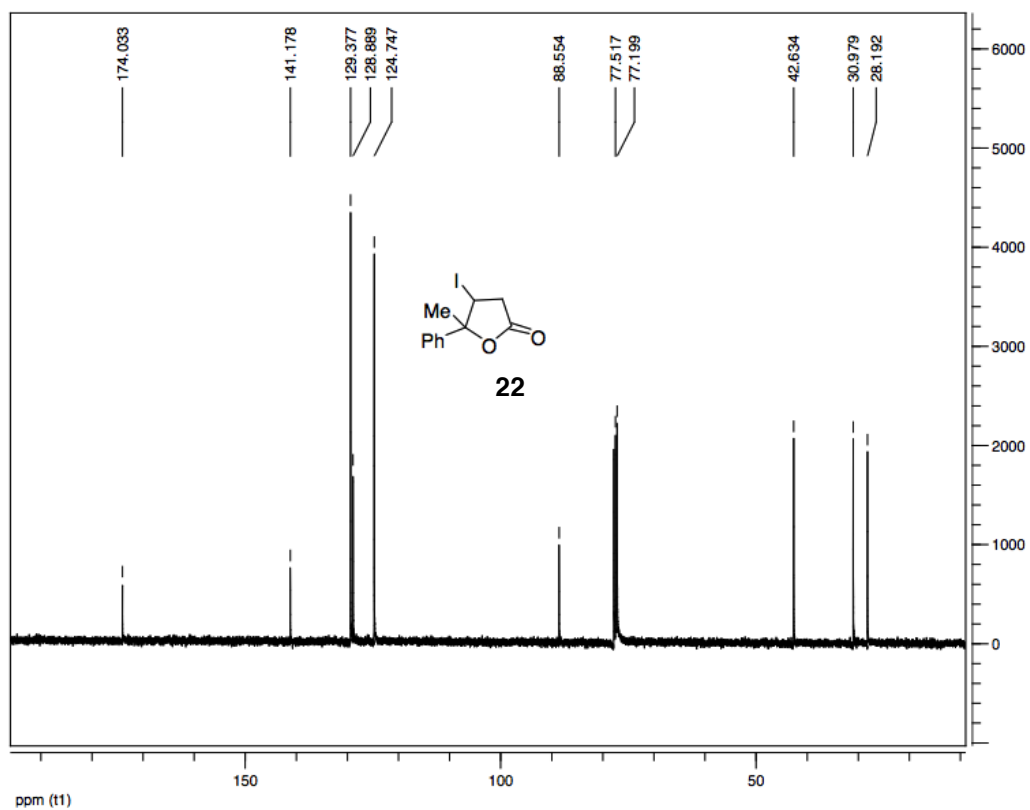

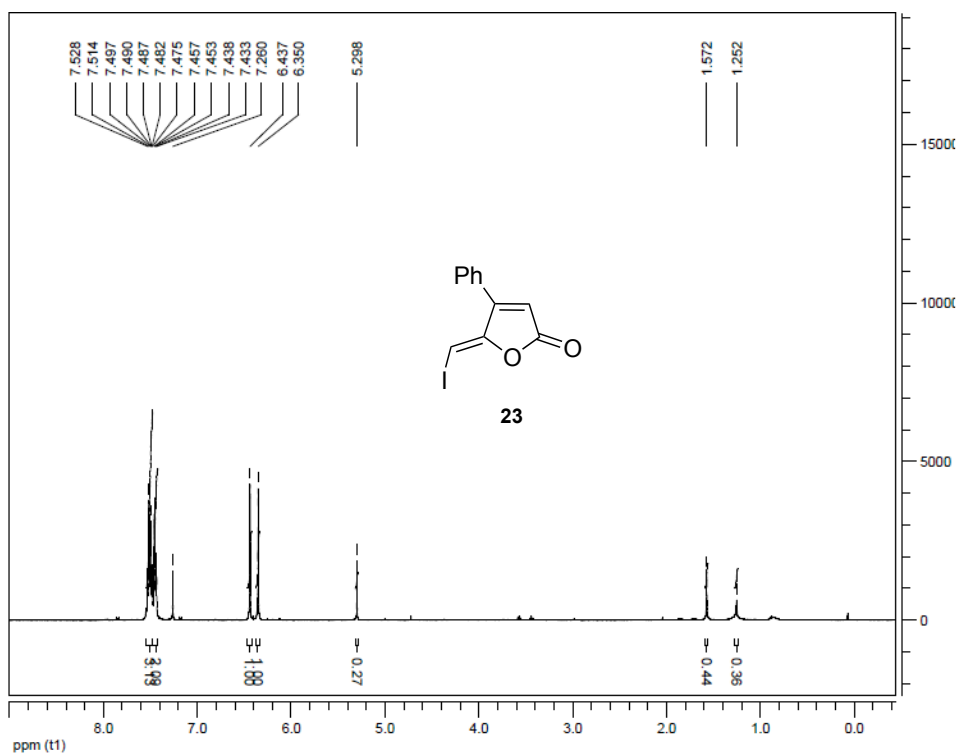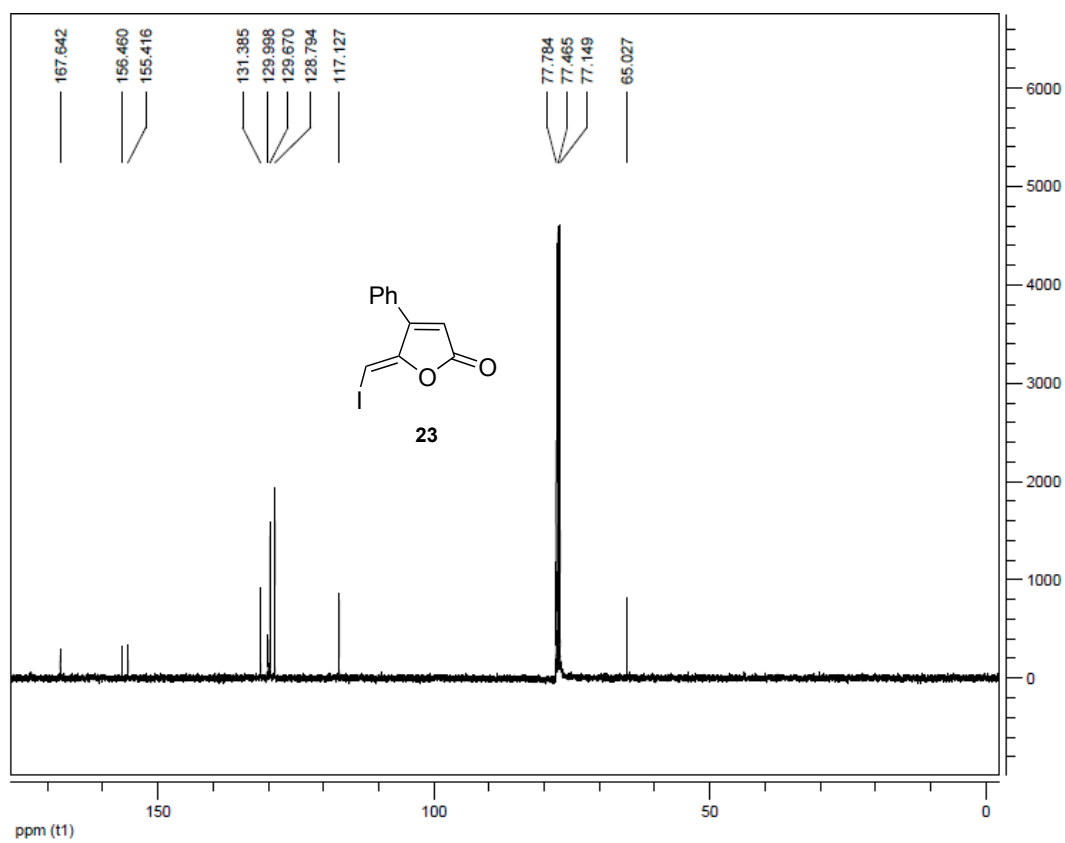

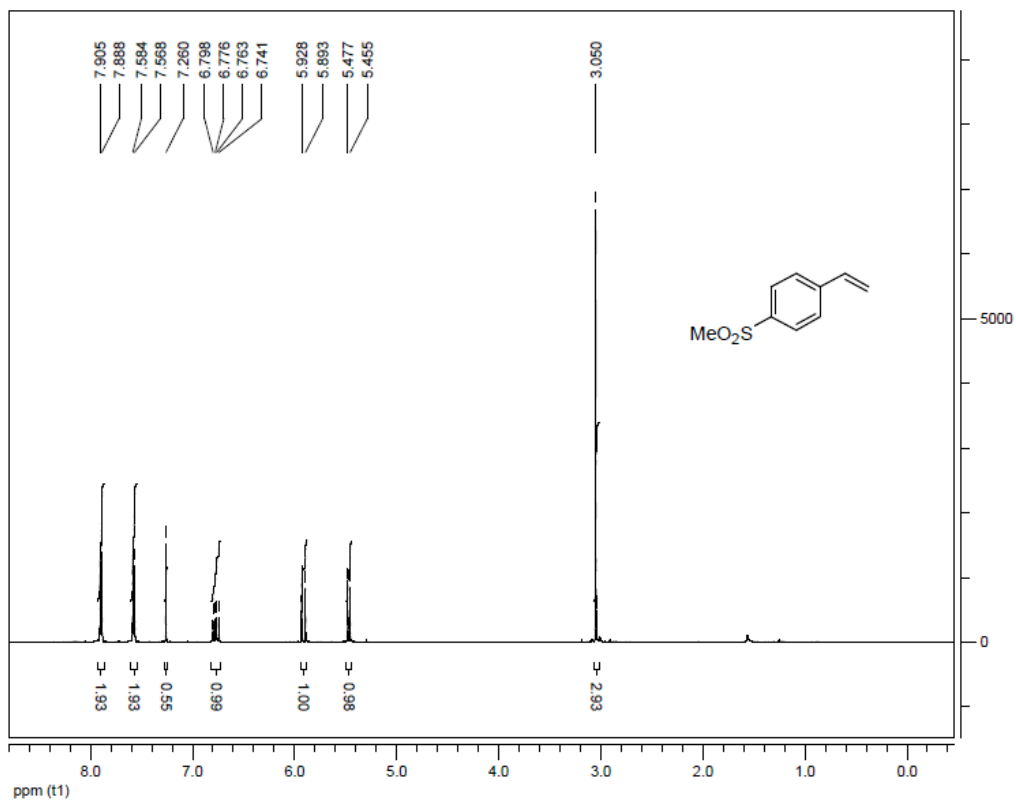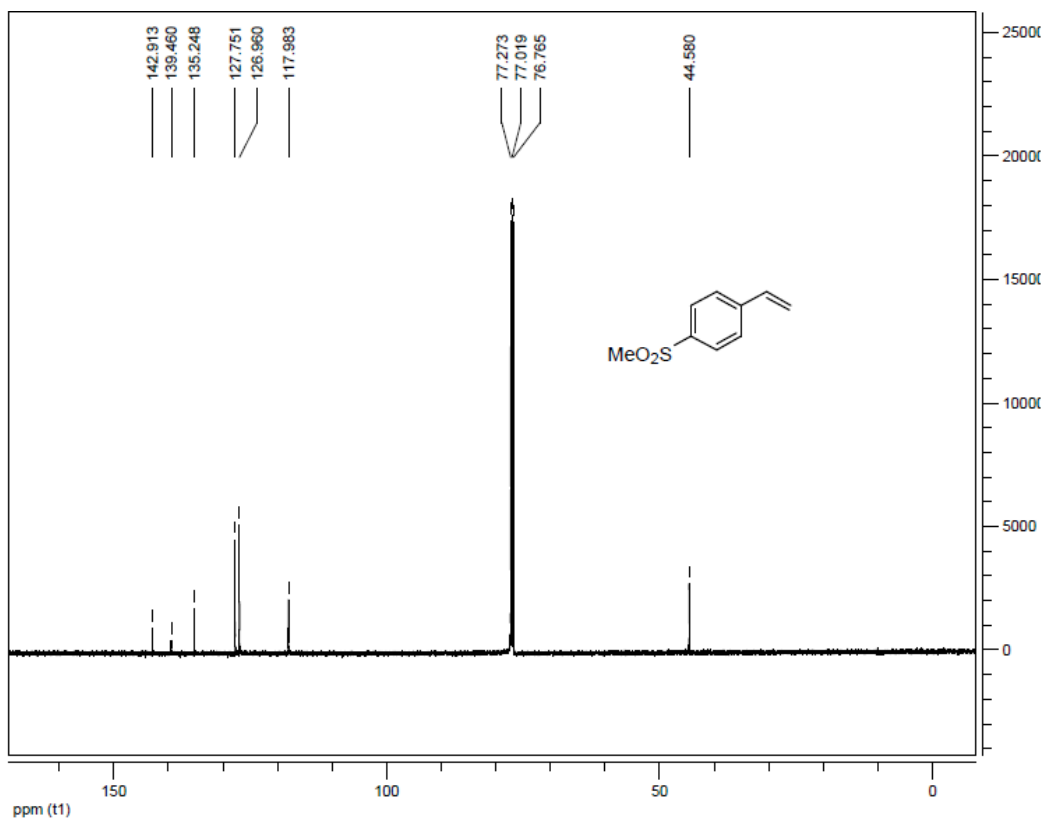

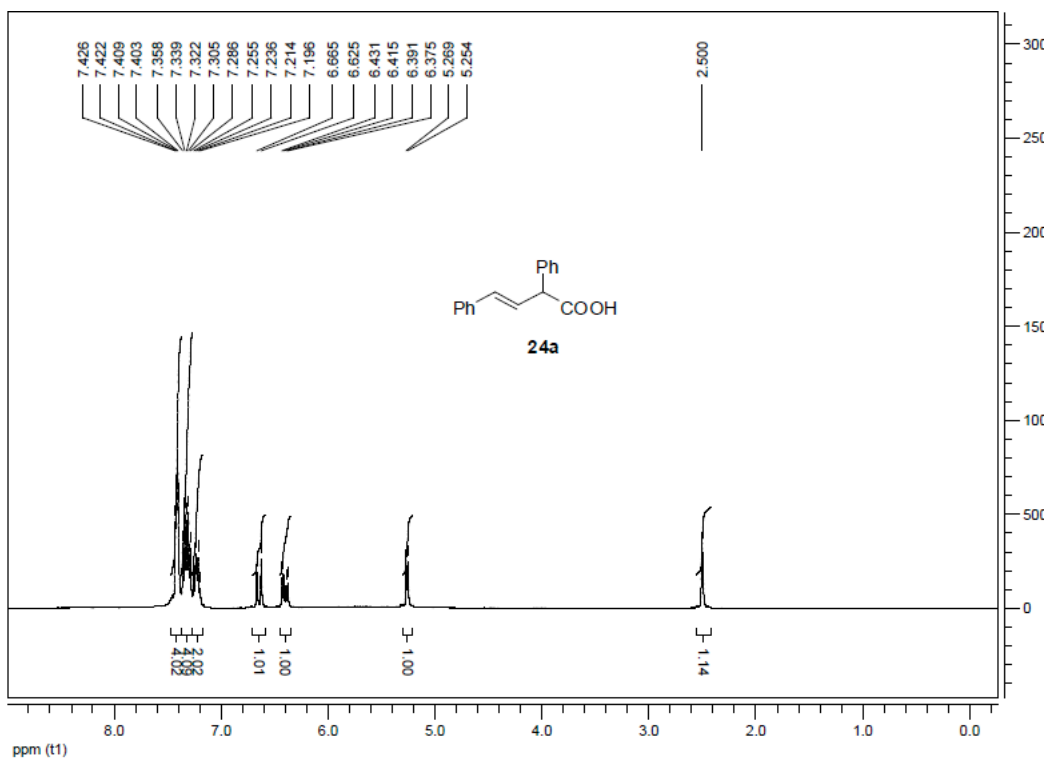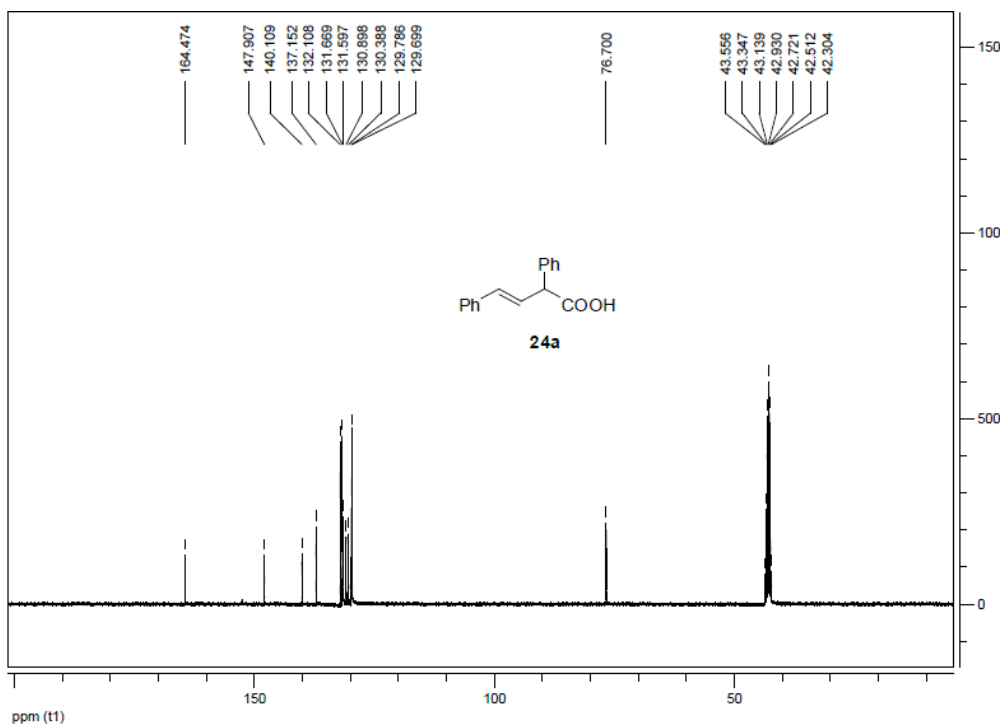

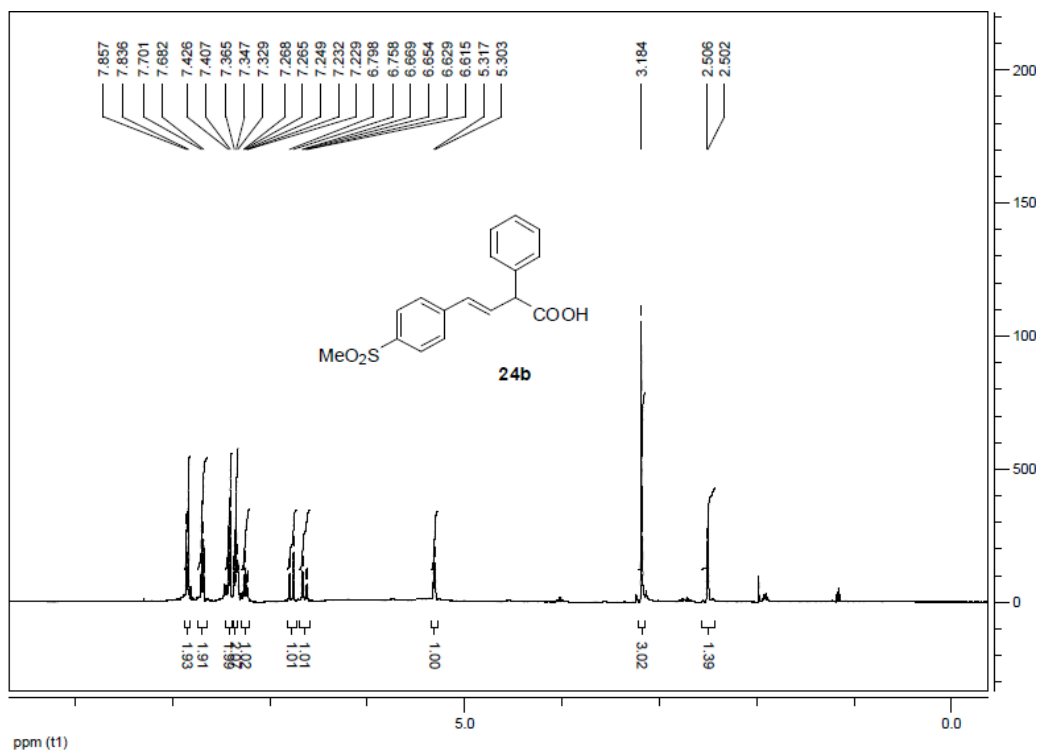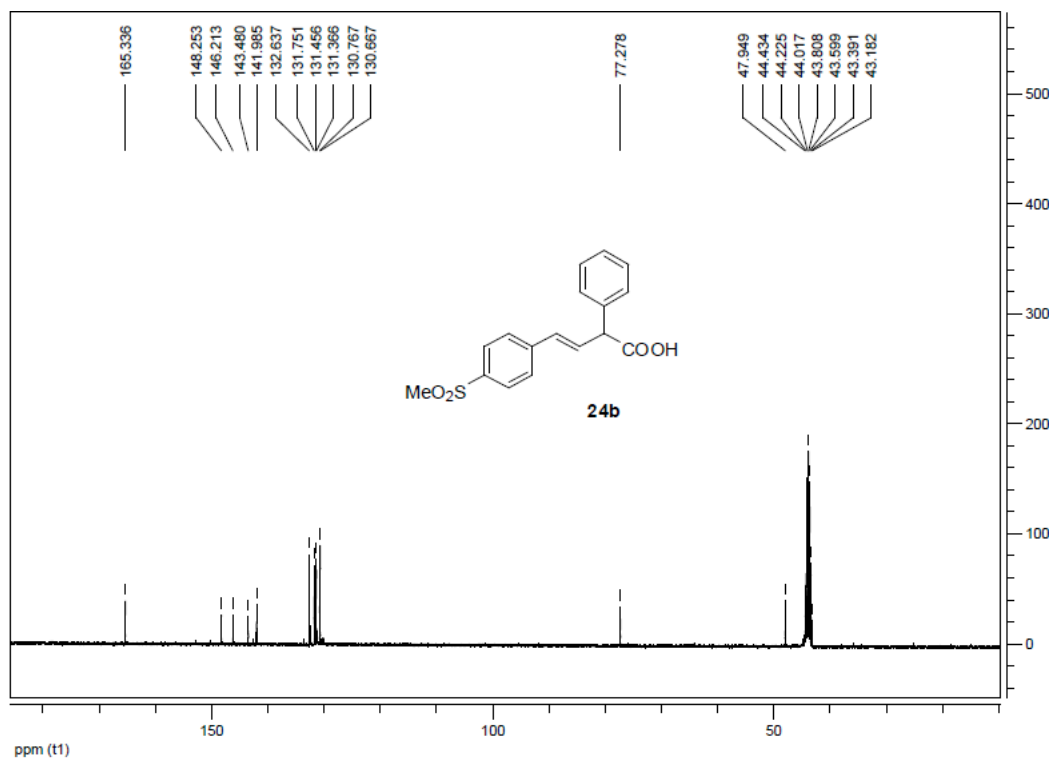

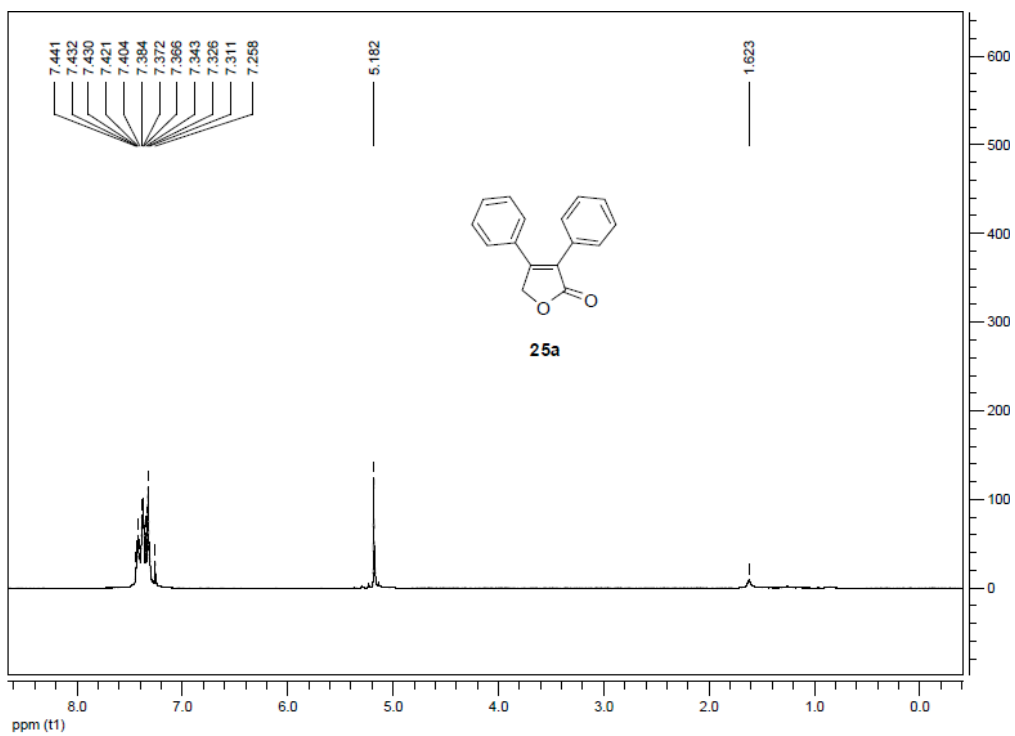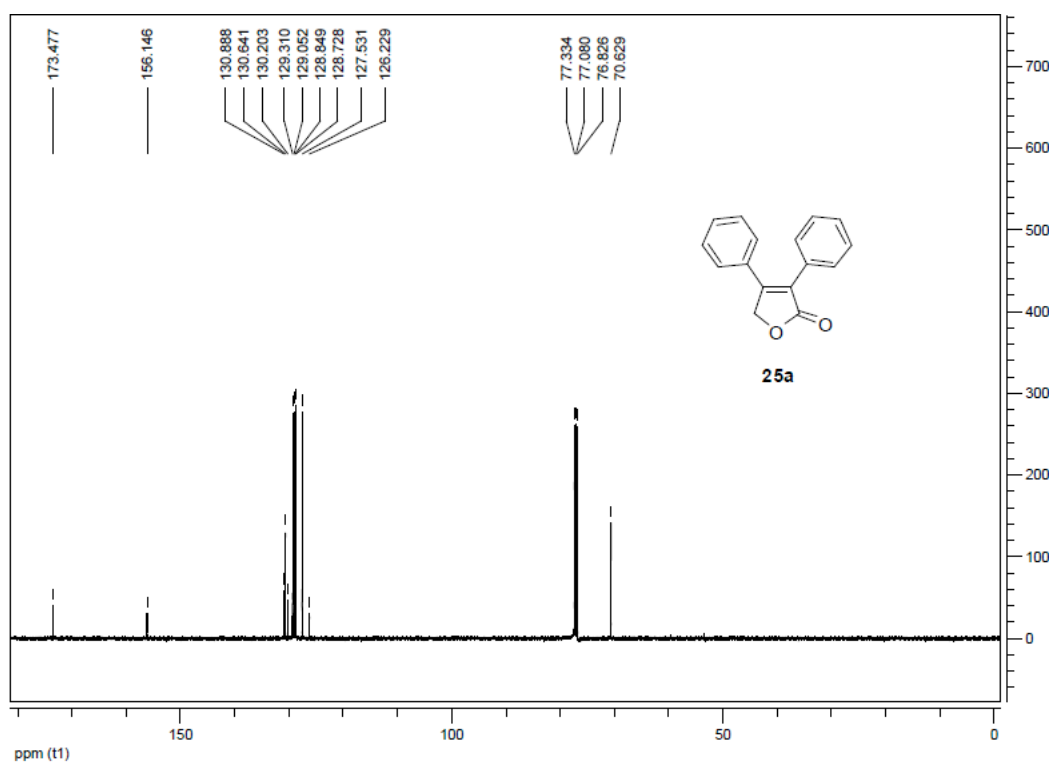

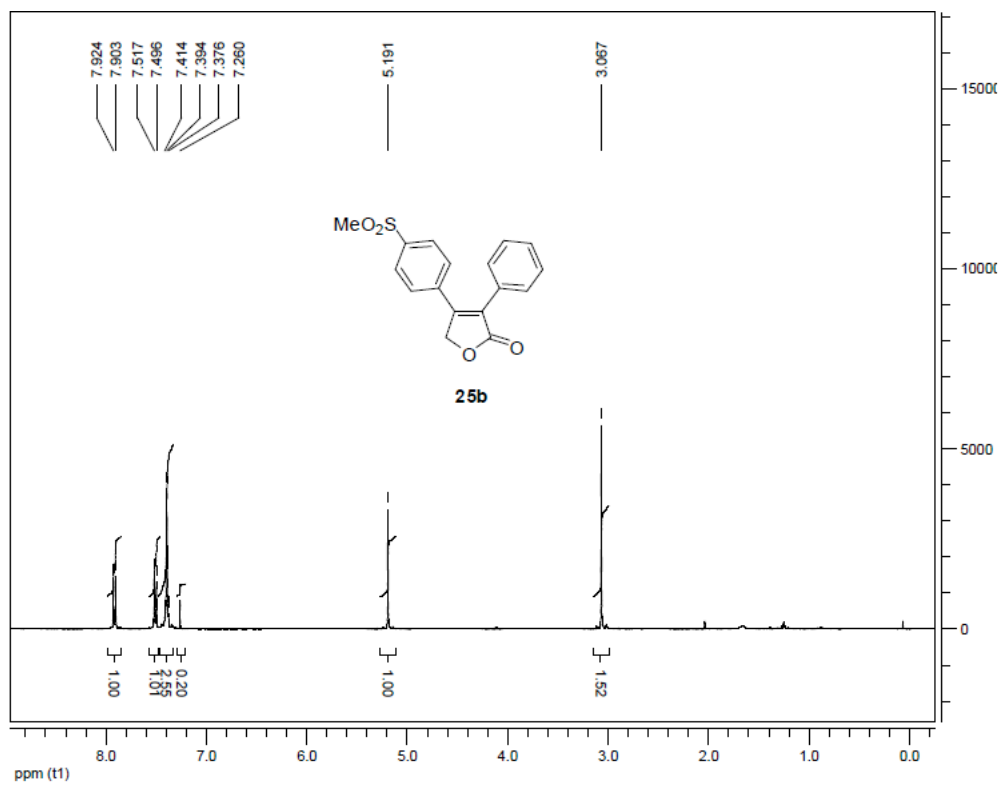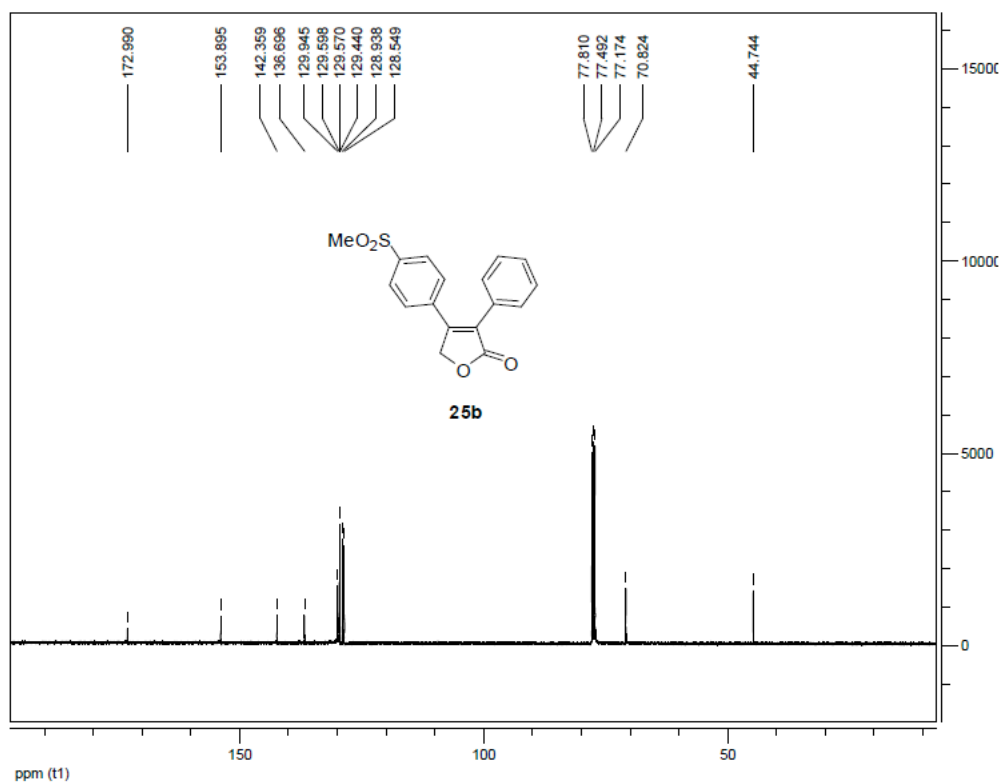

Supplement: open0001-0245-SD1.pdf [file open0001-0245-SD1.pdf]
